# Supplementary material for: The SWELL1-LRRC8 complex regulates endothelial AKT-eNOS signaling and vascular function
Source: eLife. 2021 Feb 25;10:e61313. doi: 10.7554/eLife.61313 (PMC7997661; doi:10.7554/eLife.61313)
Supplement: Figure 1—source data 1. [file elife-61313-fig1-data1.xlsx]

## Sheet: Sheet1
Scr In	Scr Out	SWELL1 In	SWELL1 Out
-5.61413	16.7544	-1.1896	5.60202
-17.4753	56.1009	-3.91027	11.7576
-21.0365	29.2268	-4.90098	18.0308
-13.0059	17.2424	-1.19787	5.13816
		-0.98674	7.10297
		-11.789	19.5627
