# Supplementary material for: The SWELL1-LRRC8 complex regulates endothelial AKT-eNOS signaling and vascular function
Source: eLife. 2021 Feb 25;10:e61313. doi: 10.7554/eLife.61313 (PMC7997661; doi:10.7554/eLife.61313)
Supplement: Figure 2—figure supplement 1—source data 1. [file elife-61313-fig2-figsupp1-data1.xlsx]

## Sheet: Sheet1
siRNA HUVECs basal condition rd. 1 C/T1
Gel 3	Actin	p-enos	pAKT1	p-enos/Actin	pAKT1/Actin	p-enos/Total enos	pAKT1/Akt	pAKT2/Akt	pS6K/Total S6K				p-enos/Actin	Stdev	SEM	mean	Ttest
C1	12296.7	15293	10398	1.24367	0.84559	0.921701	0.683857	0.663613	1.71253				Control	0.309078	0.12618	1.27123	0.00379774
C2	10174	9771	9877.78	0.960386	0.970883	0.818182	0.848646	0.763687	2.50763				T1	0.383605	0.156606	0.517501
C3	9391.08	16024.8	9192.9	1.70639	0.978898	0.955791	0.786126	0.761152	1.38256
C4	8511.08	13121.7	7905.59	1.54172	0.928859	0.945455	0.698229	0.77054	1.4937				Total enos/Actin	stdev	sem	mean	Ttest
C5	12626.6	11730.3	5447.52	0.929013	0.431433	0.984361	0.598723	1.15272	1.83891				Control	0.166168	0.0678377	0.831013	0.207986
C6	13921.9	17349.7	6792.3	1.24622	0.487884	1.16211	0.700765	0.859364	2.3277				T1	0.321437	0.131226	0.632161
T1 -1	15995.1	7427.58	1585.55	0.464367	0.0991273	0.667618	0.263042	0.592243	2.10018
T1 -2	16241.6	4284.78	1376.89	0.263815	0.0847756	0.543186	0.226138	0.49076	1.79831				p-enos/Total enos	stdev	sem	mean	Ttest
T1 -3	14119.8	4013.2	873.749	0.284224	0.061881	0.544319	0.131696	0.219343	2.64652				Control	0.11236	0.0383459	0.9646	0.000231961
T1 -4	10885.1	12586.7	1865.26	1.15633	0.171359	0.750133	0.149875	0.149379	1.52535				T1	0.134636	0.0549647	0.564649
T1 -5	12509	9823.46	1568.72	0.785308	0.125407	0.525976	0.121556	0.150378	1.66575
T1 -6	15246.8	2301.74	627.456	0.150965	0.0411532	0.356665	0.0777611	0.364179	2.6233				pAKT1/Actin	stdev	sem	mean	Ttest
													Control	0.248623	0.1015	0.773924	6.4527e-05
Gel 2	Actin	Swell1	Total enos	Total AKT	Total ps6K	Swell1/Actin	Total enos/Actin	Total AKT/Actin	Total S6K/Actin				T1	0.0465657	0.0190104	0.0972838
C1	16774.4	21194.4	16592.1	15204.9	15826.5	1.2635	0.989133	0.906433	0.943493
C2	17401.9	19537.9	11942.3	11639.5	11276.6	1.12275	0.686266	0.668862	0.648007				pAKT2/Actin	stdev	sem	mean	Ttest
C3	15900.5	16720	16766	11693.9	17220.5	1.05154	1.05443	0.735445	1.08302				Control	0.0918778	0.037509	0.55175	3.03804e-06
C4	16002.2	16270	13878.7	11322.3	17581.4	1.01673	0.8673	0.70755	1.09869				T1	0.0448695	0.0183179	0.162973
C5	18273.2	16157.1	11916.6	9098.56	13736.6	0.884192	0.652135	0.497917	0.751735
C6	20262.3	13089.5	14929.5	9692.68	12162.3	0.646	0.736812	0.47836	0.600241				pAKT1/Akt	stdev	sem	mean	Ttest
T1-1	21543.9	5557.52	11125.5	6027.73	13413.2	0.257962	0.516411	0.279788	0.622596				Control	0.0869237	0.0354865	0.719391	2.35446e-07
T1-2	19899.6	7097.9	7888.24	6088.73	14960.4	0.356686	0.396403	0.305973	0.751795				T1	0.0694547	0.0283548	0.161678
T1-3	18373.9	6324.71	7372.87	6634.61	10931.9	0.344222	0.401269	0.361089	0.59497
T1-4	17416.2	10657.5	16779.3	12445.4	18312	0.611927	0.963429	0.714585	1.05143				pAKT2/Akt	stdev	sem	mean	Ttest
T1-5	16774	5728.27	18676.6	12905.3	19013.2	0.341497	1.11343	0.769361	1.13349				Control	0.170503	0.0696078	0.828513	0.000659101
T1-6	16052.4	4331.59	6453.51	8069.02	9478.07	0.269841	0.402028	0.502668	0.590445				T1	0.185949	0.0634604	0.327714
Gel 1	Actin	pAKT2	Ps6k	pS6K/Actin	pAKT2/Actin								pS6Kinase/Actin	stdev	sem	mean	Ttest
C1	14047.4	10090.1	27103.4	1.92942	0.718291								Control	0.206618	0.0843515	1.57971	0.036342
C2	16987.2	8888.9	28277.4	1.66463	0.52327								T1	0.250585	0.102301	1.89998
C3	17795.4	8900.85	23808.5	1.3379	0.500177
C4	17332.3	8724.32	26261.3	1.51517	0.503357								Total S6K/Actin	stdev	sem	mean	Ttest
C5	17606.9	10488.1	25260.4	1.43469	0.595684								Control	0.217998	0.0743982	0.854198	0.643971
C6	17732.9	8329.54	28310.1	1.59647	0.469721								T1	0.242352	0.0989398	0.790788
T1 -1	17150.1	3569.88	28170	1.64256	0.208156
T1 -2	13990.3	2988.1	26903.5	1.92301	0.213584								pS6Kinase/Total S6K	stdev	sem	mean	Ttest
T1 -3	13892.4	1455.26	28931.5	2.08255	0.104752								Control	0.451821	0.184455	1.87717	0.514491
T1 -4	13755.5	1859.08	27932.2	2.03061	0.135152								T1	0.484292	0.197711	2.0599
T1 -5	14583.2	1940.67	31671.3	2.17176	0.133075
T1 -6	16047.4	2938.57	24863.8	1.5494	0.183118								Akt/Actin	stdev	sem	mean	Ttest
													Control	0.159891	0.0652752	0.665761	0.133164
	GAPDH 1	pErk1/2	pErk1/2 /GAPDH	pErk1/2 / Total Erk1/2									T1	0.211333	0.0721233	0.488911
C1	19504.1	18008.1	0.923298	0.629472
C2	14550.7	19716	1.35499	0.69534									pErk12/GAPDH	stdev	sem	mean	TTEST
C3	15209.4	19615.6	1.2897	0.820512									Control	0.262294	0.107081	1.27059	0.00951211
C4	13936.4	23364.2	1.67648	1.02988									T1	0.0595946	0.0243294	0.919338
C5	17242.4	22887.2	1.32738	0.891938
C6	18619.2	19581.7	1.05169	0.790631									pErk12/Total Erk12	stdev	sem	mean	TTEST
T1 -1	13955.6	13784	0.987708	0.61494									Control	0.142325	0.0581041	0.809629	0.00818833
T1 -2	14886.7	13411.4	0.900892	0.573019									T1	0.0691238	0.0282197	0.597292
T1 -3	14979.9	13660.4	0.911911	0.551947
T1 -4	17409.1	14663.6	0.842295	0.570928									SWELL1/Actin	stdev	sem	mean	Ttest
T1 -5	16466.5	14509.2	0.881133	0.543804									Control	0.212661	0.0868184	0.997452	9.52785e-05
T1 -6	16446.7	16316.5	0.992088	0.729116									T1	0.128474	0.0524495	0.363689
	GAPDH	Total Erk1/2	Total Erk1/2 /GAPDH
C1	16884.7	28608.2	1.69433
C2	15580.4	28354.5	1.81988
C3	12914.7	23906.6	1.85111
C4	15218.1	22686.3	1.49075
C5	17872.2	25660.1	1.43575
C6	19117.1	24767.1	1.29555
T1 -1	21365.3	22415.2	1.04914
T1 -2	20549.8	23404.7	1.13893
T1 -3	19066.7	24749.4	1.29805
T1 -4	16654.3	25683.8	1.54217
T1 -5	15505.6	26680.9	1.72073
T1 -6	12100	22378.5	1.84947
