# Supplementary material for: The SWELL1-LRRC8 complex regulates endothelial AKT-eNOS signaling and vascular function
Source: eLife. 2021 Feb 25;10:e61313. doi: 10.7554/eLife.61313 (PMC7997661; doi:10.7554/eLife.61313)
Supplement: Figure 2—source data 1. [file elife-61313-fig2-data1.xlsx]

## Sheet: Sheet1
shRNA HUVECs @ basal conditions rd. 2
	Actin 1	p-enos	Swell1	pAKT2	p-enos/Actin	Swell1/Actin	pAKT2/Actin	pAKT2/total AKT2	p-enos/total enos		p-enos/Actin	stdev	sem	mean	Ttest
Safe 1	14040.1	3795.81	5325.15	6643.9	0.270355	0.379282	0.47321	0.950341	0.430798		Safe 0	0.109824	0.0448357	0.382009	0.0134545
Safe 2	14896.7	4142.3	9261.58	10596.5	0.278067	0.621718	0.711332	1.27207	0.465432		L8a 0	0.0788233	0.0321795	0.216711
Safe 3	15911.1	7527.71	15478.1	12662.9	0.473112	0.97279	0.795858	1.22507	0.529933
Safe 4	14114.4	5985.66	16093.1	9619	0.424082	1.14019	0.681502	1.0624	0.442761		total enos/Actin	stdev	sem	mean	Ttest
Safe 5	15744	4954	12416	10780.7	0.31466	0.78862	0.68475	0.963428	0.393523		Safe 0	0.189568	0.0773909	0.805511	0.544777
Safe 6	16749.5	8907	18461.9	10745.8	0.531778	1.10224	0.641562	0.872735	0.561692		L8a 0	0.167089	0.0682138	0.74084
L8a 1	14320.5	2263.45	3090.45	1819.5	0.158057	0.215807	0.127056	0.284483	0.301061
L8a 2	19475.9	3921.45	7437.87	3389.22	0.201349	0.381902	0.174022	0.310338	0.294911		Swell1/Actin	stdev	sem	mean	Ttest
L8a 3	18511.1	2736.33	4265.59	2692.98	0.147821	0.230435	0.14548	0.301592	0.283539		Safe 0	0.296263	0.120949	0.83414	0.0207131
L8a 4	17384.3	3820.81	11065	3758.83	0.219785	0.63649	0.216219	0.303443	0.234409		L8a 0	0.189765	0.0774712	0.440104
L8a 5	16978.7	3505.22	10094.1	4303.71	0.206448	0.594518	0.253477	0.387975	0.255326
L8a 6	14794.1	5426.59	8602.36	4742.12	0.366807	0.581471	0.320541	0.417529	0.591383		Swell2/Actin	stdev	sem	mean	Ttest
											Safe 0	0.426594	0.174156	1.39462	0.00619358
											L8a 0	0.187796	0.0766675	0.737538
	Actin 2	total enos	Swell2	total AKT2	total enos/Actin	Swell2/Actin	total AKT2/Actin
Safe 1	14930.7	8811.12	10786.2	6991.07	0.590135	0.722419	0.468236				pAKT2/Actin	stdev	sem	mean	Ttest
Safe 2	15855.7	8899.89	18801.1	8330.15	0.561306	1.18577	0.525373				Safe 0	0.107019	0.0436903	0.664702	5.70146e-06
Safe 3	16063.1	14205	28891	10336.5	0.88433	1.7986	0.643496				L8a 0	0.0726574	0.0296623	0.206132
Safe 4	14403.5	13518.9	26346.1	9054.05	0.938589	1.82915	0.628602
Safe 5	15135.8	12588.9	18776	11189.9	0.831727	1.2405	0.739302				total AKT2/Actin	stdev	sem	mean	Ttest
Safe 6	15440.9	15857.5	24570.5	12312.8	1.02698	1.59126	0.797418				Safe 0	0.12425	0.050725	0.633738	0.803714
L8a 1	11199.3	7518.24	6920.61	6395.8	0.671316	0.617953	0.571092				L8a 0	0.0870222	0.0355267	0.649544
L8a 2	17380.2	13297	12115.9	10921.1	0.765069	0.697108	0.628363
L8a 3	16796.8	9650.6	8561.53	8929.24	0.57455	0.509712	0.531603				pAKT2/total AKT2	stdev	sem	mean	Ttest
L8a 4	16432.8	16299.8	17155.2	12387.3	0.991903	1.04396	0.753814				Safe 0	0.160384	0.0654764	1.05767	1.05081e-06
L8a 5	15830.2	13728.5	13509.1	11092.8	0.86723	0.853374	0.700732				L8a 0	0.0545638	0.0222756	0.334227
L8a 6	15959.3	9176.09	11221.3	11357.6	0.574969	0.703123	0.71166
											p-enos/total enos	stdev	sem	mean	Ttest
											Safe 0	0.0634742	0.0259132	0.47069	0.0369384
											L8a 0	0.13206	0.0539135	0.326772
											pAKT1/GAPDH	stdev	sem	mean	Ttest
											Safe 0	0.0714485	0.0291687	0.849478	0.000172748
											L8a 0	0.0916256	0.037406	0.574316
											Total AKT1/GAPDH	stdev	sem	mean	Ttest
											Safe 0	0.123503	0.05042	0.902466	0.920055
											L8a 0	0.113604	0.0463785	0.909518
	GAPDH	pAKT1	Total AKT1	pERK 1/2	Total ERK 1/2	pAKT1/GAPDH	Total AKT1/GAPDH	pERK1/2/GAPDH	Total ERK1/2/GAPDH	pERK12/Total ERK12
Safe 1	13356.8	10832.4	11196.9	13582.9	14692.3	0.811002	0.838289	1.01693	1.09998	0.924495	pERK1/2/GAPDH	stdev	sem	mean	Ttest
Safe 2	14763.2	11181.8	11794.9	16925.1	23423	0.757407	0.79894	1.14644	1.58658	0.722585	Safe 0	0.109628	0.0447556	1.02083	0.00358363
Safe 3	15295.2	14538.3	11739.4	15384.7	23764.3	0.950515	0.767523	1.00585	1.55371	0.647386	L8a 0	0.149683	0.0510837	0.734275
Safe 4	15195.9	12324.5	14052.7	14915.1	25511.9	0.81104	0.924771	0.981519	1.67887	0.584632
Safe 5	14822.6	12679.4	14841.1	12528.5	21824.8	0.855415	1.00125	0.845234	1.47241	0.57405	pS6K/GAPDH	stdev	sem	mean	Ttest
Safe 6	15647.6	14262.6	16962.3	17665.7	25256	0.911491	1.08402	1.12898	1.61406	0.699465	Safe 0	0.0752983	0.0256977	0.946414	0.014959
L8a 1	15894.8	8322.94	13772.6	13291.4	17244.2	0.523625	0.866484	0.836207	1.0849	0.770772	L8a 0	0.121317	0.0495274	1.11739
L8a 2	16856.3	8774.41	13575	10128.2	24455.2	0.520543	0.805337	0.600859	1.45081	0.414155
L8a 3	15971.1	7662.29	12273.3	12780.7	20076	0.479758	0.768468	0.800234	1.25702	0.636613	Total S6K/GAPDH	stdev	sem	mean	Ttest
L8a 4	16335.7	9432.82	15561.4	9130.29	26307.7	0.577435	0.952601	0.558915	1.61044	0.347058	Safe o	0.172589	0.0704593	0.702359	0.605628
L8a 5	15793.4	9595.36	16344.4	10509.2	21976.7	0.607557	1.03489	0.665417	1.39152	0.478195	L8a 0	0.0830202	0.0338929	0.66068
L8a 6	13932.2	10267.8	14340.8	13152.3	23058	0.736979	1.02932	0.944018	1.65501	0.570401
											pS6K/Total S6K	stdev	sem	mean	Ttest
	GAPDH	pS6K	Total S6K	pAKT1/Total AKT1	pS6K/GAPDH	Total S6K/GAPDH	pS6K/Total S6K				Safe 0	0.359537	0.14678	1.41636	0.167428
Safe 1	13492.6	12432.2	6225.27	0.967449	0.930772	0.466074	1.99705				L8a 0	0.366678	0.149696	1.72845
Safe 2	13688.2	13451.9	7840.17	0.948014	0.911173	0.53106	1.71576
Safe 3	13948.8	14187.9	13123.9	1.23842	0.927605	0.858042	1.08107				pAKT1/Total AKT1	Stdev	sem	mean	Ttest
Safe 4	11214.6	14324.9	10975.5	0.877017	0.942681	0.722266	1.30517				Safe 0	0.148171	0.0505675	0.954348	0.000460015
Safe 5	10518.4	12955.5	10971.7	0.854346	0.874041	0.7402	1.18082				L8a 0	0.0463928	0.0189398	0.630701
Safe 6	14887.4	17090.4	14028.2	0.84084	1.09221	0.896513	1.21829
L8a 1	15912.6	15630.5	12724	0.604311	0.983369	0.800511	1.22843				Total ERk12/GAPDH	stdev	sem	mean	Ttest
L8a 2	14750	15888.9	12073.7	0.646367	0.942612	0.716274	1.31599				Safe 0	0.20792	0.0848829	1.50093	0.465558
L8a 3	10325	18746	10041	0.624305	1.17374	0.628695	1.86695				L8a 0	0.215077	0.0878047	1.40828
L8a 4	12269.9	19936	9449.02	0.606167	1.22039	0.578427	2.10985
L8a 5	12271.2	18951.8	9490.66	0.587072	1.19999	0.600927	1.99689				pERK12/Total Erk12	stdev	sem	mean	Ttest
L8a 6	11070	16499.5	8906.12	0.715985	1.18427	0.639246	1.8526				Safe 0	0.128433	0.0438316	0.692102	0.0871588
											L8a 0	0.15512	0.0529391	0.536199
