# Supplementary material for: The SWELL1-LRRC8 complex regulates endothelial AKT-eNOS signaling and vascular function
Source: eLife. 2021 Feb 25;10:e61313. doi: 10.7554/eLife.61313 (PMC7997661; doi:10.7554/eLife.61313)
Supplement: Figure 3—source data 1. [file elife-61313-fig3-data1.xlsx]

## Sheet: Sheet1
shSCR	shSWELL1
100	21.5516
111.354	14.8077
110.936	14.8222
70.8422	15.211
103.511	18.5407
96.6796	18.7972
