# Supplementary material for: The SWELL1-LRRC8 complex regulates endothelial AKT-eNOS signaling and vascular function
Source: eLife. 2021 Feb 25;10:e61313. doi: 10.7554/eLife.61313 (PMC7997661; doi:10.7554/eLife.61313)
Supplement: Figure 3—source data 2. [file elife-61313-fig3-data2.xlsx]

## Sheet: Sheet1
shSCR	shSWELL1
100	42.4316
66.1209	35.6298
54.2625	30.0159
55.3809	23.3621
69.1362	20.8859
85.6947	21.4397
