# Supplementary material for: The SWELL1-LRRC8 complex regulates endothelial AKT-eNOS signaling and vascular function
Source: eLife. 2021 Feb 25;10:e61313. doi: 10.7554/eLife.61313 (PMC7997661; doi:10.7554/eLife.61313)
Supplement: Figure 4—source data 1. [file elife-61313-fig4-data1.xlsx]

## Sheet: Sheet1
Time	shSCR			shSWELL1
5	2.22763	1.97912	2.4785	1.85001	1.68756	1.29427
60	2.94445	2.81774	2.9715	2.17998	2.65693	1.3821
180	2.73171	4.1206	5.02759	1.83394	1.9995	1.751
