# Supplementary material for: The SWELL1-LRRC8 complex regulates endothelial AKT-eNOS signaling and vascular function
Source: eLife. 2021 Feb 25;10:e61313. doi: 10.7554/eLife.61313 (PMC7997661; doi:10.7554/eLife.61313)
Supplement: Figure 4—source data 2. [file elife-61313-fig4-data2.xlsx]

## Sheet: Sheet1
Fig4B, C, D - LRRC8a is required for intact stretch-induced AKT-eNOS signaling
	Lrrc8a	pAkt1	Total Akt	GAPDH	pAkt1/GAPDH		pAkt1/GAPDH	average	stdev	sem
shScr 0.1	2605844	652884	1425016	1192174	0.547642		shScr 0	0.52958	0.0240907	0.0139088
shScr 0.2	2377176	598872	1047632	1111347	0.53887		shScr 5	0.623012	0.0302588	0.0174699
shScr 0.3	2273655	565972	972120	1126925	0.502227		shL8a 0	0.458673	0.0324133	0.0187138
shScr 5.1	2579176	728108	849088	1157185	0.629206		shL8a 5	0.47372	0.0675529	0.0390017
shScr 5.2	2474014	688116	721008	1059137	0.649695
shScr 5.3	2468814	712752	869428	1207776	0.590136
shL8a 0.1	17669	550228	630888	1207741	0.455584
shL8a 0.2	7488	560576	311076	1138178	0.492521
shL8a 0.3	18021	490884	265588	1147153	0.427915
shL8a 5.1	23638	553364	565552	1234196	0.44836
shL8a 5.2	8620	523992	593216	1240168	0.422517
shL8a 5.3	11346	605844	665180	1100968	0.550283
	pAkt2	pErk1/2	GAPDH	pAkt2/GAPDH	pErk1/2/GAPDH		pAkt2/GAPDH	average	stdev	sem
shScr 0.1	748220	901488	1192174	0.62761	0.756171		shScr 0	0.561232	0.0601633	0.0347353
shScr 0.2	606568	790260	1111347	0.545795	0.711083		shScr 5	0.822849	0.0545092	0.0314709
shScr 0.3	575060	919948	1126925	0.510291	0.816335		shL8a 0	0.340067	0.0304716	0.0175928
shScr 5.1	940548	876316	1157185	0.81279	0.757283		shL8a 5	0.370647	0.0475651	0.0274617
shScr 5.2	933828	917944	1059137	0.881688	0.866691
shScr 5.3	934904	976884	1207776	0.774071	0.808829		pErk1/2/GAPDH	average	stdev	sem
shL8a 0.1	384708	337928	1207741	0.318535	0.279802		shScr 0	0.761196	0.0528055	0.0304872
shL8a 0.2	426740	344964	1138178	0.374933	0.303084		shScr 5	0.810934	0.0547344	0.0316009
shL8a 0.3	374812	346948	1147153	0.326732	0.302443		shL8a 0	0.29511	0.0132609	0.00765618
shL8a 5.1	458968	323268	1234196	0.371876	0.261926		shL8a 5	0.249172	0.0194024	0.011202
shL8a 5.2	399928	281324	1240168	0.322479	0.226843
shL8a 5.3	459748	284872	1100968	0.417585	0.258747
																													0	0	0	0	#DIV/0!			0.0146298	0.012306	0.00498908	0.00288045	#DIV/0!
																													0							0.00657894
																													0							0.0157093
																													0	0	0	0	#DIV/0!			0.0191525	0.0121362	0.00630359	0.00363938	#DIV/0!
																													0							0.00695067
																													0							0.0103055
