# Supplementary material for: The SWELL1-LRRC8 complex regulates endothelial AKT-eNOS signaling and vascular function
Source: eLife. 2021 Feb 25;10:e61313. doi: 10.7554/eLife.61313 (PMC7997661; doi:10.7554/eLife.61313)
Supplement: Figure 5—figure supplement 1—source data 1. [file elife-61313-fig5-figsupp1-data1.xlsx]

## Sheet: Sheet1
siSCR	siSWELL1
317.171	231.263
307.558	211.578
257.407	208.287
251.841	206.287
244.916	203.753
241.743	201.865
228.712	201.264
228.613	194.884
221.814	182.953
207.032	182.743
201.735	181.375
200.625	176.624
196.825	174.155
196.625	173.102
196.403	172.896
195.745	169.061
194.411	165.825
194.021	165.623
190.417	163.298
187.722	158.319
185.851	156.838
183.734	155.598
183.704	153.86
182.095	152.03
180.816	149.542
178.417	147.604
177.957	144.239
173.383	140.938
171.718	139.615
170.778	137.255
168.912	135.084
167.799	134.16
167.747	130.751
165.944	130.615
164.86	127.697
163.881	126.834
163.588	122.521
161.399	121.8
160.514	117.539
159.573	116.934
159.228	116.33
157.701	116.265
155.047	114.662
153.735	110.696
153.168	107.944
153.055	107.919
152.578	106.999
152.423	106.199
152.187	105.944
151.486	104.936
150.118	99.192
149.794	99.119
149.043	96.392
146.088	92.972
144.86	92.52
142.327	92.214
138.841	88.816
137.204	88.039
135.734	85.489
131.418	85.232
130.681	83.685
130.605	82.379
130.489	81.881
130.35	81.497
124.142	80.726
123.155	79.908
122.264	79.706
120.855	79.015
119.297	77.878
118.537	77.713
117.055	76.979
116.821	75.6
116.098	71.084
114.376	70.526
113.605	70.114
110.581	70.073
109.055	68.793
100.313	68.657
99.165	68.132
98.598	66.682
97.776	66.258
95.238	65.688
92.654	64.857
88.587	63.518
88.221	61.872
85.09	61.569
84.704	57.236
83.634	55.64
67.552	55.191
66.132	49.335
63.83	48.948
59.962	45.969
58.691	43.179
57.7	42.648
53.29	39.541
45.485	34.82
38.741	34.65
34.912	30.309
29.1	22.84
112.44	17.942
118.207	65.021
189.056	81.058
61.337	75.649
122.818	74.896
148.15	150.389
170.615	165.626
242.164	63.988
107.394	48.459
158.132	71.57
124.843	53.465
289.496	58.304
192.661	29.824
123.836	76.026
245.182	135.889
71.322	89.575
192.738	63.607
165.963	107.79
97.455	66.118
104.92	70.862
99.936	82.878
107.422	113.713
115.996	113.618
112.99	75.604
182.953	154.223
169.849	50.751
168.437	45.929
95.733	179.059
77.949	85.234
92.618	35.011
145.807	129.597
78.145	34.232
252.371	71.898
158.652	86.063
143.351	129.523
181.174	70.883
158.086	126.254
173.398	63.278
148.973	75.396
133.367	70.996
	23.62
