# Supplementary material for: The SWELL1-LRRC8 complex regulates endothelial AKT-eNOS signaling and vascular function
Source: eLife. 2021 Feb 25;10:e61313. doi: 10.7554/eLife.61313 (PMC7997661; doi:10.7554/eLife.61313)
Supplement: Figure 5—figure supplement 1—source data 2. [file elife-61313-fig5-figsupp1-data2.xlsx]

## Sheet: Sheet1
Control	Swell1
350.756	227.791
335.646	220.598
328.103	207.87
309.187	205.566
307.444	201.653
300.177	197.732
291.509	197.038
288.925	196.46
288.006	186.594
287.145	186.298
281.556	185.371
270.634	184.352
269.45	181.885
267.643	181.002
264.213	180.91
262.559	179.725
258.599	179.476
253.164	172.901
251.794	172.368
248.856	170.912
244.086	166.88
243.151	166.565
239.613	162.325
239.586	161.689
238.941	160.957
235.8	159.492
233.814	158.405
232.095	155.623
229.643	154.43
226	154.284
222.578	153.879
220.412	145.169
219.567	139.102
211.032	137.907
205.919	137.626
205.572	135.687
204.019	133.936
202.276	132.106
200.623	129.482
200.229	128.98
199.295	128.514
197.154	128.258
196.956	126.355
195.841	125.336
195.534	124.935
191.085	124.899
188.264	124.732
188.237	122.544
187.343	121.645
186.205	118.065
181.986	117.401
179.643	113.539
178.317	112.029
175.793	111.445
171.175	111.132
169.779	109.31
168.27	108.633
159.633	103.273
158.758	103.121
157.046	103.053
154.843	94.458
152.783	92.359
151.334	92.013
141.607	90.641
138.42	89.783
138.303	88.492
133.761	86.947
133.188	86.271
125.538	86.146
121.599	83.61
119.747	77.32
111.742	70.987
105.618	66.666
100.449	65.415
94.906	64.424
90.514	57.563
90.32	48.512
