# Supplementary material for: The SWELL1-LRRC8 complex regulates endothelial AKT-eNOS signaling and vascular function
Source: eLife. 2021 Feb 25;10:e61313. doi: 10.7554/eLife.61313 (PMC7997661; doi:10.7554/eLife.61313)
Supplement: Figure 5—source data 1. [file elife-61313-fig5-data1.xlsx]

## Sheet: Sheet1
Control End (24 hr)	Swell End (24 hr)
20.772	15.709
11.889	15.945
24.775	24.444			Experiments are divided by color
143.735	4.635
31.842	7.696							n
21.364	29.745			All trials				803
11.368	12.095			Trial 1				350
15.709	27.216			Trial 2				249
6.34	77.435			Trial 3				202
15.39	22.166
23.04	42.274							n
40.396	60.255			All trials				803
27.111	10.305			Trial 1				350
19.852	11.889			Trial 2				249
27.553	75.964			Trial 3				202
90	151.189
9.462	132.295
143.13	29.982
16.64	149.036
139.399	15.255
87.138	18.97
23.962	48.576
11.669	75.256
21.377	135
8.061	116.565
15.42	15.945
50.551	19.179
45.228	17.65
115.001	128.991
39.161	8.13
20.369	13.134
21.247	18.925
17.526	17.354
16.798	7.125
32.574	67.834
76.608	43.603
6.789	31.264
10.954	25.769
17.459	77.471
9.782	46.332
13.627	14.826
9.462	31.759
9.071	58.57
10.802	14.47
27.265	29.539
47.4	4.685
11.31	10.437
68.357	13.671
32.127	4.635
16.504	7.943
9.712	56.31
19.654	43.452
23.477	4.384
16.858	16.189
7.125	38.047
7.265	19.747
18.435	11.373
5.481	22.479
15.068	7.325
16.504	52.125
4.93	8.13
8.746	26.565
95.711	19.654
32.965	22.301
31.264	90
25.884	123.69
24.677	38.29
22.479	159.444
19.654	140.711
3.27	9.162
20.772	15.376
19.855	18.435
8.973	21.161
15.709	27.759
5.906	32.735
53.254	27.35
72.255	113.499
62.447	10.396
18.871	13.241
28.443	22.166
30.629	9.462
9.808	38.367
27.929	15.449
34.992	66.801
23.199	1.909
44.31	115.821
81.027	114.228
6.009	135
19.983	33.111
19.107	27.646
71.565	18.435
46.548	71.565
102.242	32.005
56.31	29.476
24.624	138.366
18.739	32.471
18.063	54.689
40.299	20.556
20.772	95.058
11.882	38.418
118.811	14.036
17.103	10.685
6.34	30.256
4.574	11.976
37.235	5.711
20.201	18.383
23.049	16.858
25.115	16.557
11.991	72.474
46.975	139.399
40.365	52.595
47.49	17.526
10.125	144.782
9.782	146.31
9.914	18.97
7.696	11.56
16.699	19.983
10.768	14.421
24.075	31.759
9.728	90
7.125	27.646
13.092	147.381
5.316	107.526
20.294	49.635
28.443	39.472
6.34	14.036
8.746	66.801
12.804	13.627
41.82	35.311
9.09	80.538
8.616	147.265
8.366	90
11.31	123.111
6.483	36.158
10.713	90
14.214	12.2
20.772	90
3.576	13.388
4.97	58.241
10.713	27.35
9.462	17.969
19.537	11.004
7.169	11.196
34.16	12.529
10.491	37.694
38.66	92.862
32.276	78.69
32.471	14.381
8.13	33.232
141.009	78.756
14.47	29.249
13.57	41.987
25.346	43.781
10.305	34.287
19.29	19.093
17.65	19.537
18.435	7.809
18.435	14.47
12.529	12.724
7.261	25.514
12.095	31.645
18.435	22.751
43.152	16.26
59.931	57.095
25.032	14.971
14.258	7.431
35.131	33.619
30.256	20.376
16.699	33.69
156.801	22.166
24.775	15.945
8.531	19.093
6.52	1.909
23.749	42.274
20.189	15.255
12.995	55.713
11.31	8.116
23.199	31.264
16.26	40.236
11.976	54.462
25.346	51.582
5.711	77.005
7.395	125.218
12.724	33.69
33.111	138.823
13.134	18.8
7.15	30.964
15.709	20.772
23.499	122.024
14.421	15.945
11.004	20.095
20.376	9.782
14.621	18.788
8.13	22.527
28.072	16.699
17.65	45
14.036	21.448
25.56	72.646
22.932	14.778
17.745	19.093
7.045	10.008
13.392	32.276
10.234	21.371
4.577	145.62
24.37	33.69
23.703	42.709
26.912	8.632
4.295	36.706
10.289	21.501
10.521	21.251
11.087	14.621
8.988	17.592
9.758	40.914
13.764	26.565
1.507	80.538
60.945	20.772
133.363	32.735
14.744	11.634
31.201	79.287
33.69	19.654
6.45	50.44
3.094	25.769
2.67	15.363
26.565	24.444
6.953	7.989
2.663	22.109
3.366	39.56
8.616	48.991
12.2	87.709
5.194	157.339
8.996	22.41
34.216	161.518
5.622	22.818
38.192	70.821
21.801	116.565
5.395	43.452
1.909	31.304
14.036	4.635
76.608	28.009
82.875	16.696
90	45.81
42.709	43.727
29.745	26.753
12.685	10.803
27.408	14.534
9.689	23.749
15.306	32.276
9.926	25.278
16.26	1.685
5.528	11.053
14.227	157.249
7.042	35.514
30.651	36.87
35.218	93.814
14.702	6.282
8.881	15.068
28.811	7.696
21.801	13.134
7.595	48.814
30.964	26.565
25.56	23.438
51.34	12.426
3.814	9.211
6.739	9.226
6.591	129.564
14.915	34.592
14.036	52.18
27.949	37.117
22.109	55.62
16.422	3.366
8.44	9.883
6.34	10.975
15.417	58.443
6.072	29.249
18.135	49.03
9.462	17.879
20.499	9.639
17.745	2.94
8.366	26.565
8.531	18.53
22.751	72.81
13.496	9.444
3.691	41.312
14.036	35.538
18.97	69.775
7.595	69.775
24.624	142.684
28.811	146.085
25.463	1.302
26.436	13.613
8.531	8.386
13.241	18.435
10.305	26.319
7.686	13.671
15.179	52.765
18.252	28.61
13.736	21.448
8.501	164.291
8.395	42.51
30.075	130.049
83.958	3.094
13.241	7.96
1.637	5.389
139.195	55.855
5.898	13.132
38.561	8.13
12.713	58.392
3.691	49.899
3.366	121.608
17.7	31.088
12.446	56.31
9.819	87.397
11.041	39.644
14.526	6.459
6.226	30.784
9.782	29.439
7.694	45
17.991	3.731
22.509	5.311
21.161	19.983
30.579	20.925
8.831	111.371
5.003	36.469
4.399	29.016
8.711	41.424
12.724	124.509
27.35	129.451
6.34	64.537
2.726	41.242
16.189	32.234
25.017	33.232
14.826	116.565
42.076	28.443
9.768	14.528
32.471	90
7.754	10.914
55.008	24.905
23.199	36.87
8.366	50.906
11.434	38.367
4.937	43.452
15.255	10.156
18.435	4.03
4.909	46.273
10.491	83.66
18.435	86.634
10.125	67.068
10.305	9.162
20.668	37.729
13.289	45.822
7.356	15.124
11.509	17.362
15.709	4.458
10.784	126.254
16.189	8.077
54.462	6.676
21.801	17.526
7.907	21.125
12.325	11.967
7.312	43.668
21.371	17.428
6.545	20.772
15.709	21.541
140.711	11.768
57.529	10.784
2.862	21.501
12.152	25.821
15.422	7.551
7.583	4.014
20.06	6.981
9.246	0
21.801	7.914
7.851	16.418
10.008	23.519
11.31	18.97
33.69	25.017
31.759	18.925
15.255	28.301
11.689	35.538
7.907	6.789
3.936	12.907
141.34	20.776
4.899	21.801
6.827	13.825
122.905	26.846
138.814	21.801
20.225	28.179
10.176	90
17.969	15.124
10.008	12.339
14.036	11.31
10.305	16.858
13.241	17.819
6.118	3.421
10.793	12.941
9.866	7.907
12.713	9.689
4.907	11.31
10.305	19.036
4.635	15.124
135	27.897
119.055	4.884
136.736	12.079
32.735	10.168
13.241	142.306
16.699	155.225
7.406	9.462
8.616	23.552
10.784	157.62
3.589	163.811
7.108	25.866
10.886	6.953
11.634	10.79
11.257	14.036
9.246	18.034
19.179	14.381
8.13	22.068
7.595	5.528
15.945	13.761
31.43	7.496
8.366	21.801
5.711	21.251
68.962	16.699
46.548	23.025
38.29	25.115
7.496	6.789
17.199	6.52
17.354	4.333
6.009	37.357
3.895	21.318
4.899	12.995
9.273	13.241
6.52	9.211
12.265	18.435
17.103	14.826
19.438	33.071
9.039	150.255
10.081	140.44
29.578	10.437
5.481	15.524
18.034	13.092
11.56	11.592
4.445	24.677
9.782	25.821
9.462	90
6.835	90
6.925	12.308
12.247	104.826
16.189	16.699
33.325	4.927
17.241	29.745
5.711	12.68
11.004	8.455
7.573	18.06
5.042	11.31
9.462	21.801
6.009	23.025
16.699	9.09
14.931	3.434
14.036	10.008
13.778	6.34
9.782	12.2
13.57	154.627
3.583	42.821
11.634	12.2
11.821	19.502
12.995	15.124
6.34	18.886
5.194	7.595
18.925	19.359
7.181	46.637
4.136	142.125
23	17.526
19.224	11.689
22.479	13.325
11.137	11.592
3.853	131.137
9.866	32.619
6.31	133.668
19.654	29.358
24.52	9.462
90	7.275
28.072	8.13
12.095	14.47
14.744	15.38
13.671	15.376
33.024	94.086
38.29	43.025
45	25.821
14.036	90
5.711	58.241
25.71	7.306
28.61	8.326
7.125	22.993
9.728	6.981
7.907	15.138
13.092	37.476
28.496	6.072
23.962	17.11
58.173	16.699
10.038	17.618
2.936	32.471
3.366	29.476
15.524	18.435
10.081	24.624
12.68	7.306
10.62	16.189
3.652	21.801
8.297	14.036
144.728	148.671
41.987	4.426
5.594	17.103
137.862	16.39
18.586	30.579
6.633	22.962
5.906	23.429
90	22.479
132.709	3.27
16.699	4.445
23.199	7.667
18.435	20.556
108.435	20.556
9.728	8.319
17.928	17.592
19.537	17.103
20.136	33.179
14.534	5.572
27.759	14.036
16.26	21.801
13.325	7.753
14.381	26.912
5.856	26.912
10.635	26.912
51.953	90
31.504	113.199
4.764	13.707
8.13	7.696
4.764	16.699
135	7.595
109.093	4.185
163.142	17.354
16.858	12.339
7.765	90
11.592	46.469
1.193	40.236
9.723	21.125
14.744	3.576
17.103	23.552
5.042	7.853
92.386	7.853
9.162	33.024
19.983	98.13
105.255	53.13
34.38	8.746
19.026	10.539
29.358	17.199
12.875	2.65
23.749	5.045
3.18	7.125
7.314	16.991
8.326	143.212
10.125	147.381
35.311	7.947
4.764	16.504
17.199	24.905
4.399	3.9
15.642	5.906
13.305	6.911
7.496	8.557
92.726	26.565
10.954	29.278
23.499	33.179
19.855	5.549
10.491	17.526
5.162	11.976
10.784	5.08
1.469	10.081
5.356	19.093
3.27	15.154
16.966	21.801
3.56	27.216
27.474	30.651
11.996	56.782
25.017	17.346
11.634	6.981
137.121	20.685
4.754	8.746
127.405	24.228
6.981	3.535
13.173	17.65
12.724	24.444
23.806	27.408
12.339	145.222
3.415	6.091
8.531	38.928
7.765	147.804
17.526	6.582
9.782	33.69
34.992	8.13
141.843	16.928
27.553	18.435
36.384	34.592
4.574	75.964
4.847	84.289
37.694	118.072
14.077	35.538
7.015	70.821
119.21	85.601
112.166	16.26
42.138	30.964
26.941	156.501
31.264	24.905
18.529	21.545
24.305	11.133
20.772	60.524
8.746	26.565
10.522	10.125
90	13.427
90	37.405
7.125	74.055
81.87	28.61
14.421	29.249
25.56	32.196
14.931	90
9.211	90
13.128	151.557
12.369	113.199
19.599	80.538
25.641	90
7.153	64.547
21.801	58.392
15.918	67.521
32.471	79.216
31.759	130.101
15.255	92.726
11.689	42.51
14.036	135
19.093	140.089
5.051	104.621
12.875	101.768
25.346	20.308
18.435	48.576
4.649	32.471
61.526	23.429
92.936	19.093
87.614	92.203
13.134	26.565
24.228	26.565
23.107	95.44
13.241	90
74.055	20.323
33.048	122.196
143.13	26.565
83.66	19.654
59.036	79.695
32.471	53.13
8.427	45.974
8.025	42.879
9.162	109.983
6.009	78.69
83.089	23.962
5.356	90
27.15	9.462
60.945	53.746
46.018	8.13
8.484	23.199
10.305	27.767
40.365	9.728
23.199	64.44
25.641	84.289
10.176	63.435
51.953	81.027
15.255	147.804
10.125	90
12.529	112.812
12.724	34.824
32.471	137.862
7.943	36.254
57.095	25.71
32.196	96.009
8.881	28.301
14.49	93.576
25.641	15.945
10.305	77.661
18.435	80.538
13.57	23.199
10.305	71.565
12.095	142.524
59.744	81.469
70.71	42.51
17.241	16.504
19.093	9.782
10.305	90
11.31	121.759
7.125	91.909
21.088	122.218
66.371	17.969
15.422	131.987
90	58.57
86.634	146.889
68.749	66.571
11.31	81.027
22.166	90
21.038	90
17.819	12.549
14.47	5.102
28.595	24.444
164.461	90
15.721	27.646
7.352	53.13
45	113.199
26.565	123.69
17.103	4.764
1.79	11.976
33.111	69.444
9.994	90
21.501	48.366
20.772	43.668
25.017	15.945
97.431	25.71
27.897	28.811
118.413	115.463
19.796	16.928
39.269	12.804
15.811	37.405
7.302	40.815
40.101	25.724
11.689	90
13.699	8.573
59.931	9.034
2.437	147.724
19.799	19.29
24.905	10.141
31.759	41.424
80.489	25.017
25.346	34.509
43.452	13.743
90	45
20.108	2.862
18.004	18.435
24.775	149.534
14.931	34.287
13.134	90
80.538	95.711
14.931	98.531
24.775	16.26
122.276	10.886
8.809	37.304
58.671	55.491
85.03	86.84
90	30.964
34.38	34.992
87.274	90
107.442	90
144.462	37.875
37.569	77.905
138.366	27.35
144.689	37.405
66.251	31.329
69.671	47.386
61.821	25.641
66.038	105.068
30.579	107.103
33.69	15.035
21.801	11.238
10.491	18.435
16.645	6.444
85.914	19.419
71.565	9.162
43.452	36.469
6.52	33.69
47.603	21.801
11.31	32.735
7.759	157.011
18.492	53.746
20.136	23.346
36.87	16.144
26.565	12.995
10.125	35.497
29.982	21.801
31.427	102.529
12.095	161.775
81.573	108.435
9.782	62.488
17.836	90
14.534	74.745
68.134	95.44
16.995	11.31
27.255	121.43
23.199	90
24.228	15.772
18.951	136.975
12.69	90
20.169	110.556
17.819	135
20.69	78.566
19.093	48.366
52.405	81.085
116.255	20.259
81.027	30.466
33.179	6.575
90	35.771
49.399	6.367
