# Supplementary material for: The SWELL1-LRRC8 complex regulates endothelial AKT-eNOS signaling and vascular function
Source: eLife. 2021 Feb 25;10:e61313. doi: 10.7554/eLife.61313 (PMC7997661; doi:10.7554/eLife.61313)
Supplement: Figure 5—source data 2. [file elife-61313-fig5-data2.xlsx]

## Sheet: Sheet1
siSCR	siSWELL1
200	860
400	1460
560	1400
760	680
1460	1340
840	1460
520	920
420	720
620	1000
660	640
1460	1460
840	880
600	1460
520	960
880	1260
700	1140
1240	1460
640	1460
580	840
440	980
700	780
380	1140
820	820
720	1200
720	1460
760	1460
460	1080
660	980
440	740
880	1000
600	780
880	1020
640	460
640	900
400	840
920	740
1460	1460
1340	1460
480	1040
880	960
960	1460
1340	1300
1060	900
840	1460
1460	1200
1360	920
640	1460
540	1440
560	1160
360	1140
1460	1180
1460	1180
1000	1140
840	1460
720	980
620	1460
600	1380
1200	1460
460	1460
1180	900
560	1460
1420	1460
1460	1320
1120	1340
860	920
1180	1260
1080	1460
880	1460
1020	940
1040	1180
1160	1060
860	1020
840	1460
700	1460
620	1400
1460	1340
1080	1100
1260	560
920	1460
1460	1400
1220	1260
1080	1320
1000	1460
1460	1360
1120	1460
1280	1160
780	1380
200	1460
540	1160
1240	1260
1320	1380
580	1360
480	1460
560	1460
680	1100
1460	500
1200	1380
1340	1360
840	1420
820	1340
1280	980
920	1460
840	1460
760	1300
620	1460
820	1140
1460	1460
1460	1440
1260	1340
1380	1420
