# Supplementary material for: The SWELL1-LRRC8 complex regulates endothelial AKT-eNOS signaling and vascular function
Source: eLife. 2021 Feb 25;10:e61313. doi: 10.7554/eLife.61313 (PMC7997661; doi:10.7554/eLife.61313)
Supplement: Figure 5—source data 3. [file elife-61313-fig5-data3.xlsx]

## Sheet: Sheet1
siscr			siswell1
0	8	24	0	8	24
1.09361	0.999392	3.71387	0.661677	1.20452	1.03328
1.6737	2.11768	3.12158	0.782677	2.23597	1.43808
2.16903	1.95	3.80491	1.1132	1.125	1.11516
1.7619	1.28982	2.76252	1.01026	1.3758	1.53571
0.813137	1.83134	4.3435	1.73125	1.89624	0.5114
0.558824	2.74701	3.41176	1.80053	1.68018	3.04493
1.31852	0.923347	2.70434	1.02238	0.669913	0.717161
1.61117	0.529327	2.08603	1.80508	1.81134	1.17111
1.00842	1.95756	1.88235	0.775811	1.03333	1.41553
0.529239	1.07803	1.54359	1.13456	2.01013	1.22064
0.941998	0.771504	4.49219	1.11111	1.187	0.527024
0.975727	2.06331	4.85714	2.31693	2.18133	0.939747
0.917903	1.44258	5.344	0.961538	0.966783	0.750462
0.78125	1.50688	2.89528	1.35919	1.19549	2.13142
1.15402	1.42857	3.52995	3.53493	1.19393	0.524091
0.657143	1.2636	3.5703	0.426308	1.8	0.711111
1.1912	1.5118	1.40362	1.53936	2.14352	2.26528
1.6118	1.09185	1.5027	0.40987	1.40007	0.877113
0.939172	1.88462	3.93333	0.682625	0.896552	3.22232
2.26271	2.00625	1.9826	0.823915	1.53282	2.20542
0.886538	2.24494	4.391	1.6478	1.22569	1.58333
1.68511	1.14401	2.19234	1.34697	0.770569	2.2381
1.29377	2.02013	4.82918	1.01804	1.88798	1.54754
1.42347	2.2945	3.75883	1.08107	1.09085	1.06159
1.21992	0.477273	0.662636	0.85009	2.10717	1.06398
0.694444	2.38072	2.58169	1.31394	1.6365	1.8454
1.18718	2.26316	3.11969	0.990922	2.33905	1.11336
1.03067	1.94994	2.85984	0.74327	2.56993	1.18098
0.917344	2.80983	2.61111	1.00944	0.513124	2.68765
1.10714	4.08304	4.02007	0.970948	1.625	0.807287
1.44284	1.86308	3.25373	0.659533	1.92469	2.03474
1	0.629477	2.2345	1.2064	1.11492	1.99225
0.753156	1.76471	4.03389	0.8	2.05111	1.69002
1.03571	0.982819	10.0616	1.2	0.659258	3.91959
1.45118	1.83571	4.75626	0.687262	1.15	2.11574
0.876847	1.82662	1.63501	0.758621	0.596542	4.26996
1.6132	1.12	2.26667	1.33333	1.75	1.2118
0.434783	1.9494	2.402	1.15789	0.817458	1.5602
0.804913	1.56323	2.91667	0.958333	1	3.97564
0.800359	2.54907	3.49789	1.04	0.820906	5.75507
0.912459	0.722222	3.55481	1.09202	2.38889	1.37725
0.933333	1.00625	2.78571	1.64483	1.2658	2.40557
0.89474	1.48935	1.88889	0.952354	1.88752	2.59857
0.896552	3.13153	2.20706	0.771429	1	3.89542
0.77553	1.24933	2.71114	2.09271	0.733333	0.376102
1.16443	1.5088	3.18071	1.20984	1.40909	1.29085
2.4375	3.21429	9.58178	1.11012	0.574139	3.25813
1.54167	1.98259	4.5	2.24539	1.58383	1.18878
0.852197	2.83775	4.84487	1.59091	1.61683	2.15623
1.42372	2.07402	3.96169	2.43725	1.88173	2.21157
2.09463	1.25993	3.92387	0.823556	1.60719	2.064
1.35508	0.783796	5.2825	0.971704	0.924774	2.2118
1.27277	2.77147	3.59946	1.44828	0.949962	4.75554
1.43123	2.40665	3.20282	1.005	1.20274	1.21053
1.18182	2.81818	3.94543	0.429692	1.19048	2.01159
1.30435	0.907794	3.81	0.7412	2.32317	1.84
1.21163	1.91428	5.08405	0.350796	0.31017	3.65446
1.08264	1.01622	1.25355	0.664843	1.15734	3.56674
0.567568	1.42868	0.891207	1.35464	0.617579	2.17391
1.13279	1.26551	2.6	0.680231	1.47989	2.35253
1.42857	2.10602	2.1451	0.761068	0.984424	1.59091
0.664105	1.75694	3.2546	2.01113	0.907131	0.593147
1.13294	0.927484	1.95971	0.559746	0.818182	1.69758
0.807692	2.29224	2.56545	0.972229	0.823556	1.34773
1.52941	2.18021	3.79581	2.71824	2.09752	0.465755
1.57364	1.10615	2.22222	0.458536	1.04348	1.27165
2.3118	0.861121	1.7841	0.689655	1.15427	0.738071
2.38289	1.375	3.06596	0.755015	1.42282	0.636042
2.07895	1.30827	4.38401	1.05129	2.00474	3.16254
2.34788	1.70905	1.68526	2.88042	0.818539	2.11768
1.24933	1.9735	2.23503	1.52145	2.59557	0.75
1.05886	1.09426	4.89964	0.779252	0.597496	1.93337
2.96505	1.12263	2.69433	1.12	3.38462	0.697674
1.12875	1.27993	0.630252	0.498563	0.873617	1.93412
0.961459	1.41496	2.70313	1.09591	0.554881	0.678571
1.73684	2.10526	1.26923	1.43669	1.60031	1.06897
1.85619	1.80097	1.41712	1.10787	1.03125	0.849731
1.12446	1.18271	0.643069	1.03531	0.614116	3.68735
0.812372	0.823848	5.46357	0.621622	0.924595	4.62364
0.965104	0.485381	0.798602	1.63342	1.16129	1.05562
0.700707	0.925926	3.58574	0.315747	0.898516	1.04721
0.96875	3.56469	2.93097	1.89159	5.61952	0.531049
2.26593	2.14159	3.44752	0.749518	1.71043	2.95595
1.17241	2.84695	3.41873	0.632985	1.35294	3.42441
0.818182	1.57604	2.73128	1.70588	1.71406	4.12179
1.52207	1.50231	0.511182	1.63636	2.00052	1.18176
1	2.63158	4.12306	1.45455	6.08469	1.92666
0.878049	1.42424	1.885	1.13793	0.807896	2.16813
2.11576	3.50071	2.9377	0.92	0.676471	3.68182
2.09534	4.15183	3.24529	0.931034	2.11538	2.14338
1.0354	2.00052	3.03172	1.30435	1.95871	2.24264
0.892857	1.17391	5.628	0.862253	1.27273	3.26043
1.24891	3.21303	1.89902	1.16667	1.7901	2.62079
0.741667	1.52154	6.42533	1.23529	1.1295	3.33333
2.13333	2.78845	5.76287	1.44	1.65517	2.30164
1.2	2.04886	3.75831	1	1.10807	1.85582
0.892857	2.2819	5.34379	0.562452	1.04167	2.00478
1.22602	1.94444	4.57629	1.15	1.84388	3.4199
1.36842	3.4375	2.47097	0.648378	1.89474	2.30861
1.03841	2.08501	5.26462	1.40627	1.30769	3.86511
1.40982	2.42773	2.32432	0.697287	3.16694	3.39448
1.00059	2.60765	5.30887	1.2	0.805242	3.5
0.583333	1.85311	6.5641	0.839329	1.30729	3.07218
1.06397	3.25284	3.61013	1.16742	1.28	4.01079
1.16	1.8172	4.15321	1.26087	1	2.24529
1.30674	2.1383	4.45076	0.944077	1.92843	3.00073
0	0	0	0	0	0
1.52779	1.21119	4.22546	1.63775	2.91192	6.84016
1.57895	4.85914	4.03115	1.08142	2.19293	3.1022
1.24853	2.0185	6.07692	1.24769	2.11403	2.64361
1.15875	2.08208	4.27967	1.45525	2.12869	5.20103
1.24064	2.05232	3.78473	1.21704	2.0652	2.79395
0.790132	0.661244	5.70085	1.3913	1.91849	4.06887
1.72729	1.53366	3.47648	2.08542	1.48	2.96818
0.692042	2.35049	5.64829	0.766259	3.23984	3.82852
1.04167	3.2	4.68947	1.32258	2.51972	5.44957
1.25814	1.32523	3.83681	1.13727	3.0776	2.66667
1.29233	0.685714	5.28183	1.17911	1.6087	3.01553
0.767383	3.1484	4.20382	1.12903	0.792771	1.91354
0.513363	3.05556	3.12406	0.85	1.00195	2.10841
0.780872	2.7541	3.7482	0.925926	0.64229	3.06667
1.79851	2.81567	3.56065	0.565382	1.3194	1.63158
0.825315	3.57083	3.88947	1.14501	1.03173	3.59306
1.15385	3.86771	4.25172	1.19048	2.5342	1.92984
1.30313	2.19061	4.05897	1.22987	1.20332	4.08143
1.02632	1.60556	4.625	1.17173	1.83132	4.02461
0.456522	1.15173	3.58861	0.967243	2.37038	3.22459
1.36364	1.56522	4.37678	1.46429	3.2	2.97479
0.965685	1.49806	4.8005	1.8125	2.07457	3.97221
0.79056	0.784504	4.49173	1.08	2.11483	3.75209
0.927975	1.45623	3.47912	1.71429	2.34272	4.38329
1.50083	2.91397	7.93843	1.08	2.37368	2.92756
0.848485	1.17634	8.09201	0.785714	3.1227	5.12392
0.54717	1.64168	4.38844	1.07692	3.64963	2.95487
1.03632	1.06325	5.72143	1.64794	0.871179	1.94525
1.29525	0.806023	1.5	0.772512	2.83822	1.32061
0.888543	2.2	2.85765	0.774471	4.92437	3.05942
1.30093	2.39487	4.92619	0.7	2.36772	2.09075
1.59471	1.21625	3.77819	2.99422	3.03006	2.25866
1.27273	1.73684	5.60338	2.25704	2.04986	4.26436
1.53658	1.41543	5.24286	1.22727	3.35706	2.79831
1.85666	1.48276	6.29377	0.651927	3.52254	2.23606
1.13043	1.36666	6.11623	0.7	3.4673	4.56634
0.963666	2.1783	4.24675	2.0011	2.11896	1.88812
1.25926	1.18221	6.02714	0.627168	2.50468	4.55682
2	1.08681	6.14739	0.591924	4.46485	2.53215
1.12673	1	4.79382	1.80052	4.09321	3.84787
1.07762	1.12402	4.12947	1.51965	2.7814	3.51606
1.59091	1.25837	2.95162	1.08333	2.96198	2.47006
0.486074	1.06716	2.75311	1.4405	3.70489	3.83333
0.523423	1.01332	3.1659	0.738388	1.07327	3.32944
0.588235	1.27355	4.9782	1.43293	0.414388	1.885
0.689655	1.81875	3.5455	1.26161	0.474421	2.61544
0.92	1.4831	5.03262	0.557537	0.427001	3.22269
0.369799	1.86262	5.2715	0.862069	0.368473	1.8208
0.246205	1.0723	4.87234	1.39288	0.552443	5.86364
0.566724	1.07076	4.49443	2.53155	0.56621	4.78571
