# Supplementary material for: The SWELL1-LRRC8 complex regulates endothelial AKT-eNOS signaling and vascular function
Source: eLife. 2021 Feb 25;10:e61313. doi: 10.7554/eLife.61313 (PMC7997661; doi:10.7554/eLife.61313)
Supplement: Figure 5—source data 4. [file elife-61313-fig5-data4.xlsx]

## Sheet: Sheet1
si-SCR	si-SWELL1
0.141194	0.116047
0.130517	0.116047
0.125521	0.115392
0.123332	0.109276
0.121015	0.10842
0.11858	0.108284
0.117595	0.108284
0.115422	0.104676
0.110642	0.100332
0.109456	0.10008
0.109249	0.0996639
0.105427	0.0975361
0.105294	0.0955396
0.104669	0.0922167
0.103731	0.0918819
0.103397	0.0909208
0.102013	0.090216
0.0982681	0.0886632
0.0978951	0.088075
0.0968139	0.0876597
0.0921868	0.0866257
0.0898861	0.0859007
0.0897278	0.0813826
0.0886771	0.0787201
0.0886681	0.0778729
0.0883049	0.0767667
0.087525	0.0749944
0.0872688	0.0749944
0.0865778	0.0739514
0.0864951	0.0733243
0.0863292	0.0704882
0.0857424	0.0644194
0.0844958	0.0631812
0.0831493	0.0620757
0.0827382	0.0617875
0.0786243	0.0606715
0.0779396	0.0606701
0.0764361	0.059284
0.0745347	0.0583257
0.0710715	0.0579306
0.0697437	0.057741
0.0689757	0.0561806
0.0672979	0.0552424
0.0661507	0.0545771
0.0660944	0.0538076
0.0655681	0.0534208
0.0650785	0.0533049
0.0649681	0.0516236
0.0608035	0.0504257
0.0602104	0.0495722
0.0584715	0.0484958
0.0576306	0.0471715
0.0571917	0.046891
0.0562458	0.0465097
0.0561979	0.039091
0.0556437	0.0377576
0.0545042	0.0374653
0.0528951	0.0362153
0.0510611	0.036175
0.0505299	0.0344208
0.0437514	0.0338785
0.0379722	0.033616
0.150094	0.0314785
0.12857	0.103672
0.124706	0.0921597
0.123578	0.0869479
0.116793	0.0823799
0.116786	0.0818125
0.107053	0.0804694
0.104401	0.0780785
0.103997	0.0770306
0.103247	0.0735646
0.100409	0.0708542
0.0989014	0.0664187
0.0941618	0.0637708
0.0932722	0.0624368
0.0891507	0.0621215
	0.0447229
