# Supplementary material for: The SWELL1-LRRC8 complex regulates endothelial AKT-eNOS signaling and vascular function
Source: eLife. 2021 Feb 25;10:e61313. doi: 10.7554/eLife.61313 (PMC7997661; doi:10.7554/eLife.61313)
Supplement: Figure 5—source data 5. [file elife-61313-fig5-data5.xlsx]

## Sheet: Sheet1
siSCR no flow	siSCR 2h flow	siswell1 no flow	siswell1 2hr flow
720.25	2682.14	654.73	773.762
786.579	1524.62	632.891	1328.43
315.323	1725.77	1102.16	2570.39
1653.93	3436.99	1050.23	1133.76
634.897	4322.89	1011.58	1278.03
771.607	1841.46	1430.61	1019.99
2099.75	1987.16	2565.4	656.136
1340.83	4420.68	1355.85	3063.49
728.165	1308.07	1425.33	1198.34
460.482	4062.33	1283.13	256.885
669.934	1875.73	1314.88	1671.29
1590.49	2157.77	1585.5	1242.82
1286.71	1525.04	977.343	1424.31
909.416	2264.93	1096.98	1052.99
750.795	2592.15	868.997	1352.08
1519.94	1612.85	774.012	1562.98
1862.64	2064.06	1490.05	1507.96
2321.05	1559.89	1627.32	1052.05
1693.54	2015.39	751.377	1771.91
1013.47	1785.85	917.997	1522.38
1654.74	1226.39	2074.03	914.137
1358.22	2301.91	627.768	1680.29
1535.66	1624.13	1439.79	2001.62
1089.38	2088.82	1166.8	690.409
1282.5	1284.58	870.481	1097.49
1530.86	1727.81	1125.25	1349.57
1779.29	2968.65	2413.63	1634.7
1284.5	1158.87	1063.84	1486.95
1657.16	1685.44	975.245	2725.2
1392.43	1367.62	789.569	945.342
849.071	1804.41	1215.31	1384.88
1497.2	1842.48	1160.38	2391.57
1032.41	2076	1373.43	948.124
1331.58	1617.33	1200.93	2239.54
807.892	2147.63	1061.7	765.965
965.319	2070.01	1305.72	2750.29
991.28	3483.58	1454.83	1968.96
2626.59	1315.96	1114.84	1395.87
1198.99	2411.81	1574.17	1290.39
2308.24	2039.16	1015.52	1717.58
1388.55	2293.64	1014.16	2186.87
1094.03	1281.19	867.789	837.578
1071.94	3848.57	788.082	1453.09
1087.1	1213.93	2327.25	2392.74
1433.92	2461.88	994.397	1665.87
1863.38	2156.61	2096.1	1528.78
1014.64	2475.31	1139.75	2986.57
1125.21	1025.48	1984.17	1473.21
1162.87	3020.66	1197.89	1813.53
1985.61	2007.75	1076.59	1264.17
506.375	1405.81	1696.01	2814.19
979.25	1498.47	831.721	942.101
1087.84	1144.85	909.263	2214.18
745.845	2383.31	976.898	2015.29
1581.92	1408.61	789.21	1210.85
1455.59	2353.37	605.814	1454.77
1914.16	1938.85	714.489	2055.46
1935.66	2116.8	916.233	1227.6
1388.51	1438.01	944.375	1277.13
1092.09	1403.95	1877.01	1668.53
354.187	1676.67	1098.33	1508.47
748.247	1771.74	1211.79	1438.26
825.706	1446.53	1165.21	1031.61
1389.31	2994.6	2661.08	953.529
1530.87	1639.2	1831.33	2153.11
750.145	1809.15	1991.92	937.264
1419.13	2150.54	1398.37	1237.31
1517.03	1285.66	1374.42	1745.54
995.848	948.928	1439.1	1447.22
1654.93	3057.32	1375.24	997.905
748.275	1732.31	1581.92	2789.66
1317.57	3095.59	2083.77	1579.43
1642.92	3245.68	598.034	967.423
1255.97	2430.47	2510.24	171.307
1644.33	1558.69	1167.42	1021.15
1669.88	1127.2	1581.54	489.89
1994.51	2161.64	1110.03	1497.34
1634.78	1327.91	1161.62	1294.94
1105.52	2074.33	1433.05	603.512
1081.63	1979.06	1383.82	1702.95
550.906	532.353	1441.22	1019.04
785.565	1601.72	859.038	1343.4
496.434	728.521	431.681	1428.42
466.277	836.955	697.535	1182
435.348	751.487	728.883	2193.43
1232.89	456.224	1163.17	911.474
1103.82	2440.07	1229.36	784.375
178.257	1413.43	1402.43	1792.35
1334.55	2644.36	841.923	1855.51
1602.48	1688.27	906.355	1182.03
1633.01	1067.13	443.559	924.987
782.601	1154.14	496.949	1569.8
1490.71	1226.88	810.017	862.994
1465.57	1187.13	1031.94	1631.03
858.775	2929.27	538.077	1345.8
1745.61	1456.19	1059.97	1978.18
1264.34	1696.29	924.331	1961.89
1749.71	1676.51	1238.35	1752.69
946.13	1229.86	753.728	1704.27
1224.33	2139.3	1773.42	939.386
1060	900
840	1460
1460	1200
1360	920
640	1460
540	1440
560	1160
360	1140
1460	1180
1460	1180
1000	1140
840	1460
720	980
620	1460
600	1380
1200	1460
460	1460
1180	900
560	1460
1420	1460
1460	1320
1120	1340
860	920
1180	1260
1080	1460
880	1460
1020	940
1040	1180
1160	1060
860	1020
840	1460
700	1460
620	1400
1460	1340
1080	1100
1260	560
920	1460
1460	1400
1220	1260
1080	1320
1000	1460
1460	1360
1120	1460
1280	1160
780	1380
200	1460
540	1160
1240	1260
1320	1380
580	1360
480	1460
560	1460
680	1100
1460	500
1200	1380
1340	1360
840	1420
820	1340
1280	980
920	1460
840	1460
760	1300
620	1460
820	1140
1460	1460
1460	1440
1260	1340
1380	1420
