# Supplementary material for: The SWELL1-LRRC8 complex regulates endothelial AKT-eNOS signaling and vascular function
Source: eLife. 2021 Feb 25;10:e61313. doi: 10.7554/eLife.61313 (PMC7997661; doi:10.7554/eLife.61313)
Supplement: Figure 5—source data 6. [file elife-61313-fig5-data6.xlsx]

## Sheet: Sheet1
siSCr no flow	siSCR 2 hr flow	siswell1 no flow	siswell1 2 hr flow
1510.86	3495.39	1154.02	3880.11
1214.08	3095.92	1731.18	1826.03
1061.79	5362.75	1826.25	1733.58
1527.72	4145.61	1349.93	2625.99
1533.2	4079.78	1895.53	2815.86
1687.59	5475.53	1404.75	4096.89
1370.55	2877.57	1814.94	3367.51
1448.86	3043.88	3020.35	2744.85
2045.71	2235.24	1815.08	2657.56
2728.34	2557.84	1194.93	4664.6
1524.57	3910.28	851.686	3153.28
1507.76	3030.25	1043.95	3256.84
1337.83	2084.12	1242.15	3309.49
1655.35	2890.31	1172.59	2755.1
1611.26	2592.8	1975.96	2095.49
1893.87	3502.81	2240.93	2076.61
1149.26	3133	1792.94	3655.61
1256.26	3526.37	2444.86	2698.34
836.3	2529.86	1891.3	2261.75
1125.18	3220.86	2367.74	2339.93
2002.75	2529.47	2051.73	3144.79
1750.84	3424.19	1081.18	3391.72
2190.21	4601.39	1196.18	2111.12
1533.68	3079.79	1480.28	3408.27
1072.58	2672.74	1639.78	3439.77
1341.94	3431.31	1365.29	2404.64
1440.4	3003.3	1700.55	2786.72
1384.68	3196.65	1152.77	2001.04
1639.71	2249.63	1214.62	1420.88
1265.7	3728.75	1436.28	2687.7
1159.32	3346.72	1687.55	2476.52
1766.65	2754.92	1555.26	1817.07
1172.33	2718.1	2020.63	2605.47
1469.63	3324.87	1338.6	3806.12
1802.42	4122.59	1123.51	2465.31
1891.08	3555.69	956.233	3442.52
1589.32	2108.32	1770.39	2799.32
1251.66	3646.61	1398.94	3151.64
1567.59	4150.95	1962.22	3291.52
1766.16	2582.62	1136.41	2054.28
1813.76	3292.31	2222.69	1956
1520.48	2217.84	1569.25	1969.22
1540.01	2624.87	1082.48	1587.35
2098.39	3590.99	2058.68	2155.34
1854.92	3327.05	1736.26	1653.24
1505.06	3810.85	1848.7	2516.28
1831.15	2848.64	1050.27	1950.78
1010.41	3829.27	1019.26	3542.45
2144.03	3137.16	719.397	2216.03
2099.53	2352.51	2372.31	2595.54
608.303	2782.49	1374.73	2540.61
794.912	1703.9	890.042	1768.08
1143.75	2227.08	1273.1	2345.33
676.818	1667.92	1351.75	3718.17
1745.68	3137.19	1795.86	2008.06
988.962	3084.59	1417.86	2962.76
1218.44	2487.15	915.34	3096.92
2067.44	2295.7	2833.79	2732.86
1152.89	3127.45	539.357	2242.74
2057.76	2375.3	2016.59	2264.92
1658.04	3634.98	2014.36	2917.25
2808.87	3540.98	1712.32	3319.15
1687.05	3233.66	1673.55	2231.27
1842.02	3373.16	747.78	1989.23
1775.84	3516.22	1145.22	1538.02
2027.41	3218.74	1409.55	1827.94
2056.09	3660.1	1325.98	2886.94
1718.73	3137.16	1247.47	3719.23
1597.26	5560.28	1918.68	1988.36
1402.03	3391.83	2758.39	2903.47
1810.53	1905.52	2372.56	2114.35
2465.21	3656.44	1504.75	3487.03
2489.77	3793.45	1070.02	3029.42
1947.26	3761.4	1734.09	2360.45
2611.56	4082.69	1205.4	2830.31
1815.73	4453.89	2445.59	1444.87
2479.58	3754.27	2359.27	1954.25
1856.48	2691.31	1983.72	4946.83
2017.07	3682.67	2246.63	2472.46
2646.4	4033.74	1788.72	3531.2
2068.69	3322.76	1078.47	1391.87
2097.41	3344.23	3127.72	1887.78
1810.49	5083.29	1229.35	2182.6
1309.46	4729.74	1556.83	1847.07
1544.71	3712.58	1251	1908.25
1871.38	3269.5	1084.24	1594.17
1279.69	3562.95	1777.97	1846.99
1077.67	3569.41	1428.67	1267.81
933.729	2882.34	1642.7	1002.84
1828.19	3299.8	2323.37	1547.39
1190.08	2216.06	1130.6	1850.39
1185.32	4150.55	654.642	1282.01
924.721	4200.78	1858.54	1803.5
1331.69	2174.13	1111.78	1494.24
2243.16	1731.67	562.398	2828.69
1565.07	4281.03	581.772	2256.12
1353.16	1823.85	1305.47	2992.21
1020.75	2166.47	1023.51	2155.86
1324.12	2834.3	967.412	1923.08
1344.49	2520.04	977.757	2039.63
		2685.25
		2453.71
		1789.18
		1827.04
		1515.72
		2274.68
		2812.7
		2150.28
		3444.31
		2644.92
