# Supplementary material for: The SWELL1-LRRC8 complex regulates endothelial AKT-eNOS signaling and vascular function
Source: eLife. 2021 Feb 25;10:e61313. doi: 10.7554/eLife.61313 (PMC7997661; doi:10.7554/eLife.61313)
Supplement: Figure 5—source data 7. [file elife-61313-fig5-data7.xlsx]

## Sheet: Sheet1
siSCR no flow	siSCR 24 hr flow	siswell1 no flow	siswell1 24 h flow
1279.35	3050.89	944.685	976.454
2743.1	2724.25	1345.35	997.303
2143.38	2957.34	1103.11	1772.81
1406.8	866.297	871.819	910.945
2278.7	1745.07	2460.37	2523.08
1279.45	2122.54	2361.26	1288.59
1829.54	2411.8	1229.46	1578.71
1629.62	2542.14	2734.89	1542.49
1746.32	2876.85	2446.4	1224.85
837.843	2862.17	1151.36	881.21
1615	2153.62	550.066	1574.8
830.426	2696.62	343.602	1502.1
2635.98	1929.05	808.424	1171.38
1863.59	1062.54	1154.93	1406.23
2286.31	2331.09	2001.51	947.844
1390.04	693.575	1267.41	963.586
1449.4	2791.66	1897.51	1268.78
1611.78	3462.26	1774.28	1121.69
2324	3614.98	1975.35	2812.76
2119.64	2406.98	1694.47	974.327
1185.15	2161.72	2002.32	2634.06
1038.73	1606.07	1353.52	962.804
704.155	2136.1	1618.39	1402.58
1145.66	875.846	1881.01	1573.01
1615.38	1438.78	2526.35	1155.4
1921.51	1432.5	1772.42	1069.65
2205.02	2157.15	2024.82	1237.26
1788.1	3401.34	1738.22	858.939
2337.62	1592.13	913.622	1773.47
1881.49	1028.02	2223.06	994.999
1363.94	2298.62	1475.3	1960.94
1667.77	1445.96	1696	1022.51
2418.99	1996.57	1159.98	600.391
454.56	1650.29	392.193	743.254
1559.41	865.109	1452.59	621.037
1509.08	1507.41	1153.52	1450.17
1705.84	1394.89	1988.83	1460.84
2202.56	1687.27	1379.21	1484.78
1224.51	1948.26	2084.21	2316.57
1317.18	2593.29	1087.34	3404.86
2057.72	2610.19	1583.77	1874.54
1543.34	1632.77	1628.62	589.685
1359.57	2615.51	1416.12	1139.65
1766.6	1360.72	855.057	388.951
1720.97	756.582	1418.81	637.684
1580.23	1115.23	2608.12	230.347
1720.35	1518.3	1092.78	590.806
2244.77	885.606	2355.17	1264.8
1667.95	1167.7	1138.63	1088.68
895.135	2231.11	1614.31	565.221
867.636	2515.58	1001.26	589.281
1418.21	1860.5	1350.94	1046.86
1675.41	2399.29	1852.32	857.79
1050.1	2406.46	1494.86	1296.74
390.672	1895.09	1284.36	1170.82
1250.35	1724.48	1724.07	587.05
1120.29	3992.7	1744.99	2093.99
2063.73	1189.76	1968.6	1620.05
1238.7	2159.65	1856.95	901.472
1563.11	1650.96	2416.39	924.482
2518.9	1613.68	1635.95	784.509
959.921	2569.27	1109.86	796.658
2753.57	1268.13	877.582	853.729
1962.43	1347.2	1614.09	652.557
2242.65	2140.42	967.275	1180.1
1376.33	1865.28	681.639	1188.69
2094.16	3090.51	1032.97	1263.42
541.113	2324.5	1670.04	675.972
1581.34	1311.48	2907.24	1308.48
1470.17	1516.27	1245.76	1005.35
1559.03	2971.02	1421.95	1386.35
652.002	1205.28	494.17	238.003
1550.98	1144.29	1548.57	514.476
1629.64	2584.34	1836.64	830.648
1185.28	2201.67	1586.52	2028.78
1880.24	2164.15	1838.94	681.565
1696.35	2616.86	1708.84	946.227
1388.24	1412.94	824.103	1052.83
1225.13	4095.97	1049.52	1148.13
1474.64	1903.29	1275.89	1006.67
1697.62	2382.99	1983.19	330.464
1477.71	1645.97	1104.34	780.882
1732.3	2003.97	1554.6	609.132
2466.37	1544.53	2672.34	1712.57
1022.65	3018.67	1902.42	858.198
1655.27	1419.13	1122.49	1685.31
2179.5	2222.78	1208.69	1804.39
1621.13	2020.32	472.758	1574.18
864.41	2861.74	1322.5	1941.38
1558.14	1335.37	1097.87	1388.9
933.356	2395.46	969.791	990.283
1896.17	1739.58	737.753	701.513
325.467	2628.43	1306.29	1738.42
814.163	1091.93	418.718	1529.36
808.616	2052.35	1331.33	1269.62
2241.14	2283.4	2447.1	2639.16
1762.21	3739.5	1470.77	1350.4
1942.48	1514.06	1388.17	1307.85
1273.72	1497.82	1590.22	1272.72
1819.35	1425.2	1327.02	1728.02
2047.48	1523.1	1574.03	775.927
1178.53	2177.78	1739.77	879.317
1773.72	2171.12	828.115	842.634
2446.24	2612.14	747.195	1480.06
1406.48	4403.62	1527.94	1297.94
1513.01	2597.59	988.565	1181.9
1483.68	2070.01	2399.45	1331.97
1161.51	1855.77	1185.64	1779.2
2198.24	1019.19	2320.32	1309.91
1746.44	2086.47	1959.97	562.471
