# Supplementary material for: The SWELL1-LRRC8 complex regulates endothelial AKT-eNOS signaling and vascular function
Source: eLife. 2021 Feb 25;10:e61313. doi: 10.7554/eLife.61313 (PMC7997661; doi:10.7554/eLife.61313)
Supplement: Figure 5—source data 8. [file elife-61313-fig5-data8.xlsx]

## Sheet: Sheet1
siscr no flow	siscr 24 hr flow	siswell1 no flow	siswell1 24 hr flow
1823.62	2941.45	2445.04	3728.75
2543.53	5665.68	2763.73	3217.82
2634.37	2436.71	1941.48	3098.73
1204.43	3458.49	1876.13	2826.45
1295.52	5192.66	2256.84	4483.62
1573.13	3572.61	1914.83	2542.71
2175.67	3430.96	2617.85	3808.06
2393.47	5252.38	1298.57	3815.03
2121.34	3113.4	1952.24	3350.04
2768.49	3895.25	1218.24	2613.91
1801.9	3211.85	1931.28	3311.93
847.858	2035.52	3074.89	2753.49
821.132	1705.21	2234.72	2499.08
1376.01	1957.72	1601.31	1981.43
1527.74	3819.41	1134.7	2956.17
1556.56	3027.05	1781.32	1634.07
1439.58	3325.71	2299.46	1929.19
2184.22	1983.12	2190.33	3074.42
2043.9	2629.06	1073.91	2640.78
1777.61	2441.65	1748.91	1919.75
203.639	2764.03	2017.62	1878.88
1482.57	2110.66	2340.88	3023.45
1497.49	2367.5	2403.85	2146.94
1342.93	2035.27	438.476	963.552
1316.52	3424.72	1629.92	1439.34
1610.91	2526.27	2865.53	2303.87
1776.49	2136.62	2008.53	1403.87
1872.78	4977.94	1861.99	1918.7
2016.61	2720.75	920.691	2024.19
944.714	3116.74	1768.2	2038.55
1798.18	3102.26	2878.72	2193.22
1724.55	4220.78	1086.09	2089.07
697.429	3015.09	1849.71	1258.74
1910.06	2210.15	1295.16	1825.21
1177.71	2374.71	3481.97	2019.68
1501.08	3121.88	2624.08	2054.82
1810.4	2514.44	851.296	2863.36
1577.25	2771.54	1152.12	2484.61
1498.15	3063.05	1338.63	625.097
3145.01	3329.14	2212.32	2533.82
2415.22	3566.8	1563.21	2480.62
1850.9	3560.72	1266.68	2669.2
1635.37	2156.27	1323.7	1564.42
2314.76	4587.81	1671.29	1887.39
1841.25	3415.79	1683.91	1864.65
2449.25	3494.84	2024.49	2494.02
1733.7	3747.73	1529.47	1658.88
1812.44	1889.62	1138.69	1223.25
1893.2	2984.72	1334.31	2375.95
1843.53	3500.04	1836.47	1766.58
1580.14	4236.73	1836.03	2141.44
1608.8	3676.89	580.059	2303.98
1485.03	3900.76	950.195	2569.38
2307.57	3685.97	1132.67	3807.09
2483.03	4131.46	2687.18	2063.11
1627.39	2713.35	1910.76	2479.73
1985.13	3106.72	1212.1	1413.14
2062.21	3362.42	2204.68	1963.26
1771.15	3077.41	1204.08	2152.52
1617.32	3520.67	1659.67	3069.88
1948.94	3688.67	1520.64	2084.16
1097.7	2515.01	2050.67	2246.26
2203.52	2650.13	2311.73	2178.26
2244.94	2780.05	1744.94	1950.06
1518.68	1793.31	1237.86	1653.89
1390.37	3470.97	1925.63	2662.44
2678.55	3087.69	1905.23	2767.39
2483.11	3673.29	1800.81	1002.71
1623.31	4537.31	2814.23	3646.23
1304.17	1761.23	2426.8	1783.18
1353.28	2360.16	2717.36	1940.14
1743.35	2890.84	1721.98	2228.27
1783.4	3150.39	2015.23	2105.33
1106.75	2461.55	1725.86	2437.85
1818.35	3328.2	2340.45	1102.06
1299.07	3060.98	1017.24	1236.97
1176.59	4305.31	2109.88	1961.36
2274.32	4180.31	980.566	2291.71
2234.83	2693.42	1915.87	2461.61
2155.01	2471.67	1177.02	2004.72
1173.78	2298.07	1603.74	990.692
1929.97	2192.36	1801.2	2372.3
976.886	3166.16	1597.1	1574.68
1250.76	2683.32	1111.32	2644.77
2091.05	3749.99	1328.35	2683.96
1713.6	3190.83	829.782	1383.64
2150.57	2820.17	1917.96	1704.36
1442.65	2418.45	3111.91	1813.88
2028.37	3198.37	2282.98	1689.82
1665.27	3274.45	1603.9	3228.22
2305.01	2362.61	1440.95	1634.66
2143.47	2764.55	8.747	2101.45
1096.97	2504.7	1552.15	1551.18
1960.19	2910.76	1122.17	1276.72
2097.81	3557	556.688	1972.25
2633.63	2372.79	1785.13	2364.39
1742.15	2319.43	2372.41	1616.33
1614.37	2926.23	1548.72	1261.3
1171.06	2492.66	1950.35	2531.79
1204.27	1943.02	1658.47	3058.21
1806.86	2685.25	1952.42	1434.44
1107.13	2453.71	1881.8	1543.76
1866.44	1789.18	1541.69	1441.29
2780.76	1827.04	2495.54	1589.85
1502.55	1515.72	1883.2	1198.47
1689.31	2274.68	1089.8	1557.98
1073.19	2812.7	2329.3	1643.54
1346.15	2150.28	2041.97	1807.43
2724.55	3444.31	1867.1	1968.45
1639.44	2644.92	2209.66	2459.77
