# Supplementary material for: The SWELL1-LRRC8 complex regulates endothelial AKT-eNOS signaling and vascular function
Source: eLife. 2021 Feb 25;10:e61313. doi: 10.7554/eLife.61313 (PMC7997661; doi:10.7554/eLife.61313)
Supplement: Figure 6—source data 1. [file elife-61313-fig6-data1.xlsx]

## Sheet: Sheet1
Gene	shRNA			shSWELL1
LRRC8A	112.147	110.009	102.424	21.3108	18.0754	22.9872
LRRC8D	12.5948	12.4241	13.7557	11.0165	10.7481	11.5505
LRRC8E	2.78841	2.53644	2.8183	1.4481	1.95973	1.55194
NOS3	74.5171	76.0722	72.3	38.7687	39.9245	43.0467
ICAM1	58.5408	59.0657	53.67	28.5248	34.5349	29.0585
FLT1	21.6389	21.1887	21.2499	17.2361	17.4903	17.5694
CDH5	89.8304	87.6541	88.4102	111.831	114.078	108.305
PECAM1	40.5458	41.7457	43.2765	81.3582	87.1296	76.4557
KDR	23.2571	22.2218	21.3824	30.814	36.0146	29.6661
VEGFA	10.593	10.6058	12.0125	17.4475	20.7471	16.0936
EPOR	10.414	10.8318	12.0151	14.1274	13.9912	12.1262
CD36	6.19783	7.76576	7.95457	24.5963	28.0925	22.5635
VWF	1.17451	1.21944	1.25584	1.46167	1.59846	1.61002
PIEZO1	45.1129	43.6214	41.3236	46.4084	47.0616	49.1203
PIEZO2	0.01	0.01	0.01	0.01	0.01	0.01
TRPV4	0.0193477	0.0190214	0.01	0.0169549	0.01	0.01
