# Supplementary material for: The SWELL1-LRRC8 complex regulates endothelial AKT-eNOS signaling and vascular function
Source: eLife. 2021 Feb 25;10:e61313. doi: 10.7554/eLife.61313 (PMC7997661; doi:10.7554/eLife.61313)
Supplement: Figure 6—source data 2. [file elife-61313-fig6-data2.xlsx]

## Sheet: Sheet1
		HUVEC					C2C12 myotube				3T3-F442A adipocyte
LRRC8A	LRRC8B	LRRC8C	LRRC8D	LRRC8E	LRRC8A	LRRC8B	LRRC8D	LRRC8E	LRRC8A	LRRC8B	LRRC8C	LRRC8D	LRRC8E
108.193	0.488456	4.023	12.9248	2.71439	7.2	6	5	1.8	33.6	1.6	2.7	5.3	0.0005
