# Supplementary material for: The SWELL1-LRRC8 complex regulates endothelial AKT-eNOS signaling and vascular function
Source: eLife. 2021 Feb 25;10:e61313. doi: 10.7554/eLife.61313 (PMC7997661; doi:10.7554/eLife.61313)
Supplement: Figure 7—source data 1. [file elife-61313-fig7-data1.xlsx]

## Sheet: Sheet1
WT outward	SWELL1 KO outward	WT inward	SWELL1 KO inward
45.5755	4.21325	-7.28365	-4.64027
52.3081	5.50279	-9.16982	-6.83264
22.7358	4.95173	-10.8178	-5.6987
