# Supplementary material for: The SWELL1-LRRC8 complex regulates endothelial AKT-eNOS signaling and vascular function
Source: eLife. 2021 Feb 25;10:e61313. doi: 10.7554/eLife.61313 (PMC7997661; doi:10.7554/eLife.61313)
Supplement: Figure 7—source data 2. [file elife-61313-fig7-data2.xlsx]

## Sheet: Sheet1
WT		eSWELL1 KO
6.588		3.258
10.737		0.923
6.611		3.199
9.21		0.702
12.423		3.413
