# Supplementary material for: The SWELL1-LRRC8 complex regulates endothelial AKT-eNOS signaling and vascular function
Source: eLife. 2021 Feb 25;10:e61313. doi: 10.7554/eLife.61313 (PMC7997661; doi:10.7554/eLife.61313)
Supplement: Figure 7—source data 3. [file elife-61313-fig7-data3.xlsx]

## Sheet: Sheet1
eSWELL1 KO	WT
117.006	105.373
114.487	117.76
115.896	105.327
95.5808	101.956
108.065	110.435
