# Supplementary material for: The SWELL1-LRRC8 complex regulates endothelial AKT-eNOS signaling and vascular function
Source: eLife. 2021 Feb 25;10:e61313. doi: 10.7554/eLife.61313 (PMC7997661; doi:10.7554/eLife.61313)
Supplement: Figure 7—source data 4. [file elife-61313-fig7-data4.xlsx]

## Sheet: Sheet1
eSWELL1 KO	WT
99.6637	102.025
118.96	96.2607
111.961	112.399
109.134	96.0823
120.204	93.3948
108.674	102.676
109.842	107.501
109.667
97.1774
100.345
112.131
104.723
