# Supplementary material for: The SWELL1-LRRC8 complex regulates endothelial AKT-eNOS signaling and vascular function
Source: eLife. 2021 Feb 25;10:e61313. doi: 10.7554/eLife.61313 (PMC7997661; doi:10.7554/eLife.61313)
Supplement: Figure 7—source data 5. [file elife-61313-fig7-data5.xlsx]

## Sheet: Sheet1
	eSWELL1-WT						eSWELL1- KO
Basal	110	110	108	114			117	118	123	105	110
Ango II	140.4	130.83	123.2	119.96			151.6	151	146	144.66	139.1
