# Supplementary material for: The SWELL1-LRRC8 complex regulates endothelial AKT-eNOS signaling and vascular function
Source: eLife. 2021 Feb 25;10:e61313. doi: 10.7554/eLife.61313 (PMC7997661; doi:10.7554/eLife.61313)
Supplement: Figure 8—figure supplement 1—source data 1. [file elife-61313-fig8-figsupp1-data1.xlsx]

## Sheet: Sheet1
Time (s)	WT											KO
0	1.696	2.339	3.592	1.452	20.922	1.447	16.594	5.149	2.25	2.575	2.575	1.739	1.623	2.655	1.887	2.759	1.42	1.859	2.695	3.146	5.949	2.058
60	3.669	2.869	10.982	2.87	27.224	16.306	21.554	7.038	9.632	9.046	9.046	4.756	4.258	20.762	4.885	7.912	2.628	7.504	6.439	7.845	26.068	4.386
120	6.152	4.379	18.528	4.299	30.989	34.058	25.392	10.364	17.254	15.881	15.881	9.17	7.163	37.238	9.532	13.794	5.425	12.895	10.971	10.785	36.75	7.43
180	10.625	21.102	40.755	5.278	35.568	47.55	28.239	13.76	32.334	28.165	28.165	15.57	14.921	46.947	11.858	18.73	17.096	13.813	14.102	12.869	44.303	8.393
240	22.946	24.48	46.606	6.618	35.783	56.83	31.854	21.687	37.447	38.483	38.483	24.259	18.295	52.958	16.258	24.616	20.115	16.799	22.072	14.253	50.724	14.582
300	30.741	28.422	55.509	12.614	38.911	66.479	37.975	25.018	41.891	40.581	40.581	30.82	25.981	62.772	19.726	22.298	24.788	22.446	24.964	16.397	58.316	15.18
360	31.412	38.075	65.275	16.428	38.935	71.457	41.446	29.084	45.916	47.875	47.875	38.08	27.603	67.744	24.25	23.372	30.723	29.293	30.499	18.286	65.619	19.653
420	34.838	40.787	72.226	22.623	43.864	79.627	43.605	34.054	49.778	53.595	53.595	44.655	33.852	73.027	28.46	29.142	31.258	37.492	36.308	20.231	70.218	23.541
480	39.395	45.468	78.18	28.133	43.317					59.916	59.916	46.284	38.21	80.291	33.641	52.799	32.11	42.822	41.272	22.338		26.891
