# Supplementary material for: The SWELL1-LRRC8 complex regulates endothelial AKT-eNOS signaling and vascular function
Source: eLife. 2021 Feb 25;10:e61313. doi: 10.7554/eLife.61313 (PMC7997661; doi:10.7554/eLife.61313)
Supplement: Figure 8—figure supplement 1—source data 2. [file elife-61313-fig8-figsupp1-data2.xlsx]

## Sheet: Sheet1
WT	KO
47	46
39	39
41	27
64	28
20	30
42	30
36	55
43	43
48	51
66	40
36	50
33	38
35	33
47	42
58	34
40	57
34	53
37	40
60	47
73	52
48	60
57	42
50	39
73	37
88	41
46	37
59	46
71	38
75	30
92	52
57	52
67	38
63	40
60	36
73	52
67	27
70	30
54	24
81	31
68	30
38	47
44	21
43	27
53	24
38	31
35	31
37	49
47	57
43	36
72	50
36	54
38	32
41	37
61	36
53	43
79	43
61	31
43	51
58	53
46	50
39
27
28
30
30
55
43
51
40
50
38
33
42
34
57
53
40
47
52
60
42
39
37
41
37
46
38
30
52
52
38
40
36
52
27
30
24
31
30
47
21
27
24
31
31
49
57
36
50
54
32
37
36
43
43
31
51
53
50
