# Supplementary material for: The SWELL1-LRRC8 complex regulates endothelial AKT-eNOS signaling and vascular function
Source: eLife. 2021 Feb 25;10:e61313. doi: 10.7554/eLife.61313 (PMC7997661; doi:10.7554/eLife.61313)
Supplement: Figure 8—figure supplement 1—source data 3. [file elife-61313-fig8-figsupp1-data3.xlsx]

## Sheet: Sheet1
WT	eSWELL1 KO
29	23
31	24
52	21
17	32
28	27
31	33
43	37
23	21
58	40
17	19
24	23
14	26
32	27
30	18
17	15
41	15
25	30
24	20
41	20
27	42
15	20
30	33
40	27
40	15
47	27
43	29
48	23
52	13
77	18
24	15
14	22
38	24
31	25
42	19
45	18
41	19
28	17
46	19
48	19
35	20
31	27
21	15
25	17
20	15
31	17
24	20
27	14
27	17
24	7
22	11
27	10
22	12
21	12
33	17
35	13
34	15
19	18
31	14
39	19
43	20
