# Supplementary material for: The SWELL1-LRRC8 complex regulates endothelial AKT-eNOS signaling and vascular function
Source: eLife. 2021 Feb 25;10:e61313. doi: 10.7554/eLife.61313 (PMC7997661; doi:10.7554/eLife.61313)
Supplement: Figure 8—figure supplement 1—source data 4. [file elife-61313-fig8-figsupp1-data4.xlsx]

## Sheet: Sheet1
WT	eSWELL1 KO
1.78124	1.90746
1.7587	1.90732
1.75142	1.83417
1.93549	1.92587
1.90851	1.92076
1.96937	1.90336
1.83744	1.84452
1.84967	1.95581
1.97364
