# Supplementary material for: The SWELL1-LRRC8 complex regulates endothelial AKT-eNOS signaling and vascular function
Source: eLife. 2021 Feb 25;10:e61313. doi: 10.7554/eLife.61313 (PMC7997661; doi:10.7554/eLife.61313)
Supplement: Figure 8—figure supplement 1—source data 5. [file elife-61313-fig8-figsupp1-data5.xlsx]

## Sheet: Sheet1
WT	eSWELL1 KO
0.671149	0.488634
0.693466	0.48078
0.67332	0.577755
0.540381	0.514358
0.494825	0.514756
0.303115	0.519955
0.646996	0.641363
0.583114	0.479612
0.283446
