# Supplementary material for: The SWELL1-LRRC8 complex regulates endothelial AKT-eNOS signaling and vascular function
Source: eLife. 2021 Feb 25;10:e61313. doi: 10.7554/eLife.61313 (PMC7997661; doi:10.7554/eLife.61313)
Supplement: Figure 8—figure supplement 1—source data 6. [file elife-61313-fig8-figsupp1-data6.xlsx]

## Sheet: Sheet1
WT	eSWELL1 KO
0.291992	0.392804
0.296408	0.412504
0.289524	0.334488
0.382024	0.394224
0.394192	0.394644
0.582408	0.38924
0.319236	0.325124
0.348368	0.411724
0.591112
