# Supplementary material for: The SWELL1-LRRC8 complex regulates endothelial AKT-eNOS signaling and vascular function
Source: eLife. 2021 Feb 25;10:e61313. doi: 10.7554/eLife.61313 (PMC7997661; doi:10.7554/eLife.61313)
Supplement: Figure 8—figure supplement 1—source data 7. [file elife-61313-fig8-figsupp1-data7.xlsx]

## Sheet: Sheet1
WT	eSWELL1 KO
9	20
13	24
11	12
14	19
28	18
48	16
14	9
13	25
69
