# Supplementary material for: The SWELL1-LRRC8 complex regulates endothelial AKT-eNOS signaling and vascular function
Source: eLife. 2021 Feb 25;10:e61313. doi: 10.7554/eLife.61313 (PMC7997661; doi:10.7554/eLife.61313)
Supplement: Figure 8—figure supplement 1—source data 9. [file elife-61313-fig8-figsupp1-data9.xlsx]

## Sheet: Sheet1
WT	eSWELL1 KO
8.70713	11.5056
8.76	11.8019
9.10227	9.97274
10.5446	11.6054
11.9044	11.3215
16.4328	10.9705
9.5689	9.72807
9.7441	11.9565
18.152
