# Supplementary material for: The SWELL1-LRRC8 complex regulates endothelial AKT-eNOS signaling and vascular function
Source: eLife. 2021 Feb 25;10:e61313. doi: 10.7554/eLife.61313 (PMC7997661; doi:10.7554/eLife.61313)
Supplement: Figure 8—figure supplement 3—source data 1. [file elife-61313-fig8-figsupp3-data1.xlsx]

## Sheet: Sheet1
GTT		WT													eSWELL1 KO
0	0	223	224	186	204	200	172	237	228						200	179	233	143	171	203	208	179	227	208	197	180	250
5	5	304	278	278	312	216	284	320	301						229	200	249	187	264	253	255	272	277	309	245	317	382
15	15	394	370	341	364	255	357	501	370						308	259	411	305	396	320	380	361	378	403	194	443	591
30	30	357	340	353	378	305	279	402	405						315	229	450	309	392	264	322	296	580	413	291	451	552
60	60	239	230	275	206	226	188	270	268						212	191	305	204	258	293	261	220	315	321	253	244	369
90	90	184	173	199	146	200	161	204	238						167	154	217	140	180	264	210	200	226	168	224	176	280
120	120	148	169	169	128	178	144	163	213						164	131	156	142	179	213	159	154	177	144	186	172	204
ITT		WT													eSWELL1 KO
0	0	190	196	214	200	208	197	218	205						175	195	181	159	146	175	216	215	176	186	205	169	259
5	15	127	143	120	141	124	96	146	106						103	79	95	70	97	108	101	104	114	131	86	118	163
15	30	76	111	73	63	77	79	99	81						85	51	79	38	45	79	82	69	65	55	71	82	86
30	60	36	101	34	31	74	39	42	74						62	18	31	22	20	32	50	51	41	34	34	51	66
60	90	40	75	58	22	61	27	41	43						40	11	27	24	20	30	52	44	43	41	40	75	63
90	120	65	114	78	15	58	25	24	36						30	12	32	20	15	23	57	66	60	49	58	77	85
120
