# Supplementary material for: The SWELL1-LRRC8 complex regulates endothelial AKT-eNOS signaling and vascular function
Source: eLife. 2021 Feb 25;10:e61313. doi: 10.7554/eLife.61313 (PMC7997661; doi:10.7554/eLife.61313)
Supplement: Figure 8—figure supplement 4—source data 1. [file elife-61313-fig8-figsupp4-data1.xlsx]

## Sheet: Sheet2
Figure 8-Supplement4 Source Data
Total Fat (g)															Total Fat (g) Analysis
	Male															Male	Avg	STD	SEM	P value
	WT	CDH5_4924	CDH5_4925	CDH5_4939	CDH5_5069	CDH5_5070	CDH5_5079									WT	29.7667	4.2179	1.72195	0.781626
		34.3	24.1	25.2	30.3	31.4	33.3									KO	30.4714	4.6507	1.7578
																Female	Avg	STD	SEM	P value
	KO	CDH5_4930	CDH5_4931	CDH5_4937	CDH5_4940	CDH5_5067	CDH5_5068	CDH5_5080								WT	32.2857	5.66728	2.14203	0.0176777
		34.9	30.3	34.3	24.5	35.2	29.7	24.4								KO	39.2769	5.73282	1.59
	Female
	WT	CDH5_4928	CDH5_4929	CDH5_4932	CDH5_4936	CDH5_5140	CDH5_5141	CDH5_5071
		35.1	31.3	32.4	30.8	29.5	24.2	42.7
	KO	CDH5_5139	CDH5_5084	CDH5_4926	CDH5_4933	CDH5_4934	CDH5_4935	CDH5_4941	CDH5_4942	CDH5_4943	CDH5_4944	CDH5_4982	CDH5_4983	CDH5_4984
		39.1	30.7	29.8	40	37.6	41.4	37.1	35	46.3	36.7	42	46.2	48.7
Fat Percentage (%)															Fat Percentage (%) Analysis
	Male															Male	Avg	STD	SEM	P value
	WT	CDH5_4924	CDH5_4925	CDH5_4939	CDH5_5069	CDH5_5070	CDH5_5079									WT	50.5414	3.43383	1.40186	0.602441
		55.0562	47.2549	46.2385	50.5843	53.5836	50.5311									KO	49.3705	4.29101	1.62185
																Female	Avg	STD	SEM	P value
	KO	CDH5_4930	CDH5_4931	CDH5_4937	CDH5_4940	CDH5_5067	CDH5_5068	CDH5_5080								WT	58.1461	4.59018	1.73492	0.00493649
		51.7037	52.1515	55.0562	44.708	51.8409	44.864	45.269								KO	64.1155	3.63036	1.00688
	Female
	WT	CDH5_4928	CDH5_4929	CDH5_4932	CDH5_4936	CDH5_5140	CDH5_5141	CDH5_5071
		60.7266	57.4312	58.5895	57.037	55.7656	51.2712	66.2016
	KO	CDH5_5139	CDH5_5084	CDH5_4926	CDH5_4933	CDH5_4934	CDH5_4935	CDH5_4941	CDH5_4942	CDH5_4943	CDH5_4944	CDH5_4982	CDH5_4983	CDH5_4984
		62.4601	57.8154	57.0881	66.4452	62.1488	63.3997	65.3169	64.2202	67.3945	64.0489	66.2461	67.4453	69.4722
Total Lean Mass (g)															Total Lean Mass (g) Analysis
	Male															Male	Avg	STD	SEM	P value
	WT	CDH5_4924	CDH5_4925	CDH5_4939	CDH5_5069	CDH5_5070	CDH5_5079									WT	23.5	1.53883	0.628225	0.216394
		23.1	21.6	23.4	24.4	22.5	26									KO	25.0286	2.46422	0.931388
																Female	Avg	STD	SEM	P value
	KO	CDH5_4930	CDH5_4931	CDH5_4937	CDH5_4940	CDH5_5067	CDH5_5068	CDH5_5080								WT	18.9571	0.475595	0.179758	0.68006
		26.3	22.6	23.5	24.3	27	29	22.5								KO	18.7769	1.07172	0.297242
	Female
	WT	CDH5_4928	CDH5_4929	CDH5_4932	CDH5_4936	CDH5_5140	CDH5_5141	CDH5_5071
		19.2	19.2	19.2	19.2	19	17.9	19
	KO	CDH5_5139	CDH5_5084	CDH5_4926	CDH5_4933	CDH5_4934	CDH5_4935	CDH5_4941	CDH5_4942	CDH5_4943	CDH5_4944	CDH5_4982	CDH5_4983	CDH5_4984
		19.7	18.4	18.6	18.3	19.2	20.7	17.1	16.9	19.4	18	18.7	19.8	19.3
Lean Percentage (%)															Lean Percentage (%) Analysis
	Male															Male	Avg	STD	SEM	P value
	WT	CDH5_4924	CDH5_4925	CDH5_4939	CDH5_5069	CDH5_5070	CDH5_5079									WT	40.1586	2.27813	0.930042	0.673335
		37.0787	42.3529	42.9358	40.7346	38.3959	39.4537									KO	40.7486	2.58234	0.976034
																Female	Avg	STD	SEM	P value
	KO	CDH5_4930	CDH5_4931	CDH5_4937	CDH5_4940	CDH5_5067	CDH5_5068	CDH5_5080								WT	34.5744	2.6601	1.00542	0.00508825
		38.963	38.8985	37.7207	44.3431	39.7644	43.8066	41.744								KO	30.9452	2.3029	0.638709
	Female
	WT	CDH5_4928	CDH5_4929	CDH5_4932	CDH5_4936	CDH5_5140	CDH5_5141	CDH5_5071
		33.218	35.2294	34.7197	35.5556	35.9168	37.9237	29.4574
	KO	CDH5_5139	CDH5_5084	CDH5_4926	CDH5_4933	CDH5_4934	CDH5_4935	CDH5_4941	CDH5_4942	CDH5_4943	CDH5_4944	CDH5_4982	CDH5_4983	CDH5_4984
		31.4696	34.6516	35.6322	30.3987	31.7355	31.6998	30.1056	31.0092	28.2387	31.4136	29.4953	28.9051	27.5321
Body Weight (g)															Body Weight (g) Analysis
	Male															Male	Avg	STD	SEM	P value
	WT	CDH5_4924	CDH5_4925	CDH5_4939	CDH5_5069	CDH5_5070	CDH5_5079									WT	58.7	5.35126	2.18464	0.391306
		62.3	51	54.5	59.9	58.6	65.9									KO	61.5286	5.97068	2.25671
																Female	Avg	STD	SEM	P value
	KO	CDH5_4930	CDH5_4931	CDH5_4937	CDH5_4940	CDH5_5067	CDH5_5068	CDH5_5080								WT	55.1714	5.23568	1.9789	0.0452153
		67.5	58.1	62.3	54.8	67.9	66.2	53.9								KO	61.0154	6.0517	1.67844
	Female	CDH5_4924	CDH5_4925	CDH5_4939	CDH5_5069	CDH5_5070	CDH5_5079	CDH5_5071
	WT	57.8	54.5	55.3	54	52.9	47.2	64.5
	KO	CDH5_5139	CDH5_5084	CDH5_4926	CDH5_4933	CDH5_4934	CDH5_4935	CDH5_4941	CDH5_4942	CDH5_4943	CDH5_4944	CDH5_4982	CDH5_4983	CDH5_4984
		62.6	53.1	52.2	60.2	60.5	65.3	56.8	54.5	68.7	57.3	63.4	68.5	70.1
