# Supplementary material for: The SWELL1-LRRC8 complex regulates endothelial AKT-eNOS signaling and vascular function
Source: eLife. 2021 Feb 25;10:e61313. doi: 10.7554/eLife.61313 (PMC7997661; doi:10.7554/eLife.61313)
Supplement: Figure 8—source data 1. [file elife-61313-fig8-data1.xlsx]

## Sheet: Sheet1
Time (s)	WT			eSWELL1 KO
0	5.9	15.9	7.1	7.4	10.5	9.8
60	11.4	17.9	11	8.4	11.9	9.9
120	15.5	20.1	11.7	8.2	12.5	10.4
180	18.2	21	12	8.6	13.4	10.9
240	26.9	23.3	12.4	9.4	14.8	11.5
300	32.2	24.7	12.7	9.3	15.4	16.5
360	39	26.5	13	12.4	15.6	23.2
420	42.6	27	21.8	14.9	17.1	23.4
480	44.7	28.4	23	18.1	17.6	24.7
540	49.5	29.2	24.2	25.8	18.5	25.6
600	54.3	30	25.7	27.4	20.7	31.5
