# Supplementary material for: The SWELL1-LRRC8 complex regulates endothelial AKT-eNOS signaling and vascular function
Source: eLife. 2021 Feb 25;10:e61313. doi: 10.7554/eLife.61313 (PMC7997661; doi:10.7554/eLife.61313)
Supplement: Figure 8—source data 2. [file elife-61313-fig8-data2.xlsx]

## Sheet: Sheet1
Time (s)	eSWELL1 WT			eSWELL1 KO
0	7.5	13.3	12	6.8	5	9.5
60	8.1	14.1	12.7	7.8	5.6	10.1
120	12.1	20.9	13.9	10	5.9	10.6
180	13.3	22.4	15.7	11.8	6.2	11.1
240	17.5	28.1	23.3	12.6	6.7	10.7
300	19.1	30	24.5	12.9	7.3	11
360	28.5	32.1	29.5	16.2	7.5	11.1
420	29.3	33.6	29.3	15.4	9.8	11.1
480	27.9	46	33.9	20.9	10.1	11.4
540	31.9	48	38.2	34.8	9.6	11.9
600	31.2	52.2	48.1	38.1	11.2	11.9
660	44.2	53.8	49.9	41.1	11.1	11.9
720	40.7	54.7	50.5	39.5	12.6	12.2
780	43.4	58.2	55.7	47.5	12.8	11.8
840	47.5	58.7	59.4	49.9	13.4	16
900	44.5	61.8	60.4	48.5	13.5	16.2
960	52.9	73.4	64.2	52.1	13.8	16.4
