# Supplementary material for: The SWELL1-LRRC8 complex regulates endothelial AKT-eNOS signaling and vascular function
Source: eLife. 2021 Feb 25;10:e61313. doi: 10.7554/eLife.61313 (PMC7997661; doi:10.7554/eLife.61313)
Supplement: Figure 8—source data 3. [file elife-61313-fig8-data3.xlsx]

## Sheet: Sheet1
	eSWELL1 WT			eSWELL1 KO
Male	16.48	13.65	32.86	13.64	10.61	13.78
Female	42.99	62.09	40.09	28.6	9.69	9.28
