# Supplementary material for: The SWELL1-LRRC8 complex regulates endothelial AKT-eNOS signaling and vascular function
Source: eLife. 2021 Feb 25;10:e61313. doi: 10.7554/eLife.61313 (PMC7997661; doi:10.7554/eLife.61313)
Supplement: Figure 8—source data 4. [file elife-61313-fig8-data4.xlsx]

## Sheet: Sheet1
	WT			KO
Male	23	25	29	20	19	18
Female	32	30	33	26	13	12
