# Supplementary material for: The SWELL1-LRRC8 complex regulates endothelial AKT-eNOS signaling and vascular function
Source: eLife. 2021 Feb 25;10:e61313. doi: 10.7554/eLife.61313 (PMC7997661; doi:10.7554/eLife.61313)
Supplement: Figure 8—source data 5. [file elife-61313-fig8-data5.xlsx]

## Sheet: Sheet1
	WT																													KO
Male	0.046	0.02	0.038	0.023	0.032	0.047	0.029	0.032	0.035	0.032	0.04	0.048	0.044	0.052	0.037	0.047	0.065	0.062	0.083	0.063	0.069	0.028	0.035	0.064	0.043	0.046	0.039			0.033	0.048	0.043	0.044	0.037	0.048	0.031	0.015	0.023	0.03	0.031	0.026	0.009	0.027	0.027	0.046	0.023	0.022	0.021	0.013
Female	0.048	0.067	0.035	0.061	0.035	0.047	0.058	0.045	0.058	0.047	0.048	0.064	0.052	0.075	0.068	0.037	0.036	0.049	0.139	0.064	0.047	0.046	0.031	0.051	0.055	0.047	0.061			0.034	0.032	0.026	0.026	0.019	0.022	0.027	0.01	0.023	0.017	0.022	0.049	0.03	0.024	0.035	0.032	0.03	0.046	0.03	0.023
[truncated: 9 more columns]
