# Supplementary material for: The SWELL1-LRRC8 complex regulates endothelial AKT-eNOS signaling and vascular function
Source: eLife. 2021 Feb 25;10:e61313. doi: 10.7554/eLife.61313 (PMC7997661; doi:10.7554/eLife.61313)
Supplement: Figure 8—source data 6. [file elife-61313-fig8-data6.xlsx]

## Sheet: Sheet1
	WT																														eSWELL1 KO
Male	14	21	17	18	19	12	17	17	19	17	30	14	17	19	21	30	38	24	21	27	19	20	17	33	32	29	21	41	33	26	26	19	34	38	37	34	34	29	31	24	23	19	20	18	33	30	37	33	20
Female	30	31	31	31	33	33	31	22	24	32	23	27	38	21	53	39	45	47	46	35	17	25	37	38	27	43	35	19	24	45	19	21	18	20	24	18	15	7	14	12	14	14	21	15	20	27	22	28	21
[truncated: 11 more columns]
