# Supplementary material for: The SWELL1-LRRC8 complex regulates endothelial AKT-eNOS signaling and vascular function
Source: eLife. 2021 Feb 25;10:e61313. doi: 10.7554/eLife.61313 (PMC7997661; doi:10.7554/eLife.61313)
Supplement: Figure 8—source data 7. [file elife-61313-fig8-data7.xlsx]

## Sheet: Sheet1
	WT			KO
Male	0.316704	0.400032	0.420248	0.391464	0.333068	0.361992
Female	0.546656	0.714832	0.448008	0.415972	0.30922	0.317608
