# Supplementary material for: The SWELL1-LRRC8 complex regulates endothelial AKT-eNOS signaling and vascular function
Source: eLife. 2021 Feb 25;10:e61313. doi: 10.7554/eLife.61313 (PMC7997661; doi:10.7554/eLife.61313)
Supplement: Figure 8—source data 8. [file elife-61313-fig8-data8.xlsx]

## Sheet: Sheet1
	WT			KO
Male	10.4584	13.7	12.0655	12.3348	10.1529	10.351
Female	15.8638	20.9983	13.5618	12.8763	9.60929	9.00883
