# Supplementary material for: The SWELL1-LRRC8 complex regulates endothelial AKT-eNOS signaling and vascular function
Source: eLife. 2021 Feb 25;10:e61313. doi: 10.7554/eLife.61313 (PMC7997661; doi:10.7554/eLife.61313)
Supplement: Figure 8—source data 9. [file elife-61313-fig8-data9.xlsx]

## Sheet: Sheet1
	WT			KO
Male	0.642307	0.484676	0.489747	0.514559	0.645558	0.58527
Female	0.334276	0.214147	0.437145	0.461244	0.645353	0.657033
