# Supplementary material for: The SWELL1-LRRC8 complex regulates endothelial AKT-eNOS signaling and vascular function
Source: eLife. 2021 Feb 25;10:e61313. doi: 10.7554/eLife.61313 (PMC7997661; doi:10.7554/eLife.61313)
Supplement: Figure 8—source data 10. [file elife-61313-fig8-data10.xlsx]

## Sheet: Sheet1
	WT			KO
Male	21	12	36	19	18
Female	36	55	43	23	17
