# Supplementary material for: The SWELL1-LRRC8 complex regulates endothelial AKT-eNOS signaling and vascular function
Source: eLife. 2021 Feb 25;10:e61313. doi: 10.7554/eLife.61313 (PMC7997661; doi:10.7554/eLife.61313)
Supplement: Figure 8—source data 11. [file elife-61313-fig8-data11.xlsx]

## Sheet: Sheet1
	WT			KO
Male	9	14	24	25	13	16
Female	34	70	34	17	11	12
