# Supplementary material for: The SWELL1-LRRC8 complex regulates endothelial AKT-eNOS signaling and vascular function
Source: eLife. 2021 Feb 25;10:e61313. doi: 10.7554/eLife.61313 (PMC7997661; doi:10.7554/eLife.61313)
Supplement: Supplementary file 1. [file elife-61313-supp1.xlsx]

## Sheet: SC_vs_LL.gene_exp.diff
Supplementary Table 1: RNA sequencing data
test_id	gene_id	gene	locus	status	shSCR	shSWELL1	log2(fold_change)	test_stat	p_value	q_value	significant		Fold change shSWELL1 vs shSCR
A1BG	A1BG	A1BG	chr19:58858171-58874214	OK	0.605374	0.747875	0.304972	0.514512	0.36705	0.546593	no		1.23539
A1BG-AS1	A1BG-AS1	A1BG-AS1	chr19:58858171-58874214	OK	0.895598	1.04504	0.222638	0.473708	0.4034	0.579599	no		1.16687
A1CF	A1CF	A1CF	chr10:52559168-52645435	NOTEST	0	0.0024869	inf	0	1	1	no		#VALUE!
A2M	A2M	A2M	chr12:9217772-9268558	NOTEST	0.0276543	0.0118904	-1.21771	0	1	1	no		0.429965
A2M-AS1	A2M-AS1	A2M-AS1	chr12:9217772-9268558	NOTEST	0.0782683	0.00920964	-3.08721	0	1	1	no		0.117668
A2ML1	A2ML1	A2ML1	chr12:8975149-9029381	NOTEST	0	0	0	0	1	1	no		1
A2MP1	A2MP1	A2MP1	chr12:9381128-9386803	NOTEST	0	0	0	0	1	1	no		1
A3GALT2	A3GALT2	A3GALT2	chr1:33772366-33786699	NOTEST	0	0	0	0	1	1	no		1
A4GALT	A4GALT	A4GALT	chr22:43088126-43116876	OK	9.49363	8.7513	-0.117464	-0.766068	0.18105	0.336953	no		0.921807
A4GNT	A4GNT	A4GNT	chr3:137842559-137851229	NOTEST	0.156027	0.191106	0.292574	0	1	1	no		1.22482
AA06	AA06	AA06	chr17:31340105-32483825	NOTEST	0	0	0	0	1	1	no		1
AAAS	AAAS	AAAS	chr12:53701239-53715412	OK	33.8396	33.2292	-0.0262605	-0.218346	0.70085	0.824674	no		0.981962
AACS	AACS	AACS	chr12:125549924-125627871	OK	10.4197	11.2093	0.105371	0.805165	0.157	0.304275	no		1.07577
AACSP1	AACSP1	AACSP1	chr5:178191863-178203277	NOTEST	0	0	0	0	1	1	no		1
AADAC	AADAC	AADAC	chr3:151347319-151645963	OK	23.8078	20.0983	-0.244361	-1.36623	0.01655	0.0542538	no		0.84419
AADACL2	AADACL2	AADACL2	chr3:151347319-151645963	NOTEST	0	0	0	0	1	1	no		1
AADACL2-AS1	AADACL2-AS1	AADACL2-AS1	chr3:151347319-151645963	NOTEST	0	0	0	0	1	1	no		1
AADACL3	AADACL3	AADACL3	chr1:12776117-12788726	NOTEST	0	0	0	0	1	1	no		1
AADACL4	AADACL4	AADACL4	chr1:12704565-12727097	NOTEST	0	0	0	0	1	1	no		1
AADACP1	AADACP1	AADACP1	chr3:151347319-151645963	OK	26.5141	19.4885	-0.44414	-2.19263	0.0002	0.00128915	yes		0.735022
AADAT	AADAT	AADAT	chr4:170981372-171011538	OK	1.0178	0.835185	-0.285281	-0.670433	0.1721	0.324674	no		0.820582
AAED1	AAED1	AAED1	chr9:99403532-99417599	OK	10.3437	9.80562	-0.0770735	-0.430527	0.44885	0.621258	no		0.947979
AAGAB	AAGAB	AAGAB	chr15:67493012-67819641	OK	27.3442	23.7204	-0.205102	-1.64667	0.0043	0.0180197	yes		0.867477
AAK1	AAK1	AAK1	chr2:69685126-69870977	OK	2.50897	2.53999	0.0177236	0.146065	0.796	0.887931	no		1.01236
AAMDC	AAMDC	AAMDC	chr11:77532207-77583398	OK	42.1431	37.7225	-0.15987	-0.956076	0.0907	0.202514	no		0.895106
AAMP	AAMP	AAMP	chr2:219128851-219134932	OK	41.8352	44.5521	0.0907758	0.773884	0.1739	0.327423	no		1.06494
AANAT	AANAT	AANAT	chr17:74449432-74466199	NOTEST	0.0201611	0.0396231	0.974765	0	1	1	no		1.96532
AAR2	AAR2	AAR2	chr20:34824338-34844863	OK	33.4911	27.1542	-0.302605	-2.58467	5e-05	0.000373901	yes		0.810787
AARD	AARD	AARD	chr8:117950463-117956239	NOTEST	0.0107659	0	#NAME?	0	1	1	no		#NAME?
AARS	AARS	AARS	chr16:70286296-70323412	OK	79.5116	90.0125	0.17896	1.25297	0.0314	0.0901154	no		1.13207
AARS2	AARS2	AARS2	chr6:44266462-44281063	OK	2.72985	2.57911	-0.0819497	-0.481116	0.39495	0.571424	no		0.94478
AARSD1	AARSD1	AARSD1	chr17:41102542-41132545	OK	14.5798	14.7359	0.0153709	0.0993884	0.8648	0.928141	no		1.01071
AASDH	AASDH	AASDH	chr4:57204450-57253674	OK	3.58068	3.81632	0.0919505	0.517327	0.358	0.538996	no		1.06581
AASDHPPT	AASDHPPT	AASDHPPT	chr11:105921824-105969419	OK	33.789	36.8987	0.127016	0.885368	0.12425	0.257107	no		1.09203
AASS	AASS	AASS	chr7:121713597-121784344	OK	3.12681	3.25846	0.0595029	0.39257	0.4986	0.666427	no		1.04211
AATBC	AATBC	AATBC	chr21:45225638-45232448	NOTEST	0.11178	0.122079	0.127156	0	1	1	no		1.09214
AATF	AATF	AATF	chr17:35306174-35414171	OK	43.08	39.4914	-0.12548	-1.08807	0.05475	0.138418	no		0.916699
AATK	AATK	AATK	chr17:79008946-79156964	NOTEST	0.481069	0.298462	-0.688694	0	1	1	no		0.620415
AATK-AS1	AATK-AS1	AATK-AS1	chr17:79008946-79156964	NOTEST	0	0	0	0	1	1	no		1
ABALON	ABALON	ABALON	chr20:30252260-30311212	OK	90.7665	100.071	0.140799	0.546605	0.33935	0.521796	no		1.10252
ABAT	ABAT	ABAT	chr16:8768443-8878432	NOTEST	0.034922	0.0164086	-1.08968	0	1	1	no		0.469866
ABCA1	ABCA1	ABCA1	chr9:107543283-107690527	OK	6.73675	6.48561	-0.0548121	-0.466418	0.41535	0.590965	no		0.96272
ABCA10	ABCA10	ABCA10	chr17:67144147-67323323	NOTEST	0.198961	0.10668	-0.899194	0	1	1	no		0.536186
ABCA11P	ABCA11P	ABCA11P	chr4:419223-492960	OK	2.9173	2.62123	-0.154388	-0.448301	0.4378	0.611551	no		0.898513
ABCA12	ABCA12	ABCA12	chr2:215674952-216003151	NOTEST	0.0310279	0.0918795	1.56618	0	1	1	no		2.9612
ABCA13	ABCA13	ABCA13	chr7:48211056-48687091	NOTEST	0.0486443	0.0357227	-0.445429	0	1	1	no		0.734366
ABCA17P	ABCA17P	ABCA17P	chr16:2390922-2476700	NOTEST	0	0	0	0	1	1	no		1
ABCA2	ABCA2	ABCA2	chr9:139901685-139931234	OK	30.6927	30.3838	-0.0145935	-0.101974	0.8555	0.922865	no		0.989936
ABCA3	ABCA3	ABCA3	chr16:2325878-2390747	OK	8.67436	5.8341	-0.572246	-4.59092	5e-05	0.000373901	yes		0.672569
ABCA4	ABCA4	ABCA4	chr1:94458393-94586705	NOTEST	0.334438	0.408057	0.287032	0	1	1	no		1.22013
ABCA5	ABCA5	ABCA5	chr17:67144147-67323323	OK	1.01337	1.42761	0.494445	2.4518	5e-05	0.000373901	yes		1.40878
ABCA6	ABCA6	ABCA6	chr17:67074846-67138015	OK	1.54648	1.89448	0.292814	1.52954	0.0072	0.0274582	yes		1.22503
ABCA7	ABCA7	ABCA7	chr19:1040101-1065570	OK	3.1375	3.54744	0.177162	1.23029	0.0317	0.0908085	no		1.13066
ABCA8	ABCA8	ABCA8	chr17:66863427-66951533	OK	3.21631	3.55171	0.143109	0.957524	0.09295	0.206388	no		1.10428
ABCA9	ABCA9	ABCA9	chr17:66970772-67057136	NOTEST	0.135465	0.188407	0.475935	0	1	1	no		1.39082
ABCA9-AS1	ABCA9-AS1	ABCA9-AS1	chr17:66970772-67057136	NOTEST	0	0	0	0	1	1	no		1
ABCB1	ABCB1	ABCB1	chr7:87133178-87461613	OK	8.76383	7.85374	-0.158182	-1.13403	0.04875	0.126705	no		0.896154
ABCB10	ABCB10	ABCB10	chr1:229652328-229694442	OK	6.93966	6.49295	-0.0959909	-0.684653	0.23525	0.405107	no		0.935629
ABCB11	ABCB11	ABCB11	chr2:169779448-169887833	OK	0.625703	0.756686	0.274217	0.949475	0.09905	0.21664	no		1.20934
ABCB4	ABCB4	ABCB4	chr7:87031360-87105019	NOTEST	0.224664	0.210965	-0.090769	0	1	1	no		0.939022
ABCB5	ABCB5	ABCB5	chr7:20655244-20796637	NOTEST	0.00412036	0	#NAME?	0	1	1	no		#NAME?
ABCB6	ABCB6	ABCB6	chr2:220074487-220083712	OK	10.5617	14.2633	0.433474	3.32099	5e-05	0.000373901	yes		1.35048
ABCB7	ABCB7	ABCB7	chrX:74273006-74376175	OK	7.74944	6.94218	-0.158704	-1.02593	0.07205	0.170496	no		0.895829
ABCB8	ABCB8	ABCB8	chr7:150725508-150744869	OK	12.1514	12.2544	0.0121821	0.101372	0.85965	0.925012	no		1.00848
ABCB9	ABCB9	ABCB9	chr12:123405497-123451056	OK	5.08617	5.09733	0.0031635	0.0200036	0.9737	0.986326	no		1.0022
ABCC1	ABCC1	ABCC1	chr16:16043433-16236930	OK	114.42	97.4832	-0.231116	-1.63564	0.00445	0.0185171	yes		0.851976
ABCC1	ABCC10	ABCC10	chr6:43395291-43424370	OK	6.05732	5.44747	-0.153093	-1.11797	0.0527	0.134606	no		0.89932
ABCC11	ABCC11	ABCC11	chr16:48200821-48269088	NOTEST	0.0572102	0.0339265	-0.75386	0	1	1	no		0.593015
ABCC12	ABCC12	ABCC12	chr16:48116883-48180681	NOTEST	0.0565291	0.0296231	-0.932274	0	1	1	no		0.524032
ABCC13	ABCC13	ABCC13	chr21:15646119-15673692	NOTEST	0	0	0	0	1	1	no		1
ABCC2	ABCC2	ABCC2	chr10:101542354-101611949	OK	3.62363	5.9941	0.726109	5.13314	5e-05	0.000373901	yes		1.65417
ABCC3	ABCC3	ABCC3	chr17:48712217-48769063	OK	5.13492	7.14915	0.477432	3.0789	5e-05	0.000373901	yes		1.39226
ABCC4	ABCC4	ABCC4	chr13:95672082-95953700	OK	6.90536	6.37908	-0.11437	-0.872728	0.12675	0.260699	no		0.923786
ABCC5	ABCC5	ABCC5	chr3:183637723-183735727	OK	17.4368	18.5354	0.0881432	0.614682	0.2872	0.464191	no		1.063
ABCC5-AS1	ABCC5-AS1	ABCC5-AS1	chr3:183637723-183735727	NOTEST	0	0	0	0	1	1	no		1
ABCC6	ABCC6	ABCC6	chr16:16243421-16317328	NOTEST	0.164058	0.204181	0.315641	0	1	1	no		1.24456
ABCC6P1	ABCC6P1	ABCC6P1	chr16:18582569-18609607	NOTEST	0	0	0	0	1	1	no		1
ABCC6P2	ABCC6P2	ABCC6P2	chr16:14916288-14918559	NOTEST	0	0	0	0	1	1	no		1
ABCC8	ABCC8	ABCC8	chr11:17414431-17498392	NOTEST	0.0111241	0.0144117	0.373547	0	1	1	no		1.29553
ABCC9	ABCC9	ABCC9	chr12:21950323-22089628	NOTEST	0.147602	0.0970359	-0.605124	0	1	1	no		0.657415
ABCD1	ABCD1	ABCD1	chrX:152990322-153010216	OK	3.26047	2.93734	-0.150569	-0.848162	0.1326	0.269518	no		0.900895
ABCD2	ABCD2	ABCD2	chr12:39945021-40013843	OK	0.530738	0.791336	0.576292	2.04015	0.00095	0.00501059	yes		1.49101
ABCD3	ABCD3	ABCD3	chr1:94883932-94984219	OK	14.2749	13.1572	-0.117631	-0.752174	0.186	0.343642	no		0.9217
ABCD4	ABCD4	ABCD4	chr14:74751979-74769767	OK	7.14135	8.10643	0.182871	1.27403	0.02655	0.0789697	no		1.13514
ABCE1	ABCE1	ABCE1	chr4:145915726-146050676	OK	32.1673	33.5537	0.0608758	0.404765	0.47825	0.648155	no		1.0431
ABCF1	ABCF1	ABCF1	chr6_ssto_hap7:1871447-1891586	OK	27.6601	26.3611	-0.0693931	-0.572884	0.3184	0.498971	no		0.953039
ABCF2	ABCF2	ABCF2	chr7:150904922-150924460	OK	48.8888	50.3047	0.041188	0.266448	0.6402	0.779218	no		1.02896
ABCF3	ABCF3	ABCF3	chr3:183903862-183911795	OK	22.1146	21.947	-0.0109751	-0.0903586	0.88025	0.935534	no		0.992422
ABCG1	ABCG1	ABCG1	chr21:43619798-43717354	OK	2.97441	2.1884	-0.442729	-2.06403	0.00015	0.00100331	yes		0.735742
ABCG2	ABCG2	ABCG2	chr4:89011415-89152474	OK	3.17972	3.29252	0.050293	0.305738	0.5962	0.746274	no		1.03548
ABCG4	ABCG4	ABCG4	chr11:119019749-119033374	NOTEST	0.0609859	0.0468738	-0.379692	0	1	1	no		0.768602
ABCG5	ABCG5	ABCG5	chr2:44039610-44065958	NOTEST	0.00675285	0	#NAME?	0	1	1	no		#NAME?
ABCG8	ABCG8	ABCG8	chr2:44066102-44105605	NOTEST	0	0	0	0	1	1	no		1
ABHD1	ABHD1	ABHD1	chr2:27346656-27357542	NOTEST	0	0	0	0	1	1	no		1
ABHD10	ABHD10	ABHD10	chr3:111697722-111712215	OK	11.2199	10.3239	-0.120067	-0.87789	0.1227	0.254774	no		0.920145
ABHD11	ABHD11	ABHD11	chr7:73150424-73153197	OK	11.82	10.8463	-0.124022	-0.763747	0.18445	0.341642	no		0.917626
ABHD11-AS1	ABHD11-AS1	ABHD11-AS1	chr7:73149398-73150330	OK	2.76621	1.71113	-0.692958	-1.12663	0.05725	0.143425	no		0.618584
ABHD12	ABHD12	ABHD12	chr20:25228705-25371618	OK	96.2324	121.061	0.331139	0.821992	0.1519	0.296947	no		1.25801
ABHD12B	ABHD12B	ABHD12B	chr14:51338877-51371688	NOTEST	0	0.0466416	inf	0	1	1	no		#VALUE!
ABHD13	ABHD13	ABHD13	chr13:108870762-108886603	OK	3.64952	3.8095	0.0618945	0.414199	0.4713	0.641745	no		1.04384
ABHD14A	ABHD14A	ABHD14A	chr3:52009041-52023218	OK	8.55255	8.87561	0.0534913	0.189305	0.7424	0.852566	no		1.03777
ABHD14A-ACY1	ABHD14A-ACY1	ABHD14A-ACY1	chr3:52009041-52023218	OK	0.00157786	0.631001	8.64353	0.294911	0.18165	0.337917	no		399.91
ABHD14B	ABHD14B	ABHD14B	chr3:52002525-52008646	OK	18.2269	17.294	-0.0757999	-0.582592	0.3112	0.49147	no		0.948816
ABHD15	ABHD15	ABHD15	chr17:27887688-27894042	OK	5.40763	5.45409	0.0123421	0.0803842	0.88865	0.94124	no		1.00859
ABHD16A	ABHD16A	ABHD16A	chr6_ssto_hap7:2985531-3001955	OK	10.8039	12.6523	0.22785	1.57256	0.0066	0.0256906	yes		1.17109
ABHD16B	ABHD16B	ABHD16B	chr20:62492565-62494341	OK	3.73789	3.55839	-0.0710005	-0.318841	0.5828	0.736041	no		0.951978
ABHD17A	ABHD17A	ABHD17A	chr19:1876974-1885518	OK	31.2831	33.9013	0.115959	0.929809	0.10405	0.22464	no		1.0837
ABHD17B	ABHD17B	ABHD17B	chr9:74477367-74526148	OK	2.96771	3.90453	0.395801	1.92844	0.00075	0.00407691	yes		1.31567
ABHD17C	ABHD17C	ABHD17C	chr15:80987651-81047962	OK	4.74622	2.83831	-0.741745	-3.7127	5e-05	0.000373901	yes		0.598016
ABHD2	ABHD2	ABHD2	chr15:89631380-89745591	OK	24.594	21.6743	-0.182321	-1.27027	0.02705	0.0800543	no		0.881284
ABHD3	ABHD3	ABHD3	chr18:19230857-19284766	OK	3.6797	2.4479	-0.588041	-2.52056	0.0001	0.000697417	yes		0.665246
ABHD4	ABHD4	ABHD4	chr14:23067146-23081265	OK	32.2236	32.8339	0.0270686	0.232889	0.68235	0.810739	no		1.01894
ABHD5	ABHD5	ABHD5	chr3:43732374-43764217	OK	6.994	5.80433	-0.268987	-2.04043	0.00025	0.00156594	yes		0.829902
ABHD6	ABHD6	ABHD6	chr3:58223258-58280461	OK	5.32609	5.08175	-0.0677504	-0.39039	0.4968	0.664799	no		0.954125
ABHD8	ABHD8	ABHD8	chr19:17402939-17414282	OK	1.55133	1.32882	-0.223356	-0.726775	0.20925	0.372239	no		0.856571
ABI1	ABI1	ABI1	chr10:26986594-27150016	OK	17.0232	15.8294	-0.1049	-0.836354	0.14125	0.282295	no		0.929869
ABI2	ABI2	ABI2	chr2:204192961-204296896	OK	13.4995	12.7368	-0.0839007	-0.731658	0.20055	0.360862	no		0.943503
ABI3	ABI3	ABI3	chr17:47283595-47300587	OK	15.1605	10.9773	-0.465803	-2.91692	5e-05	0.000373901	yes		0.724068
ABI3BP	ABI3BP	ABI3BP	chr3:100468178-100712334	OK	104.712	125.699	0.263549	1.861	0.0009	0.00478344	yes		1.20043
ABL1	ABL1	ABL1	chr9:133589267-133763062	OK	32.4125	33.3056	0.0392136	0.271899	0.63275	0.7744	no		1.02755
ABL2	ABL2	ABL2	chr1:179068461-179198819	OK	6.12071	5.35664	-0.192371	-1.50238	0.01095	0.0386942	yes		0.875166
ABLIM1	ABLIM1	ABLIM1	chr10:116190868-116444414	OK	6.98979	7.57712	0.1164	0.953796	0.0998	0.217667	no		1.08403
ABLIM2	ABLIM2	ABLIM2	chr4:7967036-8160559	NOTEST	0.0678489	0.0413021	-0.716111	0	1	1	no		0.608736
ABLIM3	ABLIM3	ABLIM3	chr5:148521045-148640001	OK	232.214	262.725	0.1781	1.24335	0.031	0.089339	no		1.13139
ABO	ABO	ABO	chr9:136130562-136150630	NOTEST	0	0	0	0	1	1	no		1
ABR	ABR	ABR	chr17:906757-1090616	OK	67.2307	65.8487	-0.0299658	-0.209567	0.71955	0.836534	no		0.979444
ABRA	ABRA	ABRA	chr8:107771710-107782472	NOTEST	0.00717661	0	#NAME?	0	1	1	no		#NAME?
ABRACL	ABRACL	ABRACL	chr6:139349818-139364439	OK	40.0639	43.2416	0.110117	0.805261	0.1637	0.313011	no		1.07932
ABT1	ABT1	ABT1	chr6:26597170-26600277	OK	7.22104	6.92511	-0.0603687	-0.375432	0.5129	0.678959	no		0.959019
ABTB1	ABTB1	ABTB1	chr3:127391780-127399769	OK	2.86184	2.63463	-0.119344	-0.491572	0.38365	0.561948	no		0.920606
ABTB2	ABTB2	ABTB2	chr11:34172533-34379555	OK	14.0711	14.3368	0.0269866	0.229178	0.69205	0.81765	no		1.01888
ACAA1	ACAA1	ACAA1	chr3:38080695-38178733	OK	40.2413	39.2374	-0.0364473	-0.310025	0.58735	0.739156	no		0.975053
ACAA2	ACAA2	ACAA2	chr18:47309873-47340251	OK	30.44	30.9769	0.0252267	0.208291	0.71845	0.835803	no		1.01764
ACACA	ACACA	ACACA	chr17:35441926-35766902	OK	17.5744	22.4614	0.353973	2.46598	5e-05	0.000373901	yes		1.27808
ACACB	ACACB	ACACB	chr12:109577201-109706030	OK	1.00264	1.1209	0.160859	0.870312	0.1243	0.257107	no		1.11795
ACAD10	ACAD10	ACAD10	chr12:112123856-112194911	OK	9.41638	8.79334	-0.0987621	-0.759935	0.1868	0.344454	no		0.933834
ACAD11	ACAD11	ACAD11	chr3:132276981-132593050	OK	9.21748	9.49546	0.0428662	0.149485	0.7949	0.887501	no		1.03016
ACAD8	ACAD8	ACAD8	chr11:134123433-134135746	OK	12.5106	12.024	-0.0572341	-0.408737	0.47625	0.646574	no		0.961105
ACAD9	ACAD9	ACAD9	chr3:128598332-128631957	OK	21.0529	17.064	-0.303064	-2.42351	5e-05	0.000373901	yes		0.810529
ACADL	ACADL	ACADL	chr2:211052715-211090215	NOTEST	0	0	0	0	1	1	no		1
ACADM	ACADM	ACADM	chr1:76190031-76229363	OK	14.7928	13.1519	-0.169624	-1.25955	0.02695	0.0797964	no		0.889074
ACADS	ACADS	ACADS	chr12:121163540-121177811	OK	2.47701	2.59099	0.0649042	0.259528	0.6543	0.788576	no		1.04602
ACADSB	ACADSB	ACADSB	chr10:124768428-124817806	OK	4.22919	3.31822	-0.349971	-2.41196	5e-05	0.000373901	yes		0.7846
ACADVL	ACADVL	ACADVL	chr17:7093209-7128586	OK	121.203	141.9	0.227456	1.45981	0.0113	0.0396266	yes		1.17077
ACAN	ACAN	ACAN	chr15:89346673-89418585	NOTEST	0	0	0	0	1	1	no		1
ACAP1	ACAP1	ACAP1	chr17:7239847-7254793	NOTEST	0.0439299	0.0810597	0.883781	0	1	1	no		1.8452
ACAP2	ACAP2	ACAP2	chr3:194995464-195163817	OK	10.3695	10.4102	0.00565516	0.0484815	0.93215	0.964044	no		1.00393
ACAP3	ACAP3	ACAP3	chr1:1227763-1243269	OK	9.31419	11.6489	0.32269	2.50703	5e-05	0.000373901	yes		1.25066
ACAT1	ACAT1	ACAT1	chr11:107992257-108018891	OK	43.1564	30.7115	-0.490795	-4.19234	5e-05	0.000373901	yes		0.711633
ACAT2	ACAT2	ACAT2	chr6:160181290-160210735	OK	17.5418	22.6251	0.367129	0.814912	0.1576	0.305057	no		1.28978
ACBD3	ACBD3	ACBD3	chr1:226332379-226374423	OK	15.6764	15.4558	-0.0204451	-0.168328	0.76765	0.87157	no		0.985928
ACBD4	ACBD4	ACBD4	chr17:43209966-43221543	OK	5.39061	3.9792	-0.437972	-2.19685	0.00025	0.00156594	yes		0.738172
ACBD5	ACBD5	ACBD5	chr10:27484142-27531068	OK	11.1096	10.5089	-0.0801992	-0.634499	0.2674	0.442555	no		0.945927
ACBD6	ACBD6	ACBD6	chr1:180257351-180472022	OK	32.0532	31.6655	-0.0175561	-0.141412	0.804	0.89251	no		0.987905
ACBD7	ACBD7	ACBD7	chr10:15117473-15130775	NOTEST	0.404413	0.301395	-0.424174	0	1	1	no		0.745265
ACCS	ACCS	ACCS	chr11:44087728-44105569	OK	16.114	17.2639	0.099441	0.754921	0.188	0.345784	no		1.07136
ACCSL	ACCSL	ACCSL	chr11:44069530-44081527	NOTEST	0	0	0	0	1	1	no		1
ACD	ACD	ACD	chr16:67679029-67694718	OK	10.7496	8.40618	-0.354767	-2.24941	5e-05	0.000373901	yes		0.781996
ACE	ACE	ACE	chr17:61554421-61575741	NOTEST	0.018315	0.0193044	0.0759055	0	1	1	no		1.05402
ACE2	ACE2	ACE2	chrX:15579155-15620192	NOTEST	0	0	0	0	1	1	no		1
ACER1	ACER1	ACER1	chr19:6306509-6333640	NOTEST	0	0	0	0	1	1	no		1
ACER2	ACER2	ACER2	chr9:19408924-19452500	OK	2.79413	3.10823	0.153694	0.773169	0.1715	0.323936	no		1.11241
ACER3	ACER3	ACER3	chr11:76571916-76737841	OK	5.90071	5.20528	-0.180911	-1.43216	0.01205	0.0417615	yes		0.882146
ACHE	ACHE	ACHE	chr7:100487614-100493754	NOTEST	0.159471	0.098895	-0.689327	0	1	1	no		0.620143
ACIN1	ACIN1	ACIN1	chr14:23527773-23569665	OK	57.7393	60.3629	0.0641082	0.349592	0.5433	0.705745	no		1.04544
ACKR1	ACKR1	ACKR1	chr1:159173802-159176290	NOTEST	0.0101027	0.0142305	0.494244	0	1	1	no		1.40858
ACKR2	ACKR2	ACKR2	chr3:42850963-42908775	NOTEST	0.00621832	0	#NAME?	0	1	1	no		#NAME?
ACKR3	ACKR3	ACKR3	chr2:237478379-237490994	NOTEST	0	0.00788519	inf	0	1	1	no		#VALUE!
ACKR4	ACKR4	ACKR4	chr3:132276981-132593050	NOTEST	0.111175	0.0959114	-0.213061	0	1	1	no		0.862705
ACLY	ACLY	ACLY	chr17:40023169-40075275	OK	144.52	160.189	0.14851	1.05323	0.0626	0.153303	no		1.10842
ACMSD	ACMSD	ACMSD	chr2:135596185-135676176	NOTEST	0.0161596	0	#NAME?	0	1	1	no		#NAME?
ACO1	ACO1	ACO1	chr9:32384600-32450832	OK	32.1195	31.4878	-0.0286541	-0.194962	0.72435	0.839757	no		0.980334
ACO2	ACO2	ACO2	chr22:41865128-41940610	OK	34.8485	36.5311	0.0680283	0.356121	0.53345	0.696007	no		1.04828
ACOT1	ACOT1	ACOT1	chr14:73945188-74025651	OK	4.02897	2.21526	-0.862937	-1.11318	0.1068	0.229192	no		0.549832
ACOT11	ACOT11	ACOT11	chr1:55013806-55100417	OK	1.63579	0.953268	-0.779034	-2.34984	5e-05	0.000373901	yes		0.582757
ACOT12	ACOT12	ACOT12	chr5:80243511-81047072	NOTEST	0	0	0	0	1	1	no		1
ACOT13	ACOT13	ACOT13	chr6:24667262-24719403	OK	5.36098	6.48741	0.275146	1.30616	0.02295	0.0705424	no		1.21012
ACOT2	ACOT2	ACOT2	chr14:74034323-74042362	OK	7.58535	7.66584	0.0152277	0.0885395	0.87585	0.933707	no		1.01061
ACOT4	ACOT4	ACOT4	chr14:74058409-74062470	NOTEST	0.0127159	0.0471858	1.89172	0	1	1	no		3.71077
ACOT6	ACOT6	ACOT6	chr14:74083547-74086592	NOTEST	0	0	0	0	1	1	no		1
ACOT7	ACOT7	ACOT7	chr1:6324331-6453826	OK	91.9056	89.9176	-0.0315487	-0.212907	0.7107	0.830364	no		0.978369
ACOT8	ACOT8	ACOT8	chr20:44462469-44486048	OK	25.1767	23.8623	-0.0773565	-0.427871	0.45965	0.631072	no		0.947793
ACOT9	ACOT9	ACOT9	chrX:23721776-23761407	OK	33.9617	29.9955	-0.179166	-1.46823	0.0114	0.0399096	yes		0.883213
ACOX1	ACOX1	ACOX1	chr17:73937588-74002080	OK	7.74251	9.20236	0.249202	1.536	0.00965	0.0348235	yes		1.18855
ACOX2	ACOX2	ACOX2	chr3:58490862-58522929	OK	6.80715	16.9145	1.31314	8.9784	5e-05	0.000373901	yes		2.48482
ACOX3	ACOX3	ACOX3	chr4:8368008-8442452	OK	6.96627	6.47585	-0.105317	-0.69286	0.2261	0.393277	no		0.929601
ACOXL	ACOXL	ACOXL	chr2:111490149-111875799	NOTEST	0.0156337	0.0208421	0.414845	0	1	1	no		1.33316
ACP1	ACP1	ACP1	chr2:264868-278282	OK	43.3043	40.4715	-0.0976049	-0.79451	0.16495	0.314578	no		0.934583
ACP2	ACP2	ACP2	chr11:47260852-47290584	OK	18.8104	15.1582	-0.311431	-2.29788	5e-05	0.000373901	yes		0.805842
ACP5	ACP5	ACP5	chr19:11685474-11689801	OK	4.65078	5.10965	0.135753	0.621927	0.2724	0.448262	no		1.09867
ACP6	ACP6	ACP6	chr1:147119167-147142634	OK	0.688598	0.168007	-2.03515	-2.60954	0.00035	0.00210017	yes		0.243983
ACPP	ACPP	ACPP	chr3:132036210-132087146	NOTEST	0	0	0	0	1	1	no		1
ACPT	ACPT	ACPT	chr19:51293671-51298481	NOTEST	0	0	0	0	1	1	no		1
ACR	ACR	ACR	chr22:51176651-51183727	NOTEST	0.0431067	0.290858	2.75433	0	1	1	no		6.74739
ACRBP	ACRBP	ACRBP	chr12:6747241-6756580	NOTEST	0.0499904	0.0992787	0.989834	0	1	1	no		1.98596
ACRC	ACRC	ACRC	chrX:70430034-70948962	OK	0.529577	0.682515	0.36602	0.124125	0.87735	0.93429	no		1.28879
ACRV1	ACRV1	ACRV1	chr11:125495030-125550793	NOTEST	0.0416266	0.0831423	0.998076	0	1	1	no		1.99733
ACSBG1	ACSBG1	ACSBG1	chr15:78463186-78527049	NOTEST	0.183507	0.116851	-0.651161	0	1	1	no		0.636768
ACSBG2	ACSBG2	ACSBG2	chr19:6135643-6193114	NOTEST	0.0159295	0	#NAME?	0	1	1	no		#NAME?
ACSF2	ACSF2	ACSF2	chr17:48503518-48552206	OK	20.6274	22.8454	0.147343	1.16675	0.0405	0.109812	no		1.10753
ACSF3	ACSF3	ACSF3	chr16:89160216-89222254	OK	7.43786	6.54926	-0.183556	-1.30247	0.0218	0.0676606	no		0.88053
ACSL1	ACSL1	ACSL1	chr4:185676748-185747268	OK	25.6338	31.5812	0.301018	2.09673	0.00035	0.00210017	yes		1.23201
ACSL3	ACSL3	ACSL3	chr2:223725731-223808119	OK	28.5853	31.5074	0.140414	0.960926	0.09825	0.215042	no		1.10222
ACSL4	ACSL4	ACSL4	chrX:108884563-108976621	OK	119.853	143.25	0.257268	1.82685	0.00125	0.00632949	yes		1.19521
ACSL5	ACSL5	ACSL5	chr10:114133915-114188138	OK	27.3213	30.1313	0.141237	1.06886	0.0626	0.153303	no		1.10285
ACSL6	ACSL6	ACSL6	chr5:131285666-131347761	NOTEST	0.0142654	0.00868988	-0.715115	0	1	1	no		0.609157
ACSM1	ACSM1	ACSM1	chr16:20634558-20702578	NOTEST	0	0	0	0	1	1	no		1
ACSM2A	ACSM2A	ACSM2A	chr16:20462782-20498991	NOTEST	0	0	0	0	1	1	no		1
ACSM2B	ACSM2B	ACSM2B	chr16:20548082-20587695	NOTEST	0	0	0	0	1	1	no		1
ACSM3	ACSM3	ACSM3	chr16:20775311-20860990	NOTEST	0.0298551	0.0266796	-0.16224	0	1	1	no		0.893636
ACSM4	ACSM4	ACSM4	chr12:7456927-7480969	NOTEST	0	0	0	0	1	1	no		1
ACSM5	ACSM5	ACSM5	chr16:20420855-20452281	NOTEST	0.343587	0.204234	-0.750457	0	1	1	no		0.594415
ACSM6	ACSM6	ACSM6	chr10:96953956-96988686	NOTEST	0	0	0	0	1	1	no		1
ACSS1	ACSS1	ACSS1	chr20:24986865-25038818	NOTEST	0.528193	0.417015	-0.340966	0	1	1	no		0.789512
ACSS2	ACSS2	ACSS2	chr20:33462765-33515769	OK	23.8008	26.9399	0.178731	1.5074	0.00845	0.0313399	yes		1.13189
ACSS3	ACSS3	ACSS3	chr12:81471808-81649582	NOTEST	0.0375009	0.0133231	-1.49299	0	1	1	no		0.355275
ACTA1	ACTA1	ACTA1	chr1:229566992-229569843	NOTEST	0.0703554	0.0463341	-0.602587	0	1	1	no		0.658572
ACTA2	ACTA2	ACTA2	chr10:90692440-90775542	OK	41.8659	39.284	-0.0918342	-0.40244	0.4818	0.651045	no		0.938329
ACTA2-AS1	ACTA2-AS1	ACTA2-AS1	chr10:90692440-90775542	NOTEST	0.045932	0.034448	-0.415082	0	1	1	no		0.749977
ACTB	ACTB	ACTB	chr7:5566778-5570232	OK	1381.05	1290.75	-0.0975589	-0.687523	0.22905	0.397129	no		0.934613
ACTBL2	ACTBL2	ACTBL2	chr5:56775842-56778636	NOTEST	0.00661331	0.0141496	1.09731	0	1	1	no		2.13955
ACTC1	ACTC1	ACTC1	chr15:35047284-35105124	NOTEST	0.00975809	0	#NAME?	0	1	1	no		#NAME?
ACTG1	ACTG1	ACTG1	chr17:79476996-79479892	OK	2812.42	2996.62	0.0915229	0.632803	0.26945	0.445058	no		1.06549
ACTG1P17	ACTG1P17	ACTG1P17	chr15:83394649-83408532	NOTEST	0.0491788	0.0413088	-0.251586	0	1	1	no		0.839972
ACTG1P20	ACTG1P20	ACTG1P20	chr1:27648635-27662891	NOTEST	0.362793	0.397133	0.130477	0	1	1	no		1.09466
ACTG1P4	ACTG1P4	ACTG1P4	chr1:104068577-104122156	NOTEST	0.217181	0.229564	0.0799983	0	1	1	no		1.05702
ACTG2	ACTG2	ACTG2	chr2:74120092-74146780	NOTEST	0.0338425	0.0180451	-0.907234	0	1	1	no		0.533206
ACTL10	ACTL10	ACTL10	chr20:32244892-32262264	OK	0.649612	0.80997	0.318291	0.463076	0.42395	0.598532	no		1.24685
ACTL6A	ACTL6A	ACTL6A	chr3:179280667-179306193	OK	23.5377	23.7903	0.0154028	0.120171	0.83245	0.909559	no		1.01073
ACTL6B	ACTL6B	ACTL6B	chr7:100240725-100254084	NOTEST	0	0	0	0	1	1	no		1
ACTL7A	ACTL7A	ACTL7A	chr9:111624507-111626035	NOTEST	0	0	0	0	1	1	no		1
ACTL7B	ACTL7B	ACTL7B	chr9:111616868-111618275	NOTEST	0.0138564	0.0309295	1.15843	0	1	1	no		2.23214
ACTL8	ACTL8	ACTL8	chr1:18081807-18153558	NOTEST	0.0109853	0.0135896	0.306927	0	1	1	no		1.23707
ACTL9	ACTL9	ACTL9	chr19:8807746-8809180	NOTEST	0	0	0	0	1	1	no		1
ACTN1	ACTN1	ACTN1	chr14:69340839-69446083	OK	151.648	120.848	-0.327531	-2.30988	5e-05	0.000373901	yes		0.796899
ACTN1-AS1	ACTN1-AS1	ACTN1-AS1	chr14:69446398-69454180	NOTEST	0	0	0	0	1	1	no		1
ACTN2	ACTN2	ACTN2	chr1:236849753-236927927	NOTEST	0	0	0	0	1	1	no		1
ACTN3	ACTN3	ACTN3	chr11:66313865-66330800	NOTEST	0.00669441	0.00670233	0.00170665	0	1	1	no		1.00118
ACTN4	ACTN4	ACTN4	chr19:39138266-39235114	OK	206.042	191.549	-0.105224	-0.737057	0.19	0.348081	no		0.929661
ACTR10	ACTR10	ACTR10	chr14:58666832-58702353	OK	39.0107	42.1712	0.112387	0.884557	0.1177	0.246618	no		1.08102
ACTR1A	ACTR1A	ACTR1A	chr10:104238985-104262512	OK	68.7083	70.9554	0.0464281	0.322379	0.5696	0.725567	no		1.0327
ACTR1B	ACTR1B	ACTR1B	chr2:98272401-98280561	OK	10.1942	13.328	0.386717	2.74084	5e-05	0.000373901	yes		1.30741
ACTR2	ACTR2	ACTR2	chr2:65454828-65498390	OK	92.9179	97.7544	0.0732056	0.513407	0.3702	0.550096	no		1.05205
ACTR3	ACTR3	ACTR3	chr2:114588759-114719129	OK	54.5163	54.1171	-0.0106027	-0.0743594	0.89935	0.947322	no		0.992678
ACTR3B	ACTR3B	ACTR3B	chr7:152456833-152552464	OK	1.30079	1.70613	0.391346	1.22445	0.02065	0.0649515	no		1.31162
ACTR3BP2	ACTR3BP2	ACTR3BP2	chr2:92129158-92130496	NOTEST	0	0	0	0	1	1	no		1
ACTR3BP5	ACTR3BP5	ACTR3BP5	chr10:38989726-38991371	NOTEST	0	0	0	0	1	1	no		1
ACTR3C	ACTR3C	ACTR3C	chr7:149944300-150035245	NOTEST	0.0532845	0	#NAME?	0	1	1	no		#NAME?
ACTR5	ACTR5	ACTR5	chr20:37377096-37401089	OK	7.74027	7.59527	-0.0272834	-0.178683	0.753	0.860874	no		0.981266
ACTR6	ACTR6	ACTR6	chr12:100593864-100618202	OK	13.3449	11.3706	-0.230986	-1.5404	0.00845	0.0313399	yes		0.852052
ACTR8	ACTR8	ACTR8	chr3:53901093-53916229	OK	9.47264	9.29638	-0.0270968	-0.205112	0.7217	0.837857	no		0.981393
ACTRT1	ACTRT1	ACTRT1	chrX:127184940-127186382	NOTEST	0	0	0	0	1	1	no		1
ACTRT2	ACTRT2	ACTRT2	chr1:2938045-2939467	NOTEST	0	0	0	0	1	1	no		1
ACTRT3	ACTRT3	ACTRT3	chr3:169484710-169487683	OK	1.81553	2.30116	0.341977	1.26995	0.02735	0.0807306	no		1.26749
ACVR1	ACVR1	ACVR1	chr2:158592957-158732374	OK	15.6709	14.423	-0.11972	-0.943741	0.09595	0.211274	no		0.920366
ACVR1B	ACVR1B	ACVR1B	chr12:52345450-52390863	OK	19.4309	18.5687	-0.0654858	-0.570624	0.31925	0.499673	no		0.955623
ACVR1C	ACVR1C	ACVR1C	chr2:158383278-158485399	NOTEST	0	0.0158784	inf	0	1	1	no		#VALUE!
ACVR2A	ACVR2A	ACVR2A	chr2:148602085-149271044	OK	2.46117	3.23577	0.394762	1.55312	0.00845	0.0313399	yes		1.31473
ACVR2B	ACVR2B	ACVR2B	chr3:38492517-38534633	OK	2.56327	2.70247	0.0762952	0.560832	0.32595	0.506965	no		1.05431
ACVR2B-AS1	ACVR2B-AS1	ACVR2B-AS1	chr3:38492517-38534633	NOTEST	0.25508	0.253455	-0.0092189	0	1	1	no		0.99363
ACVRL1	ACVRL1	ACVRL1	chr12:52301201-52317145	OK	41.7573	41.178	-0.0201523	-0.13819	0.8121	0.89733	no		0.986129
ACY1	ACY1	ACY1	chr3:52009041-52023218	OK	16.363	14.696	-0.155022	-0.842446	0.139	0.279056	no		0.898119
ACY3	ACY3	ACY3	chr11:67410025-67418130	NOTEST	0.293891	0.338678	0.204636	0	1	1	no		1.1524
ACYP1	ACYP1	ACYP1	chr14:75519927-75536186	OK	5.57708	6.36617	0.190916	0.601736	0.2768	0.452743	no		1.14149
ACYP2	ACYP2	ACYP2	chr2:54342409-54532435	OK	2.9319	3.2623	0.154053	0.538454	0.3432	0.525374	no		1.11269
ADA	ADA	ADA	chr20:43248162-43280376	OK	87.2459	113.85	0.383973	2.63654	5e-05	0.000373901	yes		1.30493
ADAD1	ADAD1	ADAD1	chr4:123300120-123350947	NOTEST	0	0	0	0	1	1	no		1
ADAD2	ADAD2	ADAD2	chr16:84224722-84230772	NOTEST	0	0	0	0	1	1	no		1
ADAL	ADAL	ADAL	chr15:43619973-43646753	OK	1.3386	1.07313	-0.318897	-1.08121	0.06125	0.15086	no		0.801683
ADAM10	ADAM10	ADAM10	chr15:58887402-59042177	OK	36.5135	36.16	-0.0140356	-0.0972866	0.8648	0.928141	no		0.990318
ADAM11	ADAM11	ADAM11	chr17:42836567-42859214	NOTEST	0.158278	0.16432	0.0540429	0	1	1	no		1.03817
ADAM12	ADAM12	ADAM12	chr10:127700953-128077127	NOTEST	0.00973014	0.0099537	0.032771	0	1	1	no		1.02298
ADAM15	ADAM15	ADAM15	chr1:155006281-155042029	OK	230.469	217.712	-0.0821548	-0.573553	0.31015	0.490436	no		0.944646
ADAM17	ADAM17	ADAM17	chr2:9629410-9695917	OK	23.8852	25.5866	0.0992745	0.863461	0.12915	0.264322	no		1.07123
ADAM18	ADAM18	ADAM18	chr8:39442086-39587583	NOTEST	0	0	0	0	1	1	no		1
ADAM19	ADAM19	ADAM19	chr5:156904311-157002831	OK	10.5196	10.9916	0.0633193	0.538608	0.34115	0.523268	no		1.04487
ADAM1A	ADAM1A	ADAM1A	chr12:112336866-112339706	OK	1.09214	1.19672	0.13193	0.451108	0.4265	0.601041	no		1.09576
ADAM2	ADAM2	ADAM2	chr8:39601254-39695808	NOTEST	0	0	0	0	1	1	no		1
ADAM20	ADAM20	ADAM20	chr14:70989077-71001732	NOTEST	0.0466709	0.0328396	-0.507085	0	1	1	no		0.703643
ADAM20P1	ADAM20P1	ADAM20P1	chr14:70935595-70950473	NOTEST	0.0910104	0.118712	0.383368	0	1	1	no		1.30438
ADAM21	ADAM21	ADAM21	chr14:70918873-70926622	OK	0.790971	0.405351	-0.964455	-2.28152	0.0005	0.0028739	yes		0.512472
ADAM21P1	ADAM21P1	ADAM21P1	chr14:70712469-70714518	NOTEST	0.2542	0.10505	-1.27489	0	1	1	no		0.413257
ADAM22	ADAM22	ADAM22	chr7:87563565-87832204	OK	4.89612	4.98529	0.0260363	0.147978	0.79595	0.887931	no		1.01821
ADAM23	ADAM23	ADAM23	chr2:207308367-207485854	OK	0.660712	0.588854	-0.166112	-0.622557	0.2773	0.453143	no		0.891241
ADAM28	ADAM28	ADAM28	chr8:24151552-24406131	NOTEST	0.0395684	0.0496447	0.327289	0	1	1	no		1.25465
ADAM29	ADAM29	ADAM29	chr4:175839508-175899331	NOTEST	0	0	0	0	1	1	no		1
ADAM30	ADAM30	ADAM30	chr1:120436155-120439147	NOTEST	0	0	0	0	1	1	no		1
ADAM32	ADAM32	ADAM32	chr8:38965049-39142436	NOTEST	0.0761783	0.185924	1.28726	0	1	1	no		2.44064
ADAM33	ADAM33	ADAM33	chr20:3648619-3662778	NOTEST	0.00559462	0	#NAME?	0	1	1	no		#NAME?
ADAM3A	ADAM3A	ADAM3A	chr8:39308563-39380508	NOTEST	0	0	0	0	1	1	no		1
ADAM5	ADAM5	ADAM5	chr8:39172181-39260375	NOTEST	0	0	0	0	1	1	no		1
ADAM6	ADAM6	ADAM6	chr14:106435817-106438358	NOTEST	0	0	0	0	1	1	no		1
ADAM7	ADAM7	ADAM7	chr8:24151552-24406131	NOTEST	0	0	0	0	1	1	no		1
ADAM8	ADAM8	ADAM8	chr10:135075919-135090407	OK	0.955633	1.21338	0.344499	1.16715	0.03565	0.0995076	no		1.26971
ADAM9	ADAM9	ADAM9	chr8:38854504-38962779	OK	204.666	216.429	0.0806223	0.570748	0.3182	0.498721	no		1.05747
ADAMDEC1	ADAMDEC1	ADAMDEC1	chr8:24151552-24406131	NOTEST	0	0	0	0	1	1	no		1
ADAMTS1	ADAMTS1	ADAMTS1	chr21:28208605-28217728	OK	9.10256	13.6912	0.588906	4.79108	5e-05	0.000373901	yes		1.50411
ADAMTS10	ADAMTS10	ADAMTS10	chr19:8645123-8675620	OK	5.69103	4.86806	-0.225344	-1.48142	0.0102	0.0364378	yes		0.855391
ADAMTS12	ADAMTS12	ADAMTS12	chr5:33527286-33892124	NOTEST	0.00387056	0	#NAME?	0	1	1	no		#NAME?
ADAMTS13	ADAMTS13	ADAMTS13	chr9:136228324-136324525	NOTEST	0.265318	0.316597	0.254924	0	1	1	no		1.19327
ADAMTS14	ADAMTS14	ADAMTS14	chr10:72432558-72522195	NOTEST	0	0	0	0	1	1	no		1
ADAMTS15	ADAMTS15	ADAMTS15	chr11:130318868-130346539	NOTEST	0	0	0	0	1	1	no		1
ADAMTS16	ADAMTS16	ADAMTS16	chr5:5140442-5320412	OK	1.19825	0.834171	-0.522514	-2.15298	0.00025	0.00156594	yes		0.696158
ADAMTS17	ADAMTS17	ADAMTS17	chr15:100511642-100882183	NOTEST	0.0145855	0.0323453	1.14902	0	1	1	no		2.21763
ADAMTS18	ADAMTS18	ADAMTS18	chr16:77316024-77469011	NOTEST	0.153321	0.0861228	-0.832087	0	1	1	no		0.561716
ADAMTS19	ADAMTS19	ADAMTS19	chr5:128795251-129074376	NOTEST	0.00352111	0	#NAME?	0	1	1	no		#NAME?
ADAMTS19-AS1	ADAMTS19-AS1	ADAMTS19-AS1	chr5:128795251-129074376	NOTEST	0	0	0	0	1	1	no		1
ADAMTS2	ADAMTS2	ADAMTS2	chr5:178537851-178772431	NOTEST	0	0	0	0	1	1	no		1
ADAMTS20	ADAMTS20	ADAMTS20	chr12:43748011-43945724	NOTEST	0	0	0	0	1	1	no		1
ADAMTS3	ADAMTS3	ADAMTS3	chr4:73146685-73434516	NOTEST	0.0186495	0.00865538	-1.10747	0	1	1	no		0.464107
ADAMTS4	ADAMTS4	ADAMTS4	chr1:161159537-161168845	NOTEST	0.00409284	0.00730122	0.835037	0	1	1	no		1.7839
ADAMTS5	ADAMTS5	ADAMTS5	chr21:28290230-28339439	NOTEST	0	0	0	0	1	1	no		1
ADAMTS6	ADAMTS6	ADAMTS6	chr5:64444562-64777704	OK	0.625729	0.670241	0.0991406	0.402892	0.4927	0.661027	no		1.07114
ADAMTS7	ADAMTS7	ADAMTS7	chr15:79051544-79103773	OK	13.7754	13.9382	0.016953	0.145589	0.79885	0.889409	no		1.01182
ADAMTS7P1	ADAMTS7P1	ADAMTS7P1	chr15:82632349-83195272	NOTEST	0.00353799	0.00861507	1.28393	0	1	1	no		2.43501
ADAMTS8	ADAMTS8	ADAMTS8	chr11:130274817-130298539	NOTEST	0	0	0	0	1	1	no		1
ADAMTS9	ADAMTS9	ADAMTS9	chr3:64501330-64997143	NOTEST	0.362341	0.429467	0.2452	0	1	1	no		1.18526
ADAMTS9-AS1	ADAMTS9-AS1	ADAMTS9-AS1	chr3:64501330-64997143	NOTEST	0.00492276	0.00526891	0.0980365	0	1	1	no		1.07032
ADAMTS9-AS2	ADAMTS9-AS2	ADAMTS9-AS2	chr3:64501330-64997143	NOTEST	0	0	0	0	1	1	no		1
ADAMTSL1	ADAMTSL1	ADAMTSL1	chr9:18474078-18910947	NOTEST	0.0389394	0.0494592	0.345009	0	1	1	no		1.27016
ADAMTSL2	ADAMTSL2	ADAMTSL2	chr9:136397285-136440641	NOTEST	0	0	0	0	1	1	no		1
ADAMTSL3	ADAMTSL3	ADAMTSL3	chr15:84322837-84708593	NOTEST	0	0	0	0	1	1	no		1
ADAMTSL4	ADAMTSL4	ADAMTSL4	chr1:150521844-150552214	OK	9.52695	8.25982	-0.205904	-0.3291	0.57415	0.729567	no		0.866995
ADAMTSL4-AS1	ADAMTSL4-AS1	ADAMTSL4-AS1	chr1:150521844-150552214	NOTEST	0.101024	0.0696973	-0.535531	0	1	1	no		0.689905
ADAMTSL5	ADAMTSL5	ADAMTSL5	chr19:1505016-1513188	OK	5.95097	4.54488	-0.388883	-2.37206	5e-05	0.000373901	yes		0.763721
ADAP1	ADAP1	ADAP1	chr7:937536-995043	NOTEST	0.104992	0.0209134	-2.32778	0	1	1	no		0.19919
ADAP2	ADAP2	ADAP2	chr17:29248753-29286211	NOTEST	0.156397	0.16853	0.10779	0	1	1	no		1.07758
ADAR	ADAR	ADAR	chr1:154554533-154600456	OK	54.6014	57.1655	0.0662075	0.465622	0.40965	0.5858	no		1.04696
ADARB1	ADARB1	ADARB1	chr21:46494492-46646478	OK	7.07485	7.25631	0.0365373	0.245392	0.6594	0.792689	no		1.02565
ADARB2	ADARB2	ADARB2	chr10:1223252-1779670	NOTEST	0	0	0	0	1	1	no		1
ADARB2-AS1	ADARB2-AS1	ADARB2-AS1	chr10:1223252-1779670	NOTEST	0	0	0	0	1	1	no		1
ADAT1	ADAT1	ADAT1	chr16:75632246-75657221	OK	7.24376	7.08068	-0.0328523	-0.235261	0.6819	0.81036	no		0.977486
ADAT2	ADAT2	ADAT2	chr6:143743968-143771841	OK	1.71027	1.97885	0.210436	1.22699	0.03245	0.0923817	no		1.15704
ADAT3	ADAT3	ADAT3	chr19:1905370-1926012	OK	1.48466	2.30359	0.633755	0.535147	0.34935	0.531448	no		1.5516
ADCK1	ADCK1	ADCK1	chr14:78266425-78400297	OK	4.99358	4.92699	-0.0193685	-0.105089	0.8573	0.923657	no		0.986664
ADCK2	ADCK2	ADCK2	chr7:140372952-140394908	OK	10.4196	7.19649	-0.533932	-3.54602	5e-05	0.000373901	yes		0.69067
ADCK3	ADCK3	ADCK3	chr1:227127937-227175246	OK	6.46008	5.28631	-0.289291	-1.84428	0.0013	0.00653208	yes		0.818304
ADCK4	ADCK4	ADCK4	chr19:41197433-41222790	OK	9.08177	11.4248	0.331126	2.27675	0.0001	0.000697417	yes		1.25799
ADCK5	ADCK5	ADCK5	chr8:145597703-145634733	OK	4.44183	5.91475	0.413162	0.560371	0.3283	0.509536	no		1.3316
ADCY1	ADCY1	ADCY1	chr7:45613738-45762714	NOTEST	0	0	0	0	1	1	no		1
ADCY10	ADCY10	ADCY10	chr1:167778624-167883464	NOTEST	0.00354208	0.00632004	0.835336	0	1	1	no		1.78427
ADCY10P1	ADCY10P1	ADCY10P1	chr6:41040706-41108573	OK	0.374865	0.686485	0.872857	1.44633	0.0153	0.0509085	no		1.83129
ADCY2	ADCY2	ADCY2	chr5:7396342-7830194	OK	1.16315	0.80905	-0.523738	-2.38844	0.0001	0.000697417	yes		0.695567
ADCY3	ADCY3	ADCY3	chr2:25013135-25142055	OK	12.0743	10.9728	-0.138007	-0.894712	0.12675	0.260699	no		0.908774
ADCY4	ADCY4	ADCY4	chr14:24787554-24804277	OK	4.05224	5.17848	0.353809	2.24926	0.00015	0.00100331	yes		1.27793
ADCY5	ADCY5	ADCY5	chr3:123001142-123167392	NOTEST	0.0321958	0.0405007	0.331076	0	1	1	no		1.25795
ADCY6	ADCY6	ADCY6	chr12:49159973-49182879	OK	20.1256	16.5978	-0.278039	-1.89117	0.001	0.00523872	yes		0.824711
ADCY7	ADCY7	ADCY7	chr16:50300450-50352045	OK	0.653568	0.344264	-0.924821	-2.80519	5e-05	0.000373901	yes		0.526746
ADCY8	ADCY8	ADCY8	chr8:131792546-132052835	NOTEST	0	0	0	0	1	1	no		1
ADCY9	ADCY9	ADCY9	chr16:4012649-4166186	OK	2.78956	1.84292	-0.598045	-3.86309	5e-05	0.000373901	yes		0.660649
ADCYAP1	ADCYAP1	ADCYAP1	chr18:904943-912173	NOTEST	0	0	0	0	1	1	no		1
ADCYAP1R1	ADCYAP1R1	ADCYAP1R1	chr7:31092075-31151093	NOTEST	0.0252764	0.0127031	-0.992605	0	1	1	no		0.502569
ADD1	ADD1	ADD1	chr4:2845583-2931802	OK	64.1579	63.1648	-0.0225058	-0.158133	0.78805	0.883826	no		0.984521
ADD2	ADD2	ADD2	chr2:70889215-70995375	OK	4.49513	3.99582	-0.169871	-1.08401	0.05775	0.144474	no		0.888922
ADD3	ADD3	ADD3	chr10:111705316-111895323	OK	6.81051	7.12132	0.064381	0.46909	0.4152	0.59088	no		1.04564
ADD3-AS1	ADD3-AS1	ADD3-AS1	chr10:111705316-111895323	NOTEST	0	0.0335439	inf	0	1	1	no		#VALUE!
ADGB	ADGB	ADGB	chr6:146920135-147136597	NOTEST	0	0	0	0	1	1	no		1
ADGRA1	ADGRA1	ADGRA1	chr10:134901507-134945179	NOTEST	0	0	0	0	1	1	no		1
ADGRA1-AS1	ADGRA1-AS1	ADGRA1-AS1	chr10:134898752-134900201	NOTEST	0	0	0	0	1	1	no		1
ADGRA2	ADGRA2	ADGRA2	chr8:37654400-37707431	NOTEST	0.116195	0.0868895	-0.41929	0	1	1	no		0.747793
ADGRA3	ADGRA3	ADGRA3	chr4:22388996-22517677	OK	5.38293	6.89214	0.35656	2.58686	5e-05	0.000373901	yes		1.28037
ADGRB1	ADGRB1	ADGRB1	chr8:143545376-143626368	NOTEST	0.0130421	0.0183103	0.489483	0	1	1	no		1.40394
ADGRB2	ADGRB2	ADGRB2	chr1:32192705-32229664	OK	2.01626	1.33814	-0.591453	-3.04624	5e-05	0.000373901	yes		0.663674
ADGRB3	ADGRB3	ADGRB3	chr6:69345631-70099403	NOTEST	0.152718	0.19578	0.358363	0	1	1	no		1.28197
ADGRD1	ADGRD1	ADGRD1	chr12:131438451-131626008	NOTEST	0.00355084	0.0204928	2.52888	0	1	1	no		5.77123
ADGRE1	ADGRE1	ADGRE1	chr19:6887559-6940464	OK	2.16298	0.806826	-1.42269	-4.57984	5e-05	0.000373901	yes		0.373016
ADGRE2	ADGRE2	ADGRE2	chr19:14800851-14889353	NOTEST	0.00905114	0.00577712	-0.64775	0	1	1	no		0.638275
ADGRE3	ADGRE3	ADGRE3	chr19:14729928-14785730	NOTEST	0	0	0	0	1	1	no		1
ADGRE4P	ADGRE4P	ADGRE4P	chr19:6952510-6990857	NOTEST	0	0	0	0	1	1	no		1
ADGRE5	ADGRE5	ADGRE5	chr19:14491955-14519537	OK	7.63128	3.32398	-1.19901	-7.2932	5e-05	0.000373901	yes		0.435574
ADGRF1	ADGRF1	ADGRF1	chr6:46965439-47010099	NOTEST	0	0	0	0	1	1	no		1
ADGRF2	ADGRF2	ADGRF2	chr6:47624325-47665533	NOTEST	0	0	0	0	1	1	no		1
ADGRF3	ADGRF3	ADGRF3	chr2:26531040-26618759	NOTEST	0.0896465	0.0887588	-0.0143562	0	1	1	no		0.990098
ADGRF4	ADGRF4	ADGRF4	chr6:47666288-47689757	NOTEST	0.0464807	0.0875173	0.912938	0	1	1	no		1.88288
ADGRF5	ADGRF5	ADGRF5	chr6:46820241-46922675	NOTEST	0.0376154	0.0378951	0.0106889	0	1	1	no		1.00744
ADGRG1	ADGRG1	ADGRG1	chr16:57653604-57698951	OK	50.585	55.7806	0.141052	0.975497	0.08805	0.198164	no		1.10271
ADGRG2	ADGRG2	ADGRG2	chrX:19007424-19140755	NOTEST	0.0199044	0.0189834	-0.0683479	0	1	1	no		0.95373
ADGRG3	ADGRG3	ADGRG3	chr16:57702156-57723290	NOTEST	0.228017	0.158244	-0.526994	0	1	1	no		0.693999
ADGRG4	ADGRG4	ADGRG4	chrX:135383121-135499047	NOTEST	0	0.00234611	inf	0	1	1	no		#VALUE!
ADGRG5	ADGRG5	ADGRG5	chr16:57576332-57611100	NOTEST	0.0465255	0.00547919	-3.08599	0	1	1	no		0.117767
ADGRG6	ADGRG6	ADGRG6	chr6:142623055-142767403	OK	8.61005	8.17171	-0.075384	-0.626838	0.2773	0.453143	no		0.949089
ADGRG7	ADGRG7	ADGRG7	chr3:100328432-100414325	NOTEST	0	0	0	0	1	1	no		1
ADGRL1	ADGRL1	ADGRL1	chr19:14247963-14316997	OK	6.02439	7.60394	0.335934	2.66915	5e-05	0.000373901	yes		1.26219
ADGRL2	ADGRL2	ADGRL2	chr1:82165454-82458422	OK	7.83968	8.71938	0.153431	1.25632	0.02745	0.0809488	no		1.11221
ADGRL3	ADGRL3	ADGRL3	chr4:62362838-63027483	NOTEST	0.0644809	0.0425835	-0.598576	0	1	1	no		0.660405
ADGRL3-AS1	ADGRL3-AS1	ADGRL3-AS1	chr4:62362838-63027483	NOTEST	0	0	0	0	1	1	no		1
ADGRL4	ADGRL4	ADGRL4	chr1:79355448-79472495	OK	12.8293	11.9863	-0.0980581	-0.781136	0.1788	0.334167	no		0.93429
ADGRV1	ADGRV1	ADGRV1	chr5:89854616-90460033	NOTEST	0.0202954	0.0158354	-0.358002	0	1	1	no		0.780244
ADH1A	ADH1A	ADH1A	chr4:100010007-100222513	NOTEST	0.0128795	0.017298	0.425521	0	1	1	no		1.34306
ADH1B	ADH1B	ADH1B	chr4:100227543-100242599	NOTEST	0	0	0	0	1	1	no		1
ADH1C	ADH1C	ADH1C	chr4:100257648-100274202	NOTEST	0	0	0	0	1	1	no		1
ADH4	ADH4	ADH4	chr4:100010007-100222513	NOTEST	0	0.033196	inf	0	1	1	no		#VALUE!
ADH5	ADH5	ADH5	chr4:99992129-100009939	OK	47.6575	43.3586	-0.136385	-0.929152	0.10455	0.225298	no		0.909796
ADH6	ADH6	ADH6	chr4:100010007-100222513	NOTEST	0.0151307	0.0550447	1.86313	0	1	1	no		3.63796
ADH7	ADH7	ADH7	chr4:100333417-100356667	NOTEST	0	0	0	0	1	1	no		1
ADHFE1	ADHFE1	ADHFE1	chr8:67344717-67381044	NOTEST	0.111928	0.0834901	-0.422898	0	1	1	no		0.745925
ADI1	ADI1	ADI1	chr2:3501689-3523350	OK	35.8575	47.7887	0.414397	3.42964	5e-05	0.000373901	yes		1.33274
ADIG	ADIG	ADIG	chr20:37209837-37217106	NOTEST	0.0770743	0	#NAME?	0	1	1	no		#NAME?
ADIPOQ	ADIPOQ	ADIPOQ	chr3:186560462-186576252	NOTEST	0	0	0	0	1	1	no		1
ADIPOQ-AS1	ADIPOQ-AS1	ADIPOQ-AS1	chr3:186560462-186576252	NOTEST	0	0	0	0	1	1	no		1
ADIPOR1	ADIPOR1	ADIPOR1	chr1:202909952-202927700	OK	55.9805	51.6304	-0.116705	-0.789275	0.17525	0.329167	no		0.922292
ADIPOR2	ADIPOR2	ADIPOR2	chr12:1800246-1897845	OK	66.9769	75.6218	0.17514	1.22632	0.03295	0.0935265	no		1.12907
ADIRF	ADIRF	ADIRF	chr10:88728187-88769960	OK	38.536	35.5666	-0.115684	-0.749065	0.193	0.351813	no		0.922945
ADK	ADK	ADK	chr10:75910942-76469061	OK	19.2806	17.9429	-0.103734	-0.79344	0.1694	0.320799	no		0.930621
ADM	ADM	ADM	chr11:10326526-10328949	OK	90.1385	108.027	0.261172	1.79416	0.0015	0.00741405	yes		1.19845
ADM2	ADM2	ADM2	chr22:50919984-50924866	NOTEST	0.00479584	0.0144104	1.58725	0	1	1	no		3.00476
ADM5	ADM5	ADM5	chr19:50191941-50194247	OK	0.63032	0.932785	0.565461	1.39785	0.0171	0.0557478	no		1.47986
ADNP	ADNP	ADNP	chr20:49505454-49575060	OK	19.5734	23.1652	0.243064	1.43802	0.01425	0.0480063	yes		1.1835
ADNP-AS1	ADNP-AS1	ADNP-AS1	chr20:49505454-49575060	OK	0.761024	0.900766	0.24321	0.107184	0.90645	0.95026	no		1.18362
ADNP2	ADNP2	ADNP2	chr18:77866914-77898228	OK	7.94034	7.9729	0.00590376	0.0467965	0.93175	0.963957	no		1.0041
ADO	ADO	ADO	chr10:64564515-64568239	OK	6.6039	6.49079	-0.0249226	-0.175196	0.7619	0.867659	no		0.982873
ADORA1	ADORA1	ADORA1	chr1:203096835-203136533	OK	1.19553	1.04141	-0.199112	-0.652249	0.24395	0.414969	no		0.871087
ADORA2A	ADORA2A	ADORA2A	chr22:24666784-24890783	OK	0.732873	2.4405	1.73554	1.41016	0.04525	0.119687	no		3.33004
ADORA2A-AS1	ADORA2A-AS1	ADORA2A-AS1	chr22:24666784-24890783	NOTEST	0.109956	0.482669	2.13411	0	1	1	no		4.38966
ADORA2B	ADORA2B	ADORA2B	chr17:15848230-15879210	OK	4.20793	2.87935	-0.547366	-2.45269	0.0001	0.000697417	yes		0.684268
ADORA3	ADORA3	ADORA3	chr1:112025969-112106625	NOTEST	0.0117534	0.0613389	2.38373	0	1	1	no		5.21884
ADPGK	ADPGK	ADPGK	chr15:73043707-73090540	OK	35.8661	39.8261	0.151092	1.1772	0.0397	0.108068	no		1.11041
ADPGK-AS1	ADPGK-AS1	ADPGK-AS1	chr15:73043707-73090540	OK	0.365612	0.582266	0.671363	0.580776	0.31275	0.492978	no		1.59258
ADPRH	ADPRH	ADPRH	chr3:119298279-119308792	NOTEST	0.0568648	0.0237059	-1.26229	0	1	1	no		0.416882
ADPRHL1	ADPRHL1	ADPRHL1	chr13:114076254-114107839	OK	0.570096	0.984887	0.788754	1.76774	0.0034	0.0147817	yes		1.72758
ADPRHL2	ADPRHL2	ADPRHL2	chr1:36554452-36559533	OK	18.5475	19.2241	0.0516973	0.381188	0.50545	0.672538	no		1.03648
ADPRM	ADPRM	ADPRM	chr17:10600926-10614875	OK	4.983	4.57605	-0.122912	-0.571918	0.31685	0.497421	no		0.918332
ADRA1A	ADRA1A	ADRA1A	chr8:26605666-26722922	NOTEST	0	0	0	0	1	1	no		1
ADRA1B	ADRA1B	ADRA1B	chr5:159343739-159400017	OK	2.58887	3.25066	0.328412	1.49094	0.00965	0.0348235	yes		1.25563
ADRA1D	ADRA1D	ADRA1D	chr20:4201277-4229659	NOTEST	0.021221	0.0743795	1.80941	0	1	1	no		3.50499
ADRA2A	ADRA2A	ADRA2A	chr10:112836789-112840662	NOTEST	0	0	0	0	1	1	no		1
ADRA2B	ADRA2B	ADRA2B	chr2:96778622-96781984	NOTEST	0.0217302	0.00581373	-1.90217	0	1	1	no		0.267541
ADRA2C	ADRA2C	ADRA2C	chr4:3768295-3770253	NOTEST	0	0	0	0	1	1	no		1
ADRB1	ADRB1	ADRB1	chr10:115803805-115806667	NOTEST	0.273622	0.154366	-0.825826	0	1	1	no		0.564159
ADRB2	ADRB2	ADRB2	chr5:148206155-148208197	OK	20.1434	17.132	-0.233614	-1.78895	0.0019	0.00905946	yes		0.850502
ADRB3	ADRB3	ADRB3	chr8:37820513-37824184	NOTEST	0	0	0	0	1	1	no		1
ADRBK1	ADRBK1	ADRBK1	chr11:67033904-67054029	OK	11.1142	11.0872	-0.00352159	-0.0272394	0.96225	0.980565	no		0.997562
ADRBK2	ADRBK2	ADRBK2	chr22:25960860-26125258	OK	0.689587	0.426221	-0.694131	-2.84405	5e-05	0.000373901	yes		0.618082
ADRM1	ADRM1	ADRM1	chr20:60877951-60883918	OK	144.731	152.638	0.0767424	0.531034	0.3515	0.533499	no		1.05463
ADSL	ADSL	ADSL	chr22:40742503-40762575	OK	54.2688	48.9462	-0.148925	-1.27514	0.0267	0.079264	no		0.901922
ADSS	ADSS	ADSS	chr1:244571793-244615436	OK	25.2716	22.7317	-0.152806	-1.28664	0.0254	0.076243	no		0.899499
ADSSL1	ADSSL1	ADSSL1	chr14:105190533-105213647	OK	20.0451	33.3565	0.734718	5.76143	5e-05	0.000373901	yes		1.66407
ADTRP	ADTRP	ADTRP	chr6:11713887-11779280	OK	22.3746	18.3478	-0.286259	-2.1854	0.0002	0.00128915	yes		0.820026
AEBP1	AEBP1	AEBP1	chr7:44143959-44154164	NOTEST	0	0.00585426	inf	0	1	1	no		#VALUE!
AEBP2	AEBP2	AEBP2	chr12:19592607-19675173	OK	7.60714	7.77175	0.0308849	0.241646	0.67055	0.801455	no		1.02164
AEN	AEN	AEN	chr15:89164526-89175512	OK	38.939	29.2843	-0.411088	-3.12503	5e-05	0.000373901	yes		0.752056
AES	AES	AES	chr19:3052907-3062964	OK	177.458	167.102	-0.0867464	-0.607544	0.28775	0.464597	no		0.941644
AFAP1	AFAP1	AFAP1	chr4:7755816-7942023	OK	16.7547	13.7593	-0.284154	-1.92761	0.0005	0.0028739	yes		0.821223
AFAP1-AS1	AFAP1-AS1	AFAP1-AS1	chr4:7755816-7942023	NOTEST	0.0736346	0.100784	0.452814	0	1	1	no		1.36871
AFAP1L1	AFAP1L1	AFAP1L1	chr5:148651400-148721367	OK	3.07515	3.59513	0.225388	1.35771	0.0161	0.0531009	no		1.16909
AFAP1L2	AFAP1L2	AFAP1L2	chr10:116054582-116164537	NOTEST	0	0	0	0	1	1	no		1
AFF1	AFF1	AFF1	chr4:87856153-88062206	OK	8.41167	7.16113	-0.232206	-1.97833	0.0005	0.0028739	yes		0.851332
AFF2	AFF2	AFF2	chrX:147582138-148082193	NOTEST	0	0.00189062	inf	0	1	1	no		#VALUE!
AFF3	AFF3	AFF3	chr2:100163715-100759037	OK	2.67596	1.70914	-0.646789	-4.16862	5e-05	0.000373901	yes		0.6387
AFF4	AFF4	AFF4	chr5:132211070-132299354	OK	24.2809	28.4989	0.231085	1.61499	0.0051	0.0207355	yes		1.17372
AFG3L1P	AFG3L1P	AFG3L1P	chr16:90036182-90067195	OK	6.44382	7.47574	0.214302	1.16525	0.04185	0.112491	no		1.16014
AFG3L2	AFG3L2	AFG3L2	chr18:12307667-12377275	OK	35.5461	36.9192	0.0546802	0.159512	0.7831	0.880899	no		1.03863
AFM	AFM	AFM	chr4:74347461-74369718	NOTEST	0	0	0	0	1	1	no		1
AFMID	AFMID	AFMID	chr17:76183397-76203782	OK	11.8441	7.67517	-0.625898	-3.60844	5e-05	0.000373901	yes		0.648016
AFP	AFP	AFP	chr4:74301935-74321502	NOTEST	0	0.00814335	inf	0	1	1	no		#VALUE!
AFTPH	AFTPH	AFTPH	chr2:64751438-64820138	OK	6.80043	6.81684	0.00347846	0.0249736	0.9641	0.98162	no		1.00241
AGA	AGA	AGA	chr4:178351928-178363657	OK	5.72511	6.66208	0.218669	1.26765	0.0275	0.0810578	no		1.16366
AGAP1	AGAP1	AGAP1	chr2:236402732-237040444	OK	1.63097	1.7781	0.1246	0.561508	0.32265	0.503011	no		1.09021
AGAP1-IT1	AGAP1-IT1	AGAP1-IT1	chr2:236402732-237040444	NOTEST	0.144743	0	#NAME?	0	1	1	no		#NAME?
AGAP11	AGAP11	AGAP11	chr10:88728187-88769960	NOTEST	0.403809	0.337931	-0.256944	0	1	1	no		0.836859
AGAP2	AGAP2	AGAP2	chr12:58118075-58135944	OK	1.59604	0.947227	-0.752719	-1.96211	0.0007	0.00384551	yes		0.593484
AGAP2-AS1	AGAP2-AS1	AGAP2-AS1	chr12:58118075-58135944	OK	30.3293	29.7058	-0.0299708	-0.223238	0.69565	0.820713	no		0.97944
AGAP3	AGAP3	AGAP3	chr7:150782917-150841523	OK	19.9269	22.1002	0.149347	1.2161	0.0351	0.098193	no		1.10907
AGAP4	AGAP4	AGAP4	chr10:46321039-46349325	OK	1.32054	1.45718	0.142054	0.498231	0.3731	0.552752	no		1.10348
AGAP5	AGAP5	AGAP5	chr10:75434032-75457554	OK	1.29331	1.37473	0.0880826	0.298939	0.59545	0.745648	no		1.06296
AGAP6	AGAP6	AGAP6	chr10:51748077-51770259	OK	3.40904	3.89603	0.192637	1.03618	0.0668	0.160674	no		1.14285
AGAP7P	AGAP7P	AGAP7P	chr10:51371378-51734610	NOTEST	0.173454	0.219392	0.338953	0	1	1	no		1.26484
AGAP9	AGAP9	AGAP9	chr10:48215723-48237508	NOTEST	0.00783327	0.00686174	-0.19104	0	1	1	no		0.875974
AGBL1	AGBL1	AGBL1	chr15:86685241-87572283	NOTEST	0	0	0	0	1	1	no		1
AGBL1-AS1	AGBL1-AS1	AGBL1-AS1	chr15:86685241-87572283	NOTEST	0	0	0	0	1	1	no		1
AGBL2	AGBL2	AGBL2	chr11:47681142-47736928	NOTEST	0	0.00542077	inf	0	1	1	no		#VALUE!
AGBL3	AGBL3	AGBL3	chr7:134671258-134855578	NOTEST	0.0643543	0.06213	-0.0507456	0	1	1	no		0.965437
AGBL4	AGBL4	AGBL4	chr1:48998526-50489626	NOTEST	0	0	0	0	1	1	no		1
AGBL4-IT1	AGBL4-IT1	AGBL4-IT1	chr1:48998526-50489626	NOTEST	0	0	0	0	1	1	no		1
AGBL5	AGBL5	AGBL5	chr2:27274490-27294567	OK	12.0378	13.7999	0.197087	0.596762	0.29775	0.475856	no		1.14638
AGBL5-AS1	AGBL5-AS1	AGBL5-AS1	chr2:27272550-27273132	NOTEST	0	0	0	0	1	1	no		1
AGER	AGER	AGER	chr6_ssto_hap7:3496472-3499827	OK	1.05526	2.24554	1.08947	2.71115	5e-05	0.000373901	yes		2.12796
AGFG1	AGFG1	AGFG1	chr2:228336847-228425938	OK	9.64188	9.25322	-0.0593594	-0.516399	0.36365	0.543615	no		0.95969
AGFG2	AGFG2	AGFG2	chr7:100136833-100165843	OK	45.4521	33.8685	-0.424403	-2.94092	5e-05	0.000373901	yes		0.745147
AGGF1	AGGF1	AGGF1	chr5:76326209-76361058	OK	7.27007	7.81842	0.104908	0.794951	0.1617	0.310381	no		1.07543
AGK	AGK	AGK	chr7:141251077-141354209	OK	14.1571	13.1976	-0.101244	-0.788625	0.16715	0.317749	no		0.932229
AGL	AGL	AGL	chr1:100315639-100389579	OK	3.64878	3.51023	-0.0558481	-0.400012	0.48735	0.655904	no		0.962029
AGMAT	AGMAT	AGMAT	chr1:15853307-15911605	OK	0.798071	0.505763	-0.658055	-0.876124	0.13095	0.267082	no		0.633732
AGMO	AGMO	AGMO	chr7:15239942-15601640	OK	4.12539	3.35757	-0.297113	-1.53799	0.0087	0.0321137	yes		0.813879
AGO1	AGO1	AGO1	chr1:36348809-36389899	OK	4.39758	4.40133	0.00122871	0.00928551	0.987	0.992755	no		1.00085
AGO2	AGO2	AGO2	chr8:141541263-141645646	OK	6.82076	7.25165	0.0883757	0.623207	0.2716	0.44736	no		1.06317
AGO3	AGO3	AGO3	chr1:36396682-36522063	OK	2.40389	2.72905	0.183031	0.959064	0.0921	0.205234	no		1.13527
AGO4	AGO4	AGO4	chr1:36273827-36323490	OK	2.94296	3.18934	0.115989	0.795866	0.16285	0.311817	no		1.08372
AGPAT1	AGPAT1	AGPAT1	chr6_ssto_hap7:3468303-3493616	OK	39.3987	43.9727	0.158462	0.943841	0.1021	0.22144	no		1.1161
AGPAT2	AGPAT2	AGPAT2	chr9:139567594-139581911	OK	72.0883	41.0739	-0.811542	-6.01979	5e-05	0.000373901	yes		0.569773
AGPAT3	AGPAT3	AGPAT3	chr21:45285115-45407475	OK	15.9128	13.5646	-0.230345	-1.74177	0.00345	0.0149677	yes		0.852431
AGPAT4	AGPAT4	AGPAT4	chr6:161551056-161695107	OK	2.11943	1.76239	-0.266138	-1.65118	0.0042	0.0176482	yes		0.831543
AGPAT4-IT1	AGPAT4-IT1	AGPAT4-IT1	chr6:161551056-161695107	NOTEST	0.135047	0.159695	0.241856	0	1	1	no		1.18251
AGPAT5	AGPAT5	AGPAT5	chr8:6565877-6619021	OK	23.9056	29.8394	0.319871	2.20106	5e-05	0.000373901	yes		1.24822
AGPAT6	AGPAT6	AGPAT6	chr8:41386724-41482520	OK	12.3115	13.5219	0.135285	1.15288	0.044	0.116879	no		1.09831
AGPAT9	AGPAT9	AGPAT9	chr4:84457066-84527027	OK	3.00533	0.734384	-2.03292	-6.012	5e-05	0.000373901	yes		0.24436
AGPS	AGPS	AGPS	chr2:178257470-178408564	OK	11.3747	11.1856	-0.0241823	-0.210606	0.7145	0.833002	no		0.983378
AGR2	AGR2	AGR2	chr7:16832263-16844738	NOTEST	0	0.0375935	inf	0	1	1	no		#VALUE!
AGR3	AGR3	AGR3	chr7:16899029-16921613	NOTEST	0	0	0	0	1	1	no		1
AGRN	AGRN	AGRN	chr1:955502-991499	OK	39.8832	47.7088	0.258471	1.80828	0.00215	0.0100546	yes		1.19621
AGRP	AGRP	AGRP	chr16:67516473-67517716	NOTEST	0.0582704	0	#NAME?	0	1	1	no		#NAME?
AGT	AGT	AGT	chr1:230838271-230850336	OK	0.557303	0.586407	0.0734428	0.174661	0.76595	0.870675	no		1.05222
AGTPBP1	AGTPBP1	AGTPBP1	chr9:88161453-88356944	OK	3.77598	3.57115	-0.0804631	-0.505947	0.38025	0.55921	no		0.945754
AGTR1	AGTR1	AGTR1	chr3:148415657-148460790	NOTEST	0	0	0	0	1	1	no		1
AGTR2	AGTR2	AGTR2	chrX:115301957-115306225	NOTEST	0	0	0	0	1	1	no		1
AGTRAP	AGTRAP	AGTRAP	chr1:11796141-11810828	OK	58.1985	56.2125	-0.0500919	-0.41644	0.4633	0.634191	no		0.965875
AGXT	AGXT	AGXT	chr2:241808161-241818536	NOTEST	0	0	0	0	1	1	no		1
AGXT2	AGXT2	AGXT2	chr5:34998205-35048240	NOTEST	0	0	0	0	1	1	no		1
AHCTF1	AHCTF1	AHCTF1	chr1:247002401-247094726	OK	16.2463	20.2708	0.319293	2.2024	0.0002	0.00128915	yes		1.24772
AHCTF1P1	AHCTF1P1	AHCTF1P1	chr2:162355577-162364413	NOTEST	0.034191	0.0472484	0.466649	0	1	1	no		1.3819
AHCY	AHCY	AHCY	chr20:32868070-32899608	OK	227.692	246.998	0.11742	0.827988	0.1496	0.293737	no		1.08479
AHCYL1	AHCYL1	AHCYL1	chr1:110527386-110566364	OK	34.0948	31.7596	-0.102358	-0.700939	0.217	0.381833	no		0.931509
AHCYL2	AHCYL2	AHCYL2	chr7:128864854-129070052	OK	5.14748	5.18165	0.00954539	0.0680715	0.90555	0.949746	no		1.00664
AHDC1	AHDC1	AHDC1	chr1:27860755-27930005	OK	5.14484	5.9129	0.20074	1.53365	0.00755	0.0285128	yes		1.14929
AHI1	AHI1	AHI1	chr6:135605109-135818903	OK	4.35077	3.87646	-0.166533	-1.0745	0.0605	0.149457	no		0.890981
AHNAK	AHNAK	AHNAK	chr11:62201013-62314332	OK	127.746	114.223	-0.161431	-0.952391	0.05835	0.145594	no		0.894138
AHNAK2	AHNAK2	AHNAK2	chr14:105403590-105444694	OK	68.7068	60.6129	-0.180828	-1.28017	0.02675	0.0793745	no		0.882197
AHR	AHR	AHR	chr7:17338275-17385775	OK	4.75479	4.11921	-0.207012	-1.50523	0.0094	0.0341796	yes		0.86633
AHRR	AHRR	AHRR	chr5:271735-438405	OK	1.02106	0.726784	-0.490473	-1.00448	0.08005	0.184335	no		0.711792
AHSA1	AHSA1	AHSA1	chr14:77924372-77935815	OK	133.28	150.412	0.174454	1.20847	0.0355	0.0991557	no		1.12854
AHSA2	AHSA2	AHSA2	chr2:61404554-61697849	OK	19.4261	21.8798	0.171603	0.564391	0.3265	0.507694	no		1.12631
AHSG	AHSG	AHSG	chr3:186330849-186339107	NOTEST	0	0	0	0	1	1	no		1
AHSP	AHSP	AHSP	chr16:31539202-31540124	NOTEST	0	0	0	0	1	1	no		1
AICDA	AICDA	AICDA	chr12:8754761-8765442	NOTEST	0	0	0	0	1	1	no		1
AIDA	AIDA	AIDA	chr1:222841354-222885864	OK	33.9867	29.7613	-0.191536	-1.44715	0.0131	0.0448251	yes		0.875673
AIF1	AIF1	AIF1	chr6_ssto_hap7:2913800-2915605	NOTEST	0.163286	0	#NAME?	0	1	1	no		#NAME?
AIF1L	AIF1L	AIF1L	chr9:133971862-133998539	OK	5.47597	3.75815	-0.543093	-3.368	5e-05	0.000373901	yes		0.686298
AIFM1	AIFM1	AIFM1	chrX:129263337-129299861	OK	28.2837	29.8249	0.076546	0.641481	0.26395	0.438774	no		1.05449
AIFM2	AIFM2	AIFM2	chr10:71812356-71892690	OK	8.24803	6.3613	-0.374729	-2.61563	5e-05	0.000373901	yes		0.77125
AIFM3	AIFM3	AIFM3	chr22:21319417-21335649	NOTEST	0.0165359	0.0497458	1.58897	0	1	1	no		3.00834
AIG1	AIG1	AIG1	chr6:143380499-143661480	OK	13.5888	11.125	-0.288619	-1.76169	0.00195	0.00926231	yes		0.818685
AIM1	AIM1	AIM1	chr6:106959729-107018324	OK	0.982622	0.977538	-0.00748422	-0.0364179	0.9453	0.971823	no		0.994826
AIM1L	AIM1L	AIM1L	chr1:26648349-26680621	NOTEST	0.0137708	0.0119724	-0.201895	0	1	1	no		0.869408
AIM2	AIM2	AIM2	chr1:159032274-159046647	NOTEST	0	0.0291079	inf	0	1	1	no		#VALUE!
AIMP1	AIMP1	AIMP1	chr4:106965473-107270381	OK	17.1801	16.7263	-0.0386251	-0.238621	0.67945	0.808686	no		0.973582
AIMP2	AIMP2	AIMP2	chr7:6048881-6098860	OK	18.741	19.6882	0.0711292	0.165584	0.77375	0.876014	no		1.05054
AIP	AIP	AIP	chr11:67250499-67258579	OK	56.943	47.6434	-0.25724	-2.13611	0.0002	0.00128915	yes		0.836687
AIPL1	AIPL1	AIPL1	chr17:6327056-6338519	NOTEST	0.00708326	0.00580861	-0.28622	0	1	1	no		0.820048
AIRE	AIRE	AIRE	chr21:45705720-45718102	NOTEST	0	0	0	0	1	1	no		1
AIRN	AIRN	AIRN	chr6:160390130-160527583	NOTEST	0	0.00882484	inf	0	1	1	no		#VALUE!
AJAP1	AJAP1	AJAP1	chr1:4715104-4843851	NOTEST	0.0277629	0	#NAME?	0	1	1	no		#NAME?
AJUBA	AJUBA	AJUBA	chr14:23440382-23451851	OK	22.0746	22.9729	0.0575484	0.468901	0.41555	0.591039	no		1.0407
AK1	AK1	AK1	chr9:130628758-130640022	OK	38.3907	39.6947	0.0481904	0.418083	0.45715	0.628613	no		1.03397
AK2	AK2	AK2	chr1:33473540-33502512	OK	38.3729	35.9185	-0.0953605	-0.645554	0.2583	0.432668	no		0.936038
AK3	AK3	AK3	chr9:4709556-4742043	OK	15.3499	15.1668	-0.0173139	-0.145677	0.7982	0.889108	no		0.988071
AK4	AK4	AK4	chr1:65613231-65697828	NOTEST	0.0811863	0.122049	0.588153	0	1	1	no		1.50332
AK5	AK5	AK5	chr1:77747661-78025654	NOTEST	0	0.00726912	inf	0	1	1	no		#VALUE!
AK6	AK6	AK6	chr5:68647552-68710630	OK	22.5481	18.7136	-0.268919	-0.728386	0.1958	0.355456	no		0.829941
AK7	AK7	AK7	chr14:96858447-96955764	NOTEST	0.0166216	0.0195119	0.231294	0	1	1	no		1.17389
AK8	AK8	AK8	chr9:135600964-135754198	NOTEST	0.0451928	0.0668883	0.565662	0	1	1	no		1.48007
AK9	AK9	AK9	chr6:109814058-110012415	OK	1.38871	1.07367	-0.371196	-1.16293	0.0432	0.115321	no		0.773141
AKAP1	AKAP1	AKAP1	chr17:55162552-55198710	OK	20.0835	18.9203	-0.0860721	-0.741317	0.19715	0.356656	no		0.942084
AKAP10	AKAP10	AKAP10	chr17:19807764-19881169	OK	9.29549	9.35367	0.00900174	0.0692332	0.90075	0.948448	no		1.00626
AKAP11	AKAP11	AKAP11	chr13:42846288-42897403	OK	8.53119	8.7059	0.0292473	0.254596	0.65375	0.788448	no		1.02048
AKAP12	AKAP12	AKAP12	chr6:151561133-151679694	OK	102.63	94.8717	-0.113404	-0.800089	0.16585	0.316003	no		0.924404
AKAP13	AKAP13	AKAP13	chr15:85923826-86292589	OK	8.79182	9.46234	0.106035	0.702142	0.21625	0.380783	no		1.07627
AKAP14	AKAP14	AKAP14	chrX:119029935-119054679	NOTEST	0	0.0515688	inf	0	1	1	no		#VALUE!
AKAP17A	AKAP17A	AKAP17A	chrY:1660485-1711974	OK	7.96076	9.8168	0.302347	2.18876	0.00025	0.00156594	yes		1.23315
AKAP2	AKAP2	AKAP2	chr9:112403067-112934791	OK	51.5496	80.7193	0.646953	4.58607	5e-05	0.000373901	yes		1.56586
AKAP3	AKAP3	AKAP3	chr12:4724673-4758213	NOTEST	0.339807	0.342812	0.0127016	0	1	1	no		1.00884
AKAP4	AKAP4	AKAP4	chrX:49955410-49965664	NOTEST	0.01978	0	#NAME?	0	1	1	no		#NAME?
AKAP5	AKAP5	AKAP5	chr14:64319682-65007086	NOTEST	0.0810923	0.13008	0.681762	0	1	1	no		1.6041
AKAP6	AKAP6	AKAP6	chr14:32798478-33302268	NOTEST	0.457844	0.423559	-0.112292	0	1	1	no		0.925117
AKAP7	AKAP7	AKAP7	chr6:131456825-131604675	OK	0.571032	0.332191	-0.781556	-1.62989	0.00495	0.0202316	yes		0.581739
AKAP8	AKAP8	AKAP8	chr19:15464331-15490612	OK	12.8753	15.0083	0.221147	1.7849	0.0022	0.0102422	yes		1.16566
AKAP8L	AKAP8L	AKAP8L	chr19:15490858-15529932	OK	29.9319	32.21	0.105824	0.890371	0.11945	0.249443	no		1.07611
AKAP9	AKAP9	AKAP9	chr7:91570188-91739987	OK	3.68751	4.14329	0.168132	1.37393	0.01625	0.0535104	no		1.1236
AKIP1	AKIP1	AKIP1	chr11:8932700-8954553	OK	11.441	13.2327	0.209894	1.2699	0.02885	0.0841978	no		1.1566
AKIRIN1	AKIRIN1	AKIRIN1	chr1:39456915-39471737	OK	35.3657	18.2972	-0.950731	-7.96731	5e-05	0.000373901	yes		0.51737
AKIRIN2	AKIRIN2	AKIRIN2	chr6:88384577-88411985	OK	17.262	19.5014	0.17598	1.32979	0.0215	0.0668632	no		1.12973
AKNA	AKNA	AKNA	chr9:117096432-117156685	OK	0.744215	0.546143	-0.44644	-1.80719	0.00185	0.00885846	yes		0.733851
AKNAD1	AKNAD1	AKNAD1	chr1:109358519-109401146	NOTEST	0.224671	0.123374	-0.864778	0	1	1	no		0.549131
AKR1A1	AKR1A1	AKR1A1	chr1:46016454-46035723	OK	57.4611	62.6121	0.123856	1.0598	0.0654	0.158442	no		1.08964
AKR1B1	AKR1B1	AKR1B1	chr7:134127106-134143888	OK	2330.69	2368.98	0.0235087	0.164859	0.7758	0.877215	no		1.01643
AKR1B10	AKR1B10	AKR1B10	chr7:134212343-134226166	OK	4.50507	3.98017	-0.178717	-0.809906	0.1609	0.309323	no		0.883488
AKR1B15	AKR1B15	AKR1B15	chr7:134233848-134264592	NOTEST	0	0.0127802	inf	0	1	1	no		#VALUE!
AKR1C1	AKR1C1	AKR1C1	chr10:5005453-5020158	OK	0.894877	0.88607	-0.0142679	-0.0307756	0.964	0.98162	no		0.990159
AKR1C2	AKR1C2	AKR1C2	chr10:5029967-5060225	OK	1.32422	1.6257	0.295914	0.757472	0.17805	0.333267	no		1.22766
AKR1C3	AKR1C3	AKR1C3	chr10:5090957-5149878	OK	9.80226	9.79525	-0.00103091	-0.0056773	0.99175	0.995276	no		0.999286
AKR1C4	AKR1C4	AKR1C4	chr10:5238797-5260910	NOTEST	0	0.0407713	inf	0	1	1	no		#VALUE!
AKR1C6P	AKR1C6P	AKR1C6P	chr10:4913858-4958465	NOTEST	0	0.0151656	inf	0	1	1	no		#VALUE!
AKR1C8P	AKR1C8P	AKR1C8P	chr10:5196654-5227150	NOTEST	0.00948577	0	#NAME?	0	1	1	no		#NAME?
AKR1D1	AKR1D1	AKR1D1	chr7:137761177-137803050	NOTEST	0.00766972	0	#NAME?	0	1	1	no		#NAME?
AKR1E2	AKR1E2	AKR1E2	chr10:4868368-4890251	OK	3.96214	3.6296	-0.126471	-0.511327	0.35365	0.534976	no		0.91607
AKR7A2	AKR7A2	AKR7A2	chr1:19629201-19638640	OK	19.7867	18.7975	-0.0739886	-0.59889	0.29685	0.474968	no		0.950008
AKR7A2P1	AKR7A2P1	AKR7A2P1	chr1:113454469-113498975	NOTEST	0.106324	0.0454732	-1.22538	0	1	1	no		0.427685
AKR7A3	AKR7A3	AKR7A3	chr1:19609056-19615280	NOTEST	0.24915	0.369723	0.56943	0	1	1	no		1.48394
AKR7L	AKR7L	AKR7L	chr1:19592475-19600568	NOTEST	0.109699	0.25856	1.23696	0	1	1	no		2.35701
AKT1	AKT1	AKT1	chr14:105235686-105262080	OK	93.0255	104.084	0.162046	1.12872	0.04605	0.121184	no		1.11887
AKT1S1	AKT1S1	AKT1S1	chr19:50372289-50392007	OK	84.6507	97.1593	0.198831	1.17754	0.04105	0.110916	no		1.14777
AKT2	AKT2	AKT2	chr19:40736223-40791302	OK	23.5572	24.0533	0.0300648	0.205658	0.719	0.836208	no		1.02106
AKT3	AKT3	AKT3	chr1:243419306-244006886	OK	17.3299	20.6395	0.252143	1.18337	0.03895	0.106563	no		1.19097
AKTIP	AKTIP	AKTIP	chr16:53468350-53537216	OK	10.6467	8.93628	-0.252662	-0.929201	0.10175	0.220796	no		0.839346
ALAD	ALAD	ALAD	chr9:116148591-116163618	OK	16.5233	15.0759	-0.132253	-1.07137	0.06415	0.156329	no		0.912405
ALAS1	ALAS1	ALAS1	chr3:52232098-52248343	OK	30.9206	29.5805	-0.0639218	-0.539644	0.33935	0.521796	no		0.95666
ALAS2	ALAS2	ALAS2	chrX:55035487-55057497	NOTEST	0	0.0131577	inf	0	1	1	no		#VALUE!
ALB	ALB	ALB	chr4:74269971-74287129	NOTEST	0	0.00732555	inf	0	1	1	no		#VALUE!
ALCAM	ALCAM	ALCAM	chr3:105085556-105295757	OK	295.634	386.061	0.385017	2.6934	5e-05	0.000373901	yes		1.30588
ALDH16A1	ALDH16A1	ALDH16A1	chr19:49956472-49974305	OK	9.31991	12.3214	0.402778	3.05002	5e-05	0.000373901	yes		1.32205
ALDH18A1	ALDH18A1	ALDH18A1	chr10:97365685-97416567	OK	25.1892	21.3117	-0.241157	-2.06956	0.0004	0.00236141	yes		0.846067
ALDH1A1	ALDH1A1	ALDH1A1	chr9:75515577-75568233	OK	22.9586	24.458	0.0912722	0.749593	0.1879	0.345764	no		1.06531
ALDH1A2	ALDH1A2	ALDH1A2	chr15:58245621-58358121	NOTEST	0	0	0	0	1	1	no		1
ALDH1A3	ALDH1A3	ALDH1A3	chr15:101419896-101456830	OK	1.3011	1.01657	-0.35602	-1.26441	0.02	0.0632756	no		0.781317
ALDH1B1	ALDH1B1	ALDH1B1	chr9:38392660-38398662	OK	9.08087	8.42975	-0.107341	-0.7703	0.1836	0.340678	no		0.928297
ALDH1L1	ALDH1L1	ALDH1L1	chr3:125822403-125929011	OK	0.751142	1.00077	0.413952	1.21228	0.02135	0.0664966	no		1.33233
ALDH1L1-AS1	ALDH1L1-AS1	ALDH1L1-AS1	chr3:125822403-125929011	NOTEST	0	0	0	0	1	1	no		1
ALDH1L1-AS2	ALDH1L1-AS2	ALDH1L1-AS2	chr3:125822403-125929011	NOTEST	0.00806728	0	#NAME?	0	1	1	no		#NAME?
ALDH1L2	ALDH1L2	ALDH1L2	chr12:105413561-105478341	OK	1.73969	2.16737	0.317114	1.94216	0.0004	0.00236141	yes		1.24584
ALDH2	ALDH2	ALDH2	chr12:112204690-112247789	NOTEST	0.0580689	0.0426263	-0.44602	0	1	1	no		0.734065
ALDH3A1	ALDH3A1	ALDH3A1	chr17:19641297-19651746	NOTEST	0.176289	0.18652	0.0813873	0	1	1	no		1.05803
ALDH3A2	ALDH3A2	ALDH3A2	chr17:19552063-19580908	OK	54.8672	64.6494	0.236691	1.64934	0.0045	0.0187001	yes		1.17829
ALDH3B1	ALDH3B1	ALDH3B1	chr11:67776016-67796749	OK	11.3571	8.6034	-0.400616	-2.85011	5e-05	0.000373901	yes		0.757535
ALDH3B2	ALDH3B2	ALDH3B2	chr11:67429632-67448685	NOTEST	0	0	0	0	1	1	no		1
ALDH4A1	ALDH4A1	ALDH4A1	chr1:19197923-19229293	OK	9.96778	9.8321	-0.0197735	-0.146407	0.7962	0.887995	no		0.986388
ALDH5A1	ALDH5A1	ALDH5A1	chr6:24495196-24537435	NOTEST	0.0676573	0.0500833	-0.433915	0	1	1	no		0.74025
ALDH6A1	ALDH6A1	ALDH6A1	chr14:74486058-74551196	OK	4.37466	4.37236	-0.000759576	-0.00485865	0.9938	0.996065	no		0.999474
ALDH7A1	ALDH7A1	ALDH7A1	chr5:125877532-125931082	OK	18.7074	27.4459	0.552983	4.21592	5e-05	0.000373901	yes		1.46712
ALDH8A1	ALDH8A1	ALDH8A1	chr6:135238527-135271260	NOTEST	0.00831812	0.058809	2.82171	0	1	1	no		7.07
ALDH9A1	ALDH9A1	ALDH9A1	chr1:165631448-165667900	OK	38.0471	34.1809	-0.154595	-1.34543	0.01765	0.0572404	no		0.898385
ALDOA	ALDOA	ALDOA	chr16:30064410-30081741	OK	967.901	818.379	-0.24209	-1.71059	0.0028	0.012551	yes		0.84552
ALDOB	ALDOB	ALDOB	chr9:104182841-104198062	NOTEST	0	0.0134856	inf	0	1	1	no		#VALUE!
ALDOC	ALDOC	ALDOC	chr17:26900132-26903951	NOTEST	0.145244	0.23	0.663154	0	1	1	no		1.58354
ALG1	ALG1	ALG1	chr16:5121809-5147821	OK	10.14	10.7728	0.0873339	0.540102	0.3527	0.534189	no		1.06241
ALG10	ALG10	ALG10	chr12:34175215-34181236	OK	1.7957	1.6758	-0.099699	-0.423384	0.463	0.63385	no		0.933228
ALG10B	ALG10B	ALG10B	chr12:38710556-38723528	OK	0.809325	0.889984	0.137061	0.703484	0.221	0.386734	no		1.09966
ALG11	ALG11	ALG11	chr13:52586522-52607736	OK	3.67499	3.97807	0.114326	0.452678	0.4252	0.599819	no		1.08247
ALG12	ALG12	ALG12	chr22:50296853-50312106	OK	18.1942	17.1387	-0.0862186	-0.675157	0.23725	0.407647	no		0.941989
ALG13	ALG13	ALG13	chrX:110924345-111003875	OK	17.8274	19.2541	0.111063	0.93442	0.10095	0.219482	no		1.08002
ALG14	ALG14	ALG14	chr1:95448278-95538507	OK	4.75522	3.73416	-0.348728	-1.26989	0.0256	0.0767506	no		0.785276
ALG1L	ALG1L	ALG1L	chr3:125635443-125655887	NOTEST	0.219668	0.387833	0.820112	0	1	1	no		1.76554
ALG1L2	ALG1L2	ALG1L2	chr3:129800673-129830276	NOTEST	0	0	0	0	1	1	no		1
ALG1L9P	ALG1L9P	ALG1L9P	chr11:71498556-71524905	NOTEST	0.0871274	0.010744	-3.01959	0	1	1	no		0.123314
ALG2	ALG2	ALG2	chr9:101978706-101984246	OK	16.2566	16.934	0.0589007	0.471986	0.4151	0.590805	no		1.04167
ALG3	ALG3	ALG3	chr3:183948316-183967313	OK	42.491	43.5176	0.0344423	0.285409	0.62495	0.768717	no		1.02416
ALG5	ALG5	ALG5	chr13:37523907-37573504	OK	15.0993	15.8934	0.0739459	0.471551	0.40815	0.584606	no		1.05259
ALG6	ALG6	ALG6	chr1:63833260-63904233	OK	4.84318	4.18591	-0.210412	-1.2977	0.02355	0.0719062	no		0.86429
ALG8	ALG8	ALG8	chr11:77726760-77850699	OK	39.364	39.2056	-0.00581794	-0.0262561	0.96315	0.98116	no		0.995975
ALG9	ALG9	ALG9	chr11:111652918-111742305	OK	5.1893	5.11113	-0.0218957	-0.164324	0.77515	0.87688	no		0.984938
ALK	ALK	ALK	chr2:29415639-30144477	NOTEST	0.00303688	0.0123351	2.02211	0	1	1	no		4.06177
ALKBH1	ALKBH1	ALKBH1	chr14:78138748-78174356	OK	8.19738	8.0193	-0.0316879	-0.213219	0.71685	0.834645	no		0.978275
ALKBH2	ALKBH2	ALKBH2	chr12:109525992-109531293	OK	13.3473	14.1894	0.0882675	0.496716	0.3873	0.564697	no		1.06309
ALKBH3	ALKBH3	ALKBH3	chr11:43902356-43942494	OK	12.7214	11.1586	-0.189102	-1.19378	0.0348	0.0976176	no		0.877152
ALKBH3-AS1	ALKBH3-AS1	ALKBH3-AS1	chr11:43902356-43942494	NOTEST	0.0197933	0.0217412	0.135424	0	1	1	no		1.09842
ALKBH4	ALKBH4	ALKBH4	chr7:102073976-102105321	OK	5.02728	4.02953	-0.319167	-0.502074	0.37555	0.554794	no		0.801533
ALKBH5	ALKBH5	ALKBH5	chr17:18086866-18113267	OK	15.7644	18.1329	0.201938	1.67244	0.004	0.0169397	yes		1.15024
ALKBH6	ALKBH6	ALKBH6	chr19:36500017-36505145	OK	10.0268	9.00233	-0.15549	-0.774176	0.17615	0.330507	no		0.897827
ALKBH7	ALKBH7	ALKBH7	chr19:6372443-6375261	OK	17.6813	21.918	0.309897	2.16329	0.0002	0.00128915	yes		1.23962
ALKBH8	ALKBH8	ALKBH8	chr11:107373452-107436461	OK	3.72171	3.38417	-0.137163	-0.83916	0.1432	0.285046	no		0.909306
ALLC	ALLC	ALLC	chr2:3705785-3750260	NOTEST	0	0	0	0	1	1	no		1
ALMS1	ALMS1	ALMS1	chr2:73612885-73837046	OK	1.90882	1.91558	0.00510013	0.0361107	0.95455	0.976308	no		1.00354
ALMS1-IT1	ALMS1-IT1	ALMS1-IT1	chr2:73612885-73837046	NOTEST	0.189823	0.146227	-0.376444	0	1	1	no		0.770334
ALMS1P	ALMS1P	ALMS1P	chr2:73872045-73912694	NOTEST	0	0.0630254	inf	0	1	1	no		#VALUE!
ALOX12	ALOX12	ALOX12	chr17:6888441-6915653	NOTEST	0.0986498	0.213357	1.11288	0	1	1	no		2.16277
ALOX12-AS1	ALOX12-AS1	ALOX12-AS1	chr17:6888441-6915653	OK	1.90617	2.53529	0.411476	0.801557	0.1535	0.299031	no		1.33005
ALOX12B	ALOX12B	ALOX12B	chr17:7975953-7991021	NOTEST	0.0459493	0.0144852	-1.66546	0	1	1	no		0.315244
ALOX12P2	ALOX12P2	ALOX12P2	chr17:6756894-6803668	NOTEST	0.00835217	0.0112286	0.42696	0	1	1	no		1.3444
ALOX15	ALOX15	ALOX15	chr17:4534213-4544960	NOTEST	0.00678745	0.0212267	1.64494	0	1	1	no		3.12735
ALOX15B	ALOX15B	ALOX15B	chr17:7942357-7952451	OK	0.422214	0.772408	0.871388	1.64046	0.0006	0.00337069	yes		1.82942
ALOX15P1	ALOX15P1	ALOX15P1	chr17:6561037-6564701	NOTEST	0	0	0	0	1	1	no		1
ALOX5	ALOX5	ALOX5	chr10:45869623-45948569	NOTEST	0.0157918	0.0103379	-0.611231	0	1	1	no		0.654638
ALOX5AP	ALOX5AP	ALOX5AP	chr13:31287614-31338565	OK	30.2879	60.6489	1.00174	7.41876	5e-05	0.000373901	yes		2.00241
ALOXE3	ALOXE3	ALOXE3	chr17:7999217-8022234	OK	0.787759	0.503992	-0.644355	-1.75371	0.0019	0.00905946	yes		0.639779
ALPI	ALPI	ALPI	chr2:233320821-233325455	NOTEST	0	0	0	0	1	1	no		1
ALPK1	ALPK1	ALPK1	chr4:113218498-113363764	OK	3.56387	3.5658	0.000783151	0.00519751	0.99295	0.995796	no		1.00054
ALPK2	ALPK2	ALPK2	chr18:56148481-56296189	NOTEST	0.00238652	0.00425947	0.835769	0	1	1	no		1.78481
ALPK3	ALPK3	ALPK3	chr15:85359910-85416713	NOTEST	0.146819	0.199894	0.445199	0	1	1	no		1.3615
ALPL	ALPL	ALPL	chr1:21835857-21904905	NOTEST	0.0409003	0.120131	1.55442	0	1	1	no		2.93716
ALPP	ALPP	ALPP	chr2:233243243-233247599	NOTEST	0	0	0	0	1	1	no		1
ALPPL2	ALPPL2	ALPPL2	chr2:233271551-233275424	NOTEST	0.00747095	0	#NAME?	0	1	1	no		#NAME?
ALS2	ALS2	ALS2	chr2:202564985-202645895	OK	9.13066	7.81388	-0.224681	-1.69761	0.00255	0.0115724	yes		0.855784
ALS2CL	ALS2CL	ALS2CL	chr3:46710484-46735194	OK	5.36442	2.98814	-0.844173	-5.38317	5e-05	0.000373901	yes		0.55703
ALS2CR11	ALS2CR11	ALS2CR11	chr2:202352143-202483905	NOTEST	0.0160717	0.0350658	1.12554	0	1	1	no		2.18183
ALS2CR12	ALS2CR12	ALS2CR12	chr2:202152993-202222121	NOTEST	0.182052	0.236585	0.378007	0	1	1	no		1.29955
ALX1	ALX1	ALX1	chr12:85674035-85695561	OK	1.55627	1.52939	-0.0251351	-0.0668811	0.91405	0.95447	no		0.982729
ALX3	ALX3	ALX3	chr1:110602996-110613322	OK	1.10819	0.902879	-0.295601	-0.694812	0.22665	0.393847	no		0.814733
ALX4	ALX4	ALX4	chr11:44282277-44331716	NOTEST	0.0204677	0.0212015	0.050819	0	1	1	no		1.03585
ALYREF	ALYREF	ALYREF	chr17:79845710-79858409	OK	35.7504	40.0197	0.162751	0.951457	0.0995	0.217433	no		1.11942
AMACR	AMACR	AMACR	chr5:33987090-34124633	OK	3.25357	3.95987	0.283426	1.59822	0.00425	0.0178282	yes		1.21708
AMBN	AMBN	AMBN	chr4:71457974-71473004	NOTEST	0	0	0	0	1	1	no		1
AMBP	AMBP	AMBP	chr9:116822407-116840752	NOTEST	0.151579	0.430152	1.50478	0	1	1	no		2.83781
AMBRA1	AMBRA1	AMBRA1	chr11:46417961-46615619	OK	10.4946	10.5356	0.00562063	0.046024	0.93355	0.964694	no		1.0039
AMD1	AMD1	AMD1	chr6:110931180-111216915	OK	27.3334	27.4899	0.00823614	0.048319	0.93425	0.964925	no		1.00573
AMDHD1	AMDHD1	AMDHD1	chr12:96337070-96362370	NOTEST	0.333852	0.337527	0.0157918	0	1	1	no		1.01101
AMDHD2	AMDHD2	AMDHD2	chr16:2570362-2581409	OK	18.8415	16.4798	-0.193215	-1.10513	0.05345	0.13574	no		0.874654
AMELX	AMELX	AMELX	chrX:11155662-11683821	NOTEST	0	0	0	0	1	1	no		1
AMELY	AMELY	AMELY	chrY:6733958-6742068	NOTEST	0	0	0	0	1	1	no		1
AMER1	AMER1	AMER1	chrX:63404996-63425624	OK	1.91984	1.44807	-0.406862	-2.47511	5e-05	0.000373901	yes		0.754262
AMER2	AMER2	AMER2	chr13:25735816-25746421	NOTEST	0	0	0	0	1	1	no		1
AMER3	AMER3	AMER3	chr2:131513076-131525707	NOTEST	0	0	0	0	1	1	no		1
AMFR	AMFR	AMFR	chr16:56395363-56459450	OK	45.9685	39.98	-0.201367	-1.38617	0.0153	0.0509085	no		0.869726
AMH	AMH	AMH	chr19:2249112-2252072	OK	3.28402	4.66807	0.507362	2.45659	5e-05	0.000373901	yes		1.42145
AMHR2	AMHR2	AMHR2	chr12:53817638-53825318	NOTEST	0	0	0	0	1	1	no		1
AMICA1	AMICA1	AMICA1	chr11:118064441-118095809	NOTEST	0	0	0	0	1	1	no		1
AMIGO1	AMIGO1	AMIGO1	chr1:110049445-110052336	NOTEST	0.0236709	0	#NAME?	0	1	1	no		#NAME?
AMIGO2	AMIGO2	AMIGO2	chr12:47469489-47630446	OK	3.17796	3.1037	-0.0341125	-0.176113	0.7609	0.866838	no		0.976632
AMIGO3	AMIGO3	AMIGO3	chr3:49726949-49761407	OK	2.32437	2.86205	0.300211	0.711105	0.21265	0.376204	no		1.23132
AMMECR1	AMMECR1	AMMECR1	chrX:109437413-109699562	OK	6.89438	5.24393	-0.394773	-2.94242	5e-05	0.000373901	yes		0.760609
AMMECR1L	AMMECR1L	AMMECR1L	chr2:128619206-128643514	OK	9.39025	8.97166	-0.0657894	-0.52095	0.36375	0.543699	no		0.955422
AMN	AMN	AMN	chr14:103388992-103397179	NOTEST	0	0.0568112	inf	0	1	1	no		#VALUE!
AMN1	AMN1	AMN1	chr12:31824070-31882108	OK	7.13508	7.48259	0.0686081	0.419253	0.4642	0.635073	no		1.0487
AMOT	AMOT	AMOT	chrX:112018104-112084043	NOTEST	0.0448718	0.0566476	0.336204	0	1	1	no		1.26243
AMOTL1	AMOTL1	AMOTL1	chr11:94501507-94609918	OK	11.5528	9.65822	-0.258412	-1.94932	0.001	0.00523872	yes		0.836008
AMOTL2	AMOTL2	AMOTL2	chr3:134074186-134094259	OK	9.86479	8.26028	-0.256098	-2.0409	0.00025	0.00156594	yes		0.83735
AMPD1	AMPD1	AMPD1	chr1:115215719-115238239	NOTEST	0	0	0	0	1	1	no		1
AMPD2	AMPD2	AMPD2	chr1:110162434-110174677	OK	22.2898	21.5467	-0.0489205	-0.421477	0.4562	0.627724	no		0.966659
AMPD3	AMPD3	AMPD3	chr11:10471867-10529126	OK	0.762194	0.574132	-0.408778	-1.15487	0.01995	0.0631496	no		0.753261
AMPH	AMPH	AMPH	chr7:38423296-38671167	NOTEST	0.00591987	0	#NAME?	0	1	1	no		#NAME?
AMT	AMT	AMT	chr3:49454210-49466757	OK	2.44222	3.07451	0.332167	0.993945	0.07785	0.180709	no		1.2589
AMTN	AMTN	AMTN	chr4:71384288-71398460	OK	0.890116	1.07497	0.272238	0.449283	0.38585	0.563575	no		1.20768
AMY1A	AMY1A,AMY1B,AMY1C	AMY1A,AMY1B,AMY1C	chr1:104292278-104301311	NOTEST	0	0	0	0	1	1	no		1
AMY1B	AMY1B	AMY1B	chr1:104292278-104301311	NOTEST	0	0	0	0	1	1	no		1
AMY1C	AMY1C	AMY1C	chr1:104292278-104301311	NOTEST	0	0	0	0	1	1	no		1
AMY2A	AMY2A	AMY2A	chr1:104159953-104168402	NOTEST	0.0115347	0.0457092	1.9865	0	1	1	no		3.96274
AMY2B	AMY2B	AMY2B	chr1:104068577-104122156	OK	3.0329	3.20054	0.0776203	0.22043	0.70055	0.824555	no		1.05528
AMZ1	AMZ1	AMZ1	chr7:2719155-2755070	NOTEST	0.0269966	0.00921012	-1.55149	0	1	1	no		0.341158
AMZ2	AMZ2	AMZ2	chr17:66244144-66253305	OK	76.9513	99.5119	0.370923	2.4519	5e-05	0.000373901	yes		1.29318
AMZ2P1	AMZ2P1	AMZ2P1	chr17:62962667-62971703	OK	2.94229	3.19589	0.11928	0.654536	0.2471	0.418722	no		1.08619
ANAPC1	ANAPC1	ANAPC1	chr2:112525213-112641741	OK	7.57692	7.22379	-0.0688568	-0.571612	0.31455	0.495062	no		0.953393
ANAPC10	ANAPC10	ANAPC10	chr4:145915726-146050676	OK	5.54725	4.71842	-0.23347	-0.322691	0.5828	0.736041	no		0.850587
ANAPC11	ANAPC11	ANAPC11	chr17:79845710-79858409	OK	42.5321	40.4443	-0.0726154	-0.388814	0.5055	0.672538	no		0.950913
ANAPC13	ANAPC13	ANAPC13	chr3:134196545-134293855	OK	67.0277	73.2495	0.128061	0.766754	0.18455	0.341777	no		1.09282
ANAPC15	ANAPC15	ANAPC15	chr11:71709957-71823822	OK	21.4378	23.7662	0.148757	0.182223	0.7753	0.876969	no		1.10861
ANAPC16	ANAPC16	ANAPC16	chr10:73855789-73995618	OK	24.0061	29.1665	0.28091	1.58017	0.00645	0.025281	yes		1.21496
ANAPC1P1	ANAPC1P1	ANAPC1P1	chr2:87042459-87122165	NOTEST	0.0213691	0.0382254	0.839005	0	1	1	no		1.78882
ANAPC2	ANAPC2	ANAPC2	chr9:140069235-140084822	OK	23.5842	22.2319	-0.0851894	-0.409559	0.47605	0.646443	no		0.942661
ANAPC4	ANAPC4	ANAPC4	chr4:25378847-25420120	OK	7.51254	6.59016	-0.188987	-1.23681	0.031	0.089339	no		0.877221
ANAPC5	ANAPC5	ANAPC5	chr12:121746047-121792012	OK	63.09	64.5807	0.03369	0.231417	0.6859	0.812625	no		1.02363
ANAPC7	ANAPC7	ANAPC7	chr12:110810704-110841535	OK	29.6831	30.127	0.0214174	0.181362	0.75175	0.859885	no		1.01496
ANG	ANG	ANG	chr14:21152335-21168761	OK	3.04246	2.12007	-0.521125	-0.928737	0.1094	0.23332	no		0.696828
ANGEL1	ANGEL1	ANGEL1	chr14:77253585-77279283	OK	10.0569	9.04987	-0.152223	-1.18459	0.03675	0.101846	no		0.899863
ANGEL2	ANGEL2	ANGEL2	chr1:213165523-213189217	OK	5.28509	4.05971	-0.380554	-2.59117	5e-05	0.000373901	yes		0.768143
ANGPT1	ANGPT1	ANGPT1	chr8:108261709-108510254	OK	2.68226	3.69424	0.461828	2.76476	5e-05	0.000373901	yes		1.37729
ANGPT2	ANGPT2	ANGPT2	chr8:6264112-6565730	NOTEST	0.0714452	0.0860034	0.267555	0	1	1	no		1.20377
ANGPT4	ANGPT4	ANGPT4	chr20:853296-896960	NOTEST	0.275243	0.384131	0.480891	0	1	1	no		1.39561
ANGPTL1	ANGPTL1	ANGPTL1	chr1:178694281-178890977	NOTEST	0.00513553	0.0145004	1.4975	0	1	1	no		2.82353
ANGPTL2	ANGPTL2	ANGPTL2	chr9:129677052-129985445	OK	6.22743	6.97343	0.163232	0.938788	0.10115	0.219801	no		1.11979
ANGPTL3	ANGPTL3	ANGPTL3	chr1:62920396-63154039	NOTEST	0.0129052	0	#NAME?	0	1	1	no		#NAME?
ANGPTL4	ANGPTL4	ANGPTL4	chr19:8429010-8439259	OK	650.439	714.509	0.135538	0.924754	0.10015	0.218239	no		1.0985
ANGPTL5	ANGPTL5	ANGPTL5	chr11:101761404-101871796	NOTEST	0.0577449	0.0153706	-1.90952	0	1	1	no		0.266181
ANGPTL6	ANGPTL6	ANGPTL6	chr19:10196794-10213425	OK	4.77233	5.28427	0.14701	0.468817	0.41765	0.592872	no		1.10727
ANGPTL7	ANGPTL7	ANGPTL7	chr1:11166587-11322608	NOTEST	0	0	0	0	1	1	no		1
ANHX	ANHX	ANHX	chr12:133794897-133812422	NOTEST	0.01165	0	#NAME?	0	1	1	no		#NAME?
ANK1	ANK1	ANK1	chr8:41510743-41754280	NOTEST	0.0173469	0.0219359	0.338613	0	1	1	no		1.26454
ANK2	ANK2	ANK2	chr4:113739238-114304896	NOTEST	0.375801	0.527237	0.488485	0	1	1	no		1.40297
ANK3	ANK3	ANK3	chr10:61786055-62493284	OK	0.823642	0.654291	-0.332086	-1.49684	0.00965	0.0348235	yes		0.794387
ANKAR	ANKAR	ANKAR	chr2:190540710-190611376	NOTEST	0.144807	0.189625	0.389014	0	1	1	no		1.3095
ANKDD1A	ANKDD1A	ANKDD1A	chr15:65204100-65251041	OK	1.20311	1.4429	0.262213	0.993058	0.0837	0.190619	no		1.19932
ANKDD1B	ANKDD1B	ANKDD1B	chr5:74907300-74967671	NOTEST	0.0883414	0.0951489	0.107097	0	1	1	no		1.07706
ANKEF1	ANKEF1	ANKEF1	chr20:10004459-10288066	OK	1.65205	1.28179	-0.366099	-1.54598	0.00725	0.0276149	yes		0.775878
ANKFN1	ANKFN1	ANKFN1	chr17:54230835-54560007	OK	1.54413	1.5845	0.0372282	0.135444	0.81515	0.89872	no		1.02614
ANKFY1	ANKFY1	ANKFY1	chr17:4066664-4167274	OK	20.1093	19.1359	-0.0715801	-0.496201	0.3875	0.564856	no		0.951595
ANKH	ANKH	ANKH	chr5:14704908-14871887	OK	4.26285	3.58916	-0.248171	-1.7431	0.00255	0.0115724	yes		0.841963
ANKHD1	ANKHD1	ANKHD1	chr5:139781398-139929163	OK	16.3423	17.2891	0.0812506	0.318466	0.5767	0.731759	no		1.05793
ANKHD1-EIF4EBP3	ANKHD1-EIF4EBP3	ANKHD1-EIF4EBP3	chr5:139781398-139929163	OK	13.8487	13.695	-0.0160999	-0.0635587	0.908	0.95111	no		0.988902
ANKIB1	ANKIB1	ANKIB1	chr7:91875547-92030698	OK	14.3322	14.3965	0.00646644	0.0563488	0.92255	0.959365	no		1.00449
ANKK1	ANKK1	ANKK1	chr11:113258512-113271140	NOTEST	0.0446512	0.0794289	0.830966	0	1	1	no		1.77888
ANKLE1	ANKLE1	ANKLE1	chr19:17392453-17398455	NOTEST	0.321569	0.506776	0.65622	0	1	1	no		1.57595
ANKLE2	ANKLE2	ANKLE2	chr12:133302252-133338474	OK	15.2964	15.7532	0.0424613	0.360658	0.5233	0.687509	no		1.02987
ANKMY1	ANKMY1	ANKMY1	chr2:241418838-241503431	OK	2.13046	2.14265	0.00823474	0.0330231	0.9533	0.976089	no		1.00572
ANKMY2	ANKMY2	ANKMY2	chr7:16639400-16685442	OK	7.9396	7.41915	-0.0978132	-0.646757	0.2575	0.43175	no		0.934448
ANKRA2	ANKRA2	ANKRA2	chr5:72848024-72861511	OK	8.29191	9.86307	0.250331	1.65239	0.0045	0.0187001	yes		1.18948
ANKRD1	ANKRD1	ANKRD1	chr10:92671856-92681032	OK	69.3853	44.0896	-0.654194	-4.96796	5e-05	0.000373901	yes		0.63543
ANKRD10	ANKRD10	ANKRD10	chr13:111530886-111567454	OK	9.64998	10.6059	0.136264	0.85747	0.1363	0.275192	no		1.09906
ANKRD11	ANKRD11	ANKRD11	chr16:89334028-89556969	OK	33.8042	36.0137	0.0913469	0.563628	0.32715	0.508386	no		1.06536
ANKRD12	ANKRD12	ANKRD12	chr18:9136750-9285983	OK	5.65897	4.8809	-0.213392	-1.782	0.00205	0.0096451	yes		0.862507
ANKRD13A	ANKRD13A	ANKRD13A	chr12:110437234-110477235	OK	9.04995	8.56906	-0.0787739	-0.597821	0.29935	0.477798	no		0.946862
ANKRD13B	ANKRD13B	ANKRD13B	chr17:27920526-27948441	OK	17.5556	12.3387	-0.508743	-3.98239	5e-05	0.000373901	yes		0.702835
ANKRD13C	ANKRD13C	ANKRD13C	chr1:70724684-70820417	OK	4.89793	4.7185	-0.0538445	-0.389872	0.49455	0.662726	no		0.963366
ANKRD13D	ANKRD13D	ANKRD13D	chr11:67056761-67069955	OK	14.4847	12.2688	-0.239538	-1.72826	0.00245	0.0111798	yes		0.847017
ANKRD16	ANKRD16	ANKRD16	chr10:5903688-5979558	OK	1.89153	2.45911	0.378581	0.61174	0.28915	0.46613	no		1.30006
ANKRD17	ANKRD17	ANKRD17	chr4:73940501-74124502	OK	15.0118	15.1321	0.011514	0.0791294	0.8919	0.943235	no		1.00801
ANKRD18A	ANKRD18A	ANKRD18A	chr9:38571360-38620360	NOTEST	0.00485835	0	#NAME?	0	1	1	no		#NAME?
ANKRD18B	ANKRD18B	ANKRD18B	chr9:33524410-33573001	OK	0.564067	0.529158	-0.092168	-0.257803	0.6507	0.785914	no		0.938112
ANKRD18DP	ANKRD18DP	ANKRD18DP	chr3:197784403-197807542	NOTEST	0.00680413	0	#NAME?	0	1	1	no		#NAME?
ANKRD19P	ANKRD19P	ANKRD19P	chr9:95571892-95600739	NOTEST	0.0912195	0.0990986	0.119522	0	1	1	no		1.08637
ANKRD2	ANKRD2	ANKRD2	chr10:99332197-99343641	NOTEST	0.110139	0.150425	0.449717	0	1	1	no		1.36577
ANKRD20A1	ANKRD20A1,ANKRD20A3	ANKRD20A1,ANKRD20A3	chr9:67926760-67970293	NOTEST	0.0732749	0.0723267	-0.0187913	0	1	1	no		0.987059
ANKRD20A11P	ANKRD20A11P	ANKRD20A11P	chr21:15316095-15352765	NOTEST	0.0583523	0.0405569	-0.524842	0	1	1	no		0.695035
ANKRD20A12P	ANKRD20A12P	ANKRD20A12P	chr1:142697420-142713605	OK	6.93353	6.88542	-0.010046	-0.0559604	0.9146	0.954803	no		0.993061
ANKRD20A19P	ANKRD20A19P	ANKRD20A19P	chr13:24481422-24523454	NOTEST	0	0	0	0	1	1	no		1
ANKRD20A2	ANKRD20A2,ANKRD20A3	ANKRD20A2,ANKRD20A3	chr9:43089971-43133544	NOTEST	0.0260308	0.0205872	-0.338474	0	1	1	no		0.790877
ANKRD20A3	ANKRD20A3	ANKRD20A3	chr9:67926760-67970293	NOTEST	9.58395e-06	4.13689e-06	-1.21207	0	1	1	no		0.431649
ANKRD20A4	ANKRD20A4	ANKRD20A4	chr9:69381980-69425109	NOTEST	0.078603	0.0902278	0.198988	0	1	1	no		1.14789
ANKRD20A5P	ANKRD20A5P	ANKRD20A5P	chr18:14179095-14227049	NOTEST	0.0603338	0.0501867	-0.265661	0	1	1	no		0.831818
ANKRD20A8P	ANKRD20A8P	ANKRD20A8P	chr2:95421070-95522820	NOTEST	0.0204939	0.00655149	-1.6453	0	1	1	no		0.31968
ANKRD20A9P	ANKRD20A9P	ANKRD20A9P	chr13:19408542-19446109	NOTEST	0.0593846	0.061719	0.0556246	0	1	1	no		1.03931
ANKRD22	ANKRD22	ANKRD22	chr10:90562486-90611732	NOTEST	0.00454531	0	#NAME?	0	1	1	no		#NAME?
ANKRD23	ANKRD23	ANKRD23	chr2:97503650-97509758	OK	0.999344	0.70225	-0.508998	-1.43101	0.01385	0.0468877	yes		0.70271
ANKRD24	ANKRD24	ANKRD24	chr19:4183350-4224811	OK	0.969105	1.15354	0.251341	0.970502	0.0967	0.212511	no		1.19031
ANKRD26	ANKRD26	ANKRD26	chr10:27293044-27389427	OK	3.07256	3.33899	0.119969	0.826745	0.1517	0.296735	no		1.08671
ANKRD26P1	ANKRD26P1	ANKRD26P1	chr16:46503248-46603009	NOTEST	0.0115845	0.0146608	0.339776	0	1	1	no		1.26556
ANKRD26P3	ANKRD26P3	ANKRD26P3	chr13:19836939-19919113	NOTEST	0	0	0	0	1	1	no		1
ANKRD27	ANKRD27	ANKRD27	chr19:33087906-33166102	OK	12.2676	10.1741	-0.269954	-2.18565	0.0002	0.00128915	yes		0.829346
ANKRD28	ANKRD28	ANKRD28	chr3:15708743-15901053	OK	15.3849	15.9563	0.0526144	0.378669	0.5072	0.673928	no		1.03714
ANKRD29	ANKRD29	ANKRD29	chr18:21178889-21242849	OK	0.835056	0.688579	-0.27825	-0.846024	0.1326	0.269518	no		0.824591
ANKRD30A	ANKRD30A	ANKRD30A	chr10:37414784-37521495	NOTEST	0	0	0	0	1	1	no		1
ANKRD30B	ANKRD30B	ANKRD30B	chr18:14748238-14852737	NOTEST	0.0554228	0.139114	1.32771	0	1	1	no		2.51004
ANKRD30BL	ANKRD30BL	ANKRD30BL	chr2:132905163-133015542	NOTEST	0	0	0	0	1	1	no		1
ANKRD30BP2	ANKRD30BP2	ANKRD30BP2	chr21:14410486-14490571	NOTEST	0	0	0	0	1	1	no		1
ANKRD30BP3	ANKRD30BP3	ANKRD30BP3	chr10:45650109-45681489	NOTEST	0.0950936	0	#NAME?	0	1	1	no		#NAME?
ANKRD31	ANKRD31	ANKRD31	chr5:74364121-74532703	NOTEST	0.0989985	0.0664924	-0.574218	0	1	1	no		0.67165
ANKRD32	ANKRD32	ANKRD32	chr5:93954390-94031573	OK	2.81203	2.97983	0.0836172	0.466963	0.4114	0.587086	no		1.05967
ANKRD33	ANKRD33	ANKRD33	chr12:52281792-52285505	NOTEST	0.0125335	0	#NAME?	0	1	1	no		#NAME?
ANKRD33B	ANKRD33B	ANKRD33B	chr5:10564434-10657928	OK	2.23226	1.92384	-0.214513	-1.43096	0.01215	0.0420494	yes		0.861837
ANKRD34A	ANKRD34A	ANKRD34A	chr1:144146810-146467744	OK	0.951204	1.21367	0.351546	0.149689	0.72015	0.836684	no		1.27593
ANKRD34B	ANKRD34B	ANKRD34B	chr5:79852573-79866304	NOTEST	0.00492045	0	#NAME?	0	1	1	no		#NAME?
ANKRD34C	ANKRD34C	ANKRD34C	chr15:79484048-79590581	NOTEST	0	0	0	0	1	1	no		1
ANKRD34C-AS1	ANKRD34C-AS1	ANKRD34C-AS1	chr15:79484048-79590581	NOTEST	0	0	0	0	1	1	no		1
ANKRD35	ANKRD35	ANKRD35	chr1:144146810-146467744	OK	1.14201	1.29006	0.175864	0.0764439	0.94625	0.972237	no		1.12964
ANKRD36	ANKRD36	ANKRD36	chr2:97779232-97930257	OK	1.22625	1.15195	-0.0901816	-0.439539	0.439	0.612745	no		0.939404
ANKRD36B	ANKRD36B	ANKRD36B	chr2:98121260-98206428	OK	0.846919	0.743908	-0.187099	-0.758623	0.1892	0.34726	no		0.87837
ANKRD36BP1	ANKRD36BP1	ANKRD36BP1	chr1:168214818-168216668	OK	2.95697	2.60442	-0.183161	-0.746746	0.19685	0.356321	no		0.880771
ANKRD36BP2	ANKRD36BP2	ANKRD36BP2	chr2:89065418-89106109	NOTEST	0	0	0	0	1	1	no		1
ANKRD36C	ANKRD36C	ANKRD36C	chr2:96515295-96658068	OK	0.584591	0.466251	-0.326322	-1.26735	0.0321	0.0916163	no		0.797567
ANKRD37	ANKRD37	ANKRD37	chr4:186317839-186347139	OK	1.68975	2.36125	0.48274	0.700135	0.23455	0.404126	no		1.3974
ANKRD39	ANKRD39	ANKRD39	chr2:97513723-97523756	OK	7.49312	6.20754	-0.271547	-1.13265	0.05155	0.132185	no		0.828431
ANKRD40	ANKRD40	ANKRD40	chr17:48770550-48785270	OK	21.8492	22.9733	0.0723774	0.568795	0.31785	0.498424	no		1.05145
ANKRD42	ANKRD42	ANKRD42	chr11:82904780-82967141	OK	9.05054	9.06885	0.00291491	0.020165	0.97235	0.985783	no		1.00202
ANKRD44	ANKRD44	ANKRD44	chr2:197851385-198175521	OK	1.51343	1.49717	-0.0155843	-0.0694391	0.9023	0.948784	no		0.989256
ANKRD44-IT1	ANKRD44-IT1	ANKRD44-IT1	chr2:197851385-198175521	NOTEST	0	0	0	0	1	1	no		1
ANKRD45	ANKRD45	ANKRD45	chr1:173577474-173639001	NOTEST	0.0564782	0.0318559	-0.826133	0	1	1	no		0.564039
ANKRD46	ANKRD46	ANKRD46	chr8:101521979-101572014	OK	7.10659	6.90522	-0.0414705	-0.267771	0.64465	0.782243	no		0.971664
ANKRD49	ANKRD49	ANKRD49	chr11:94227152-94232744	OK	4.24126	4.06943	-0.0596656	-0.290256	0.60525	0.752986	no		0.959486
ANKRD50	ANKRD50	ANKRD50	chr4:125585203-125633887	OK	12.9245	16.4498	0.347958	2.3827	5e-05	0.000373901	yes		1.27276
ANKRD52	ANKRD52	ANKRD52	chr12:56623819-56652143	OK	27.9339	29.9075	0.098491	0.687983	0.2272	0.394417	no		1.07065
ANKRD53	ANKRD53	ANKRD53	chr2:71205574-71212629	NOTEST	0.0662043	0.151211	1.19156	0	1	1	no		2.284
ANKRD54	ANKRD54	ANKRD54	chr22:38226861-38240378	OK	8.72113	9.74053	0.159485	1.04996	0.0678	0.162576	no		1.11689
ANKRD55	ANKRD55	ANKRD55	chr5:55395506-55529186	NOTEST	0	0	0	0	1	1	no		1
ANKRD6	ANKRD6	ANKRD6	chr6:90142896-90529513	NOTEST	0.0408327	0.0365447	-0.16006	0	1	1	no		0.894988
ANKRD60	ANKRD60	ANKRD60	chr20:56791181-56803709	NOTEST	0	0	0	0	1	1	no		1
ANKRD61	ANKRD61	ANKRD61	chr7:6048881-6098860	NOTEST	0.424407	0.502665	0.244148	0	1	1	no		1.18439
ANKRD62	ANKRD62	ANKRD62	chr18:12093847-12129748	NOTEST	0	0	0	0	1	1	no		1
ANKRD62P1-PARP4P3	ANKRD62P1-PARP4P3	ANKRD62P1-PARP4P3	chr22:17134598-17156430	NOTEST	0	0	0	0	1	1	no		1
ANKRD63	ANKRD63	ANKRD63	chr15:40573644-40574787	NOTEST	0.0897957	0.0585252	-0.617588	0	1	1	no		0.65176
ANKRD65	ANKRD65	ANKRD65	chr1:1353799-1356824	NOTEST	0.0611375	0	#NAME?	0	1	1	no		#NAME?
ANKRD66	ANKRD66	ANKRD66	chr6:46714653-46726954	NOTEST	0	0	0	0	1	1	no		1
ANKRD7	ANKRD7	ANKRD7	chr7:117864711-117882784	NOTEST	0	0	0	0	1	1	no		1
ANKRD9	ANKRD9	ANKRD9	chr14:102973197-102976128	OK	1.37644	1.06925	-0.364334	-0.978099	0.09255	0.205867	no		0.776827
ANKS1A	ANKS1A	ANKS1A	chr6:34857037-35059190	OK	4.87078	7.03174	0.529729	4.07952	5e-05	0.000373901	yes		1.44366
ANKS1B	ANKS1B	ANKS1B	chr12:99039077-100378432	OK	1.60556	1.83415	0.192038	0.364521	0.51155	0.677756	no		1.14238
ANKS3	ANKS3	ANKS3	chr16:4746510-4799397	OK	4.92256	5.0823	0.0460733	0.249749	0.65665	0.790411	no		1.03245
ANKS4B	ANKS4B	ANKS4B	chr16:21245015-21263750	NOTEST	0.00677669	0	#NAME?	0	1	1	no		#NAME?
ANKS6	ANKS6	ANKS6	chr9:101494290-101558794	OK	2.70948	2.3426	-0.209904	-1.37237	0.0165	0.0541613	no		0.864595
ANKUB1	ANKUB1	ANKUB1	chr3:149478889-149510610	NOTEST	0.00753939	0.00996717	0.402735	0	1	1	no		1.32201
ANKZF1	ANKZF1	ANKZF1	chr2:220094478-220110151	OK	5.88097	6.25784	0.0896099	0.487776	0.39215	0.568764	no		1.06408
ANLN	ANLN	ANLN	chr7:36363758-36493401	OK	3.65991	1.05369	-1.79635	-8.77452	5e-05	0.000373901	yes		0.287902
ANO1	ANO1	ANO1	chr11:69924407-70035652	NOTEST	0.0199651	0.0240846	0.270633	0	1	1	no		1.20634
ANO1-AS2	ANO1-AS2	ANO1-AS2	chr11:69918539-69921454	NOTEST	0	0	0	0	1	1	no		1
ANO10	ANO10	ANO10	chr3:43407817-43663560	OK	37.3859	35.3613	-0.0803225	-0.633432	0.26705	0.442211	no		0.945846
ANO2	ANO2	ANO2	chr12:5671816-6055398	NOTEST	0.0201861	0.0311051	0.623789	0	1	1	no		1.54092
ANO3	ANO3	ANO3	chr11:26353677-26684836	NOTEST	0.155813	0.180182	0.209643	0	1	1	no		1.1564
ANO4	ANO4	ANO4	chr12:101188373-101522419	NOTEST	0	0	0	0	1	1	no		1
ANO5	ANO5	ANO5	chr11:22214721-22304913	NOTEST	0	0	0	0	1	1	no		1
ANO6	ANO6	ANO6	chr12:45566816-45834187	OK	25.7741	29.445	0.192099	1.31231	0.02255	0.0695021	no		1.14242
ANO7	ANO7	ANO7	chr2:242127923-242164791	NOTEST	0.110831	0.0839557	-0.400655	0	1	1	no		0.757514
ANO8	ANO8	ANO8	chr19:17420336-17445638	OK	4.20847	4.15087	-0.0198826	-0.0648715	0.9063	0.950211	no		0.986313
ANO9	ANO9	ANO9	chr11:417929-442011	NOTEST	0.210776	0.148279	-0.507395	0	1	1	no		0.703492
ANOS1	ANOS1	ANOS1	chrX:8496914-8700227	NOTEST	0	0	0	0	1	1	no		1
ANP32A	ANP32A	ANP32A	chr15:69070874-69113261	OK	57.522	64.69	0.16943	1.16319	0.04195	0.112711	no		1.12461
ANP32A-IT1	ANP32A-IT1	ANP32A-IT1	chr15:69070874-69113261	NOTEST	0.144155	0.139413	-0.048252	0	1	1	no		0.967107
ANP32AP1	ANP32AP1	ANP32AP1	chr15:35529526-35530264	NOTEST	0.0330288	0.0269882	-0.291397	0	1	1	no		0.81711
ANP32B	ANP32B	ANP32B	chr9:100745488-100778224	OK	94.6975	84.2098	-0.169338	-1.16063	0.04155	0.111878	no		0.889251
ANP32C	ANP32C	ANP32C	chr4:164445449-165304407	NOTEST	0	0.0286712	inf	0	1	1	no		#VALUE!
ANP32D	ANP32D	ANP32D	chr12:48866447-48866843	NOTEST	0	0	0	0	1	1	no		1
ANP32E	ANP32E	ANP32E	chr1:150190716-150208504	OK	12.0442	14.433	0.261027	2.07837	0.0002	0.00128915	yes		1.19833
ANPEP	ANPEP	ANPEP	chr15:90328125-90358072	OK	212.144	218.385	0.0418284	0.296103	0.60325	0.751702	no		1.02942
ANTXR1	ANTXR1	ANTXR1	chr2:69240275-69476459	OK	121.862	120.434	-0.0170131	-0.108237	0.85205	0.921624	no		0.988277
ANTXR2	ANTXR2	ANTXR2	chr4:80822770-80994626	OK	8.76116	13.5428	0.628333	3.82858	5e-05	0.000373901	yes		1.54578
ANTXRL	ANTXRL	ANTXRL	chr10:47658232-47701443	NOTEST	0	0	0	0	1	1	no		1
ANTXRLP1	ANTXRLP1	ANTXRLP1	chr10:47590260-47640844	NOTEST	0	0	0	0	1	1	no		1
ANXA1	ANXA1	ANXA1	chr9:75766646-75785310	OK	132.812	118.038	-0.170138	-1.17771	0.03825	0.105088	no		0.888758
ANXA10	ANXA10	ANXA10	chr4:169013687-169108893	NOTEST	0	0.0291385	inf	0	1	1	no		#VALUE!
ANXA11	ANXA11	ANXA11	chr10:81914879-81965433	OK	52.8448	39.3387	-0.425813	-3.24545	5e-05	0.000373901	yes		0.744419
ANXA13	ANXA13	ANXA13	chr8:124693033-124749647	NOTEST	0	0	0	0	1	1	no		1
ANXA2	ANXA2	ANXA2	chr15:60639349-60690185	OK	1642.63	1625.22	-0.0153739	-0.108028	0.85195	0.921624	no		0.9894
ANXA2P1	ANXA2P1	ANXA2P1	chr4:154074269-154260474	NOTEST	0.0148691	0	#NAME?	0	1	1	no		#NAME?
ANXA2P2	ANXA2P2	ANXA2P2	chr9:33624222-33625532	OK	1.7236	1.90641	0.14543	0.41495	0.47355	0.644105	no		1.10606
ANXA2P3	ANXA2P3	ANXA2P3	chr10:66585284-66586634	NOTEST	0	0	0	0	1	1	no		1
ANXA2R	ANXA2R	ANXA2R	chr5:43014830-43093660	OK	3.03846	2.5229	-0.268258	-0.664432	0.25165	0.424175	no		0.830322
ANXA3	ANXA3	ANXA3	chr4:79472741-79531605	OK	4.60591	4.85718	0.0766322	0.364912	0.51455	0.680273	no		1.05455
ANXA4	ANXA4	ANXA4	chr2:69969126-70053596	OK	52.452	65.3487	0.31716	2.16382	0.0002	0.00128915	yes		1.24588
ANXA5	ANXA5	ANXA5	chr4:122589151-122618147	OK	419.278	435.451	0.0546035	0.386141	0.50215	0.669659	no		1.03857
ANXA6	ANXA6	ANXA6	chr5:150480266-150537443	OK	33.5966	36.111	0.10412	0.728386	0.20045	0.360787	no		1.07484
ANXA7	ANXA7	ANXA7	chr10:75135188-75173841	OK	51.7981	51.827	0.000804452	0.00546081	0.99315	0.995796	no		1.00056
ANXA8	ANXA8	ANXA8	chr10:48255203-48271368	NOTEST	0	0	0	0	1	1	no		1
ANXA8L1	ANXA8L1	ANXA8L1	chr10:47746849-47763040	NOTEST	0	0	0	0	1	1	no		1
ANXA9	ANXA9	ANXA9	chr1:150954498-150968114	NOTEST	0.203413	0.453741	1.15746	0	1	1	no		2.23064
AOAH	AOAH	AOAH	chr7:36552548-36764154	NOTEST	0	0	0	0	1	1	no		1
AOAH-IT1	AOAH-IT1	AOAH-IT1	chr7:36552548-36764154	NOTEST	0	0	0	0	1	1	no		1
AOC1	AOC1	AOC1	chr7:150549564-150558379	NOTEST	0	0.00819188	inf	0	1	1	no		#VALUE!
AOC2	AOC2	AOC2	chr17:40996608-41002724	OK	1.49171	1.82297	0.289328	1.08174	0.0516	0.132286	no		1.22207
AOC3	AOC3	AOC3	chr17:41003200-41010147	NOTEST	0.339776	0.432456	0.347969	0	1	1	no		1.27277
AOC4P	AOC4P	AOC4P	chr17:41019161-41021234	NOTEST	0.0182662	0	#NAME?	0	1	1	no		#NAME?
AOX1	AOX1	AOX1	chr2:201450730-201536217	OK	15.8811	13.1541	-0.2718	-2.3135	0.0002	0.00128915	yes		0.828285
AOX2P	AOX2P	AOX2P	chr2:201560445-201688569	NOTEST	0	0.00426534	inf	0	1	1	no		#VALUE!
AP1AR	AP1AR	AP1AR	chr4:113152894-113191211	OK	10.9122	10.9805	0.00900104	0.0673939	0.9048	0.949437	no		1.00626
AP1B1	AP1B1	AP1B1	chr22:29723668-29784572	OK	23.7347	21.8415	-0.119923	-0.933931	0.10165	0.220656	no		0.920237
AP1B1P1	AP1B1P1	AP1B1P1	chr22:32517963-32529456	NOTEST	0	0	0	0	1	1	no		1
AP1G1	AP1G1	AP1G1	chr16:71762904-71842976	OK	24.4215	24.6298	0.0122521	0.0846004	0.87975	0.935163	no		1.00853
AP1G2	AP1G2	AP1G2	chr14:23980968-24048009	OK	35.2646	45.4935	0.367436	2.09444	0.0005	0.0028739	yes		1.29006
AP1M1	AP1M1	AP1M1	chr19:16308664-16346156	OK	68.8531	55.2559	-0.317394	-2.1767	5e-05	0.000373901	yes		0.802518
AP1M2	AP1M2	AP1M2	chr19:10683346-10697991	NOTEST	0.02197	0.194723	3.14781	0	1	1	no		8.86309
AP1S1	AP1S1	AP1S1	chr7:100797685-100804557	OK	62.9697	70.1266	0.155304	1.33443	0.0184	0.0592089	no		1.11366
AP1S2	AP1S2	AP1S2	chrX:15843928-15873137	OK	8.37461	7.84386	-0.0944578	-0.615322	0.28675	0.463645	no		0.936624
AP1S3	AP1S3	AP1S3	chr2:224620046-224702319	OK	5.15065	5.66063	0.136208	0.928728	0.0997	0.217635	no		1.09901
AP2A1	AP2A1	AP2A1	chr19:50270179-50316567	OK	47.4372	39.9982	-0.246083	-1.64897	0.00405	0.0170989	yes		0.843183
AP2A2	AP2A2	AP2A2	chr11:925808-1012245	OK	24.1539	24.5103	0.0211354	0.142835	0.80105	0.890796	no		1.01476
AP2B1	AP2B1	AP2B1	chr17:33914281-34053436	OK	84.3123	84.8009	0.00833561	0.0590323	0.91815	0.95682	no		1.00579
AP2M1	AP2M1	AP2M1	chr3:183892633-183901879	OK	204.526	206.73	0.015464	0.108492	0.84895	0.91998	no		1.01078
AP2S1	AP2S1	AP2S1	chr19:47341414-47354252	OK	128.902	93.5819	-0.461975	-3.4242	5e-05	0.000373901	yes		0.725992
AP3B1	AP3B1	AP3B1	chr5:77298149-77590579	OK	27.721	25.9891	-0.0930707	-0.633131	0.26935	0.444952	no		0.937525
AP3B2	AP3B2	AP3B2	chr15:83211950-83378660	NOTEST	0	0	0	0	1	1	no		1
AP3D1	AP3D1	AP3D1	chr19:2100986-2151556	OK	54.3135	52.6594	-0.0446196	-0.311648	0.5835	0.736475	no		0.969545
AP3M1	AP3M1	AP3M1	chr10:75880014-75910826	OK	20.6648	16.1243	-0.357936	-2.69516	5e-05	0.000373901	yes		0.78028
AP3M2	AP3M2	AP3M2	chr8:42010463-42028701	OK	4.69592	4.90164	0.0618566	0.39658	0.4838	0.652679	no		1.04381
AP3S1	AP3S1	AP3S1	chr5:115177618-115249778	OK	58.69	53.6843	-0.128615	-1.08276	0.05865	0.146195	no		0.914709
AP3S2	AP3S2	AP3S2	chr15:90373830-90456222	OK	10.6441	10.0834	-0.0780778	-0.356813	0.5277	0.69111	no		0.947319
AP4B1	AP4B1	AP4B1	chr1:114355233-114447746	OK	5.19823	4.23905	-0.294277	-1.80259	0.0011	0.00568349	yes		0.815481
AP4B1-AS1	AP4B1-AS1	AP4B1-AS1	chr1:114355233-114447746	NOTEST	0.170306	0.0629065	-1.43685	0	1	1	no		0.369373
AP4E1	AP4E1	AP4E1	chr15:51200868-51298097	OK	5.38084	4.46262	-0.269942	-2.04844	0.0003	0.00183562	yes		0.829353
AP4M1	AP4M1	AP4M1	chr7:99690350-99723128	OK	7.73437	8.42169	0.122826	0.292377	0.61765	0.762835	no		1.08887
AP4S1	AP4S1	AP4S1	chr14:31363004-31565656	OK	3.14449	2.34847	-0.421107	-1.28506	0.02195	0.0680412	no		0.746851
AP5B1	AP5B1	AP5B1	chr11:65541368-65548062	OK	6.33698	6.63198	0.0656425	0.520263	0.3659	0.545674	no		1.04655
AP5M1	AP5M1	AP5M1	chr14:57669193-57756797	OK	10.6913	12.6827	0.246425	0.771053	0.1763	0.330639	no		1.18626
AP5S1	AP5S1	AP5S1	chr20:3801170-3805954	OK	22.1902	19.698	-0.171871	-1.32395	0.02025	0.06392	no		0.887691
AP5Z1	AP5Z1	AP5Z1	chr7:4815261-4834026	OK	9.50464	10.2251	0.105416	0.867473	0.1306	0.266543	no		1.0758
APAF1	APAF1	APAF1	chr12:99039077-100378432	OK	5.40019	6.27627	0.216897	1.65482	0.00385	0.016377	yes		1.16223
APBA1	APBA1	APBA1	chr9:72042448-72287275	OK	2.9453	2.98507	0.0193506	0.129253	0.8198	0.901262	no		1.0135
APBA2	APBA2	APBA2	chr15:29213839-29410516	OK	2.87985	3.09206	0.102572	0.566303	0.31525	0.495661	no		1.07369
APBA3	APBA3	APBA3	chr19:3708334-3987432	OK	12.2998	10.4165	-0.239762	-0.1224	0.83205	0.909416	no		0.846885
APBB1	APBB1	APBB1	chr11:6416353-6440702	OK	11.3779	7.66107	-0.570622	-3.84677	5e-05	0.000373901	yes		0.673326
APBB1IP	APBB1IP	APBB1IP	chr10:26727265-26856732	NOTEST	0	0	0	0	1	1	no		1
APBB2	APBB2	APBB2	chr4:40812043-41216635	OK	11.5012	8.88151	-0.372909	-2.80115	5e-05	0.000373901	yes		0.772224
APBB3	APBB3	APBB3	chr5:139937852-139948689	OK	10.2606	13.4618	0.391762	1.15683	0.04445	0.117822	no		1.31199
APC	APC	APC	chr5:112043201-112181936	OK	4.81083	4.83605	0.00754298	0.061873	0.914	0.95447	no		1.00524
APC2	APC2	APC2	chr19:1450147-1479228	OK	1.34117	1.15984	-0.209567	-0.790605	0.16475	0.314293	no		0.864797
APCDD1	APCDD1	APCDD1	chr18:10454624-10488698	NOTEST	0	0	0	0	1	1	no		1
APCDD1L	APCDD1L	APCDD1L	chr20:57034159-57089994	OK	1.08416	0.76946	-0.494658	-1.3589	0.00825	0.030745	yes		0.70973
APCDD1L-AS1	APCDD1L-AS1	APCDD1L-AS1	chr20:57090434-57194948	OK	0.908299	0.65466	-0.472421	-1.15742	0.04915	0.127478	no		0.720754
APCS	APCS	APCS	chr1:159557615-159558661	OK	8.69791	13.04	0.584204	2.93729	5e-05	0.000373901	yes		1.49921
APEH	APEH	APEH	chr3:49711434-49720934	OK	13.6888	14.2261	0.0555438	0.42916	0.4543	0.626011	no		1.03925
APELA	APELA	APELA	chr4:165798139-165818679	NOTEST	0	0	0	0	1	1	no		1
APEX1	APEX1	APEX1	chr14:20923289-20925931	OK	138.147	146.97	0.0893158	0.623192	0.27485	0.450622	no		1.06387
APEX2	APEX2	APEX2	chrX:55026755-55034306	OK	25.7609	24.818	-0.0537985	-0.437425	0.44255	0.616453	no		0.963396
APH1A	APH1A	APH1A	chr1:150237798-150241609	OK	42.728	59.6307	0.480872	3.65097	5e-05	0.000373901	yes		1.39559
APH1B	APH1B	APH1B	chr15:63569748-63601325	OK	19.5092	22.2648	0.190612	1.66047	0.00435	0.018174	yes		1.14125
API5	API5	API5	chr11:43333504-43366080	OK	40.7798	44.1091	0.113223	0.776004	0.17525	0.329167	no		1.08164
APIP	APIP	APIP	chr11:34903842-35017675	OK	11.3438	11.1963	-0.0188835	-0.0666681	0.9036	0.949196	no		0.986996
APITD1	APITD1,APITD1-CORT	APITD1,APITD1-CORT	chr1:10490158-10512060	OK	5.34438	7.18838	0.427646	1.90547	0.001	0.00523872	yes		1.34504
APITD1-CORT	APITD1-CORT	APITD1-CORT	chr1:10490158-10512060	OK	0.547713	0.675547	0.302635	0.332883	0.5154	0.680968	no		1.2334
APLF	APLF	APLF	chr2:68694690-68807294	OK	0.969721	1.13647	0.228913	0.864105	0.1375	0.27694	no		1.17195
APLN	APLN	APLN	chrX:128779235-128788933	OK	30.0669	22.7927	-0.399608	-3.26242	5e-05	0.000373901	yes		0.758064
APLNR	APLNR	APLNR	chr11:57001051-57004927	NOTEST	0.0138727	0.0150189	0.114527	0	1	1	no		1.08262
APLP1	APLP1	APLP1	chr19:36359400-36370699	OK	39.6429	47.4008	0.257846	1.95701	0.00135	0.00676416	yes		1.19569
APLP2	APLP2	APLP2	chr11:129939715-130014706	OK	500.014	545.207	0.124834	0.882598	0.1246	0.257599	no		1.09038
APMAP	APMAP	APMAP	chr20:24943579-24973425	OK	154.62	158.942	0.0397724	0.279346	0.6229	0.766788	no		1.02795
APOA1	APOA1	APOA1	chr11:116706468-116969131	NOTEST	0.126609	0.171924	0.441389	0	1	1	no		1.35791
APOA1-AS	APOA1-AS	APOA1-AS	chr11:116706468-116969131	NOTEST	0.0961114	0.0477995	-1.00771	0	1	1	no		0.497335
APOA1BP	APOA1BP	APOA1BP	chr1:156561557-156564091	OK	66.6424	68.9036	0.0481405	0.406474	0.4769	0.647244	no		1.03393
APOA2	APOA2	APOA2	chr1:161192082-161193418	NOTEST	0	0	0	0	1	1	no		1
APOA4	APOA4	APOA4	chr11:116691417-116694011	NOTEST	0.0279317	0	#NAME?	0	1	1	no		#NAME?
APOA5	APOA5	APOA5	chr11:116660085-116663136	NOTEST	0.00983012	0.0175117	0.833035	0	1	1	no		1.78143
APOB	APOB	APOB	chr2:21224300-21266945	NOTEST	0.00371929	0.00350448	-0.085828	0	1	1	no		0.942244
APOBEC1	APOBEC1	APOBEC1	chr12:7801995-7823195	NOTEST	0.0253948	0	#NAME?	0	1	1	no		#NAME?
APOBEC2	APOBEC2	APOBEC2	chr6:41020939-41032630	NOTEST	0.0116919	0.0261121	1.15921	0	1	1	no		2.23335
APOBEC3A	APOBEC3A	APOBEC3A	chr22:39353526-39394225	NOTEST	0	0	0	0	1	1	no		1
APOBEC3A_B	APOBEC3A_B	APOBEC3A_B	chr22:39353526-39394225	NOTEST	7.07679e-129	3.13246e-54	247.969	0	1	1	no		4.42697e+74
APOBEC3B	APOBEC3B	APOBEC3B	chr22:39353526-39394225	OK	1.42073	0.560236	-1.34252	-2.71791	5e-05	0.000373901	yes		0.394331
APOBEC3B-AS1	APOBEC3B-AS1	APOBEC3B-AS1	chr22:39353526-39394225	NOTEST	0.0352995	0.144859	2.03693	0	1	1	no		4.10371
APOBEC3C	APOBEC3C	APOBEC3C	chr22:39410264-39414825	OK	65.3831	66.1882	0.0176545	0.148289	0.8	0.89029	no		1.01231
APOBEC3D	APOBEC3D	APOBEC3D	chr22:39417117-39429256	OK	1.01209	0.856167	-0.241378	-0.709308	0.21985	0.385482	no		0.845937
APOBEC3F	APOBEC3F	APOBEC3F	chr22:39436672-39451975	OK	2.94365	3.26224	0.148255	0.389061	0.49275	0.661027	no		1.10823
APOBEC3G	APOBEC3G	APOBEC3G	chr22:39473009-39483748	OK	2.26171	2.13796	-0.0811771	-0.298731	0.61055	0.757153	no		0.945286
APOBEC3H	APOBEC3H	APOBEC3H	chr22:39493228-39500072	OK	1.61081	3.83996	1.25331	3.34071	5e-05	0.000373901	yes		2.38388
APOBEC4	APOBEC4	APOBEC4	chr1:183605181-183897685	NOTEST	0	0	0	0	1	1	no		1
APOBR	APOBR	APOBR	chr16:28505969-28510291	NOTEST	0.0438172	0.0552639	0.334838	0	1	1	no		1.26124
APOC1	APOC1	APOC1	chr19:45417920-45422606	OK	1.49759	1.80312	0.267857	0.358093	0.54185	0.704008	no		1.20402
APOC1P1	APOC1P1	APOC1P1	chr19:45430059-45434643	NOTEST	0.279459	0.165072	-0.759547	0	1	1	no		0.590682
APOC2	APOC2	APOC2	chr19:45445494-45452822	NOTEST	0	0	0	0	1	1	no		1
APOC3	APOC3	APOC3	chr11:116700623-116703787	NOTEST	0.104241	0.136763	0.391757	0	1	1	no		1.31199
APOC4	APOC4	APOC4	chr19:45445494-45452822	NOTEST	0.0397922	0	#NAME?	0	1	1	no		#NAME?
APOC4-APOC2	APOC4-APOC2	APOC4-APOC2	chr19:45445494-45452822	NOTEST	3.71232e-08	0	#NAME?	0	1	1	no		#NAME?
APOD	APOD	APOD	chr3:195295572-195311076	OK	42.3986	63.3897	0.58023	4.71495	5e-05	0.000373901	yes		1.49509
APOE	APOE	APOE	chr19:45409005-45412652	NOTEST	0.215734	0.248716	0.205252	0	1	1	no		1.15289
APOF	APOF	APOF	chr12:56754354-56756583	NOTEST	0.0112655	0	#NAME?	0	1	1	no		#NAME?
APOH	APOH	APOH	chr17:64208146-64225556	NOTEST	0.0169385	0	#NAME?	0	1	1	no		#NAME?
APOL1	APOL1	APOL1	chr22:36649116-36663577	OK	4.76414	4.55892	-0.0635224	-0.375121	0.5139	0.679854	no		0.956925
APOL2	APOL2	APOL2	chr22:36622254-36636000	OK	17.0539	17.4214	0.0307573	0.242787	0.6665	0.798553	no		1.02155
APOL3	APOL3	APOL3	chr22:36536370-36562225	OK	4.93657	4.02754	-0.293613	-1.51301	0.0076	0.0286755	yes		0.815856
APOL4	APOL4	APOL4	chr22:36585175-36600879	NOTEST	0	0.00497361	inf	0	1	1	no		#VALUE!
APOL5	APOL5	APOL5	chr22:36113918-36125529	NOTEST	0	0	0	0	1	1	no		1
APOL6	APOL6	APOL6	chr22:36044423-36064456	OK	2.23381	1.79156	-0.318289	-2.15062	0.0003	0.00183562	yes		0.80202
APOLD1	APOLD1	APOLD1	chr12:12878850-12944399	OK	1.16617	1.18835	0.0271723	0.116243	0.8433	0.916496	no		1.01901
APOM	APOM	APOM	chr6_ssto_hap7:2937601-2956785	NOTEST	0.334323	0.386341	0.208631	0	1	1	no		1.15559
APOO	APOO	APOO	chrX:23851464-23926057	OK	13.2527	13.336	0.00903906	0.0530646	0.9259	0.961291	no		1.00629
APOOL	APOOL	APOOL	chrX:84258897-84363974	OK	4.92268	4.55834	-0.110934	-0.814602	0.1584	0.30589	no		0.925988
APOOP5	APOOP5	APOOP5	chr16:59788044-59789095	NOTEST	0	0	0	0	1	1	no		1
APOPT1	APOPT1	APOPT1	chr14:104029293-104058510	OK	22.0714	23.3139	0.0790169	0.560003	0.33165	0.513196	no		1.0563
APP	APP	APP	chr21:27252860-27543446	OK	581.98	662.36	0.186647	1.30961	0.02185	0.0677989	no		1.13812
APPBP2	APPBP2	APPBP2	chr17:58520509-58603601	OK	14.3906	14.5712	0.0179885	0.152728	0.7873	0.883424	no		1.01255
APPL1	APPL1	APPL1	chr3:57261764-57326710	OK	8.58276	8.13591	-0.0771371	-0.625476	0.28015	0.45642	no		0.947937
APPL2	APPL2	APPL2	chr12:105567074-105630008	OK	14.6225	13.1233	-0.15606	-1.23745	0.0311	0.0895441	no		0.897473
APRT	APRT	APRT	chr16:88875876-88878342	OK	227	262.408	0.209122	1.42407	0.01295	0.0443852	yes		1.15598
APTR	APTR	APTR	chr7:77313167-77409120	OK	0.867649	1.18158	0.445532	0.694138	0.22665	0.393847	no		1.36182
APTX	APTX	APTX	chr9:32972603-33001639	OK	8.62736	9.04458	0.0681343	0.428785	0.45565	0.627174	no		1.04836
AQP1	AQP1	AQP1	chr7:30951414-30965131	NOTEST	0.442761	0.203335	-1.12267	0	1	1	no		0.459243
AQP10	AQP10	AQP10	chr1:154293591-154297801	NOTEST	0	0	0	0	1	1	no		1
AQP11	AQP11	AQP11	chr11:77300679-77321401	OK	0.93037	0.743915	-0.322668	-0.838898	0.15065	0.295285	no		0.79959
AQP12A	AQP12A	AQP12A	chr2:241631261-241637900	NOTEST	0	0	0	0	1	1	no		1
AQP12B	AQP12B	AQP12B	chr2:241615834-241622317	NOTEST	0	0	0	0	1	1	no		1
AQP2	AQP2	AQP2	chr12:50344523-50359465	NOTEST	0.0131923	0.00379014	-1.79938	0	1	1	no		0.287298
AQP3	AQP3	AQP3	chr9:33441151-33447631	OK	0.940956	1.2202	0.374918	1.0161	0.0779	0.180724	no		1.29677
AQP4	AQP4	AQP4	chr18:24432007-24765302	NOTEST	0	0	0	0	1	1	no		1
AQP4-AS1	AQP4-AS1	AQP4-AS1	chr18:24432007-24765302	NOTEST	0	0	0	0	1	1	no		1
AQP5	AQP5	AQP5	chr12:50344523-50359465	NOTEST	0.0103336	0	#NAME?	0	1	1	no		#NAME?
AQP6	AQP6	AQP6	chr12:50366619-50370922	NOTEST	0.0487957	0.00612246	-2.99457	0	1	1	no		0.125471
AQP7	AQP7	AQP7	chr9:33384947-33402517	NOTEST	0	0	0	0	1	1	no		1
AQP7P1	AQP7P1	AQP7P1	chr9:67270214-67289492	OK	0.787831	0.930439	0.240025	0.755079	0.1915	0.350003	no		1.18101
AQP7P3	AQP7P3	AQP7P3	chr9:42844369-42893137	OK	1.30909	1.05964	-0.304998	-0.379506	0.50665	0.673491	no		0.809443
AQP8	AQP8	AQP8	chr16:25228284-25240253	NOTEST	0	0.0134011	inf	0	1	1	no		#VALUE!
AQP9	AQP9	AQP9	chr15:58430407-58478110	NOTEST	0	0.0118431	inf	0	1	1	no		#VALUE!
AQR	AQR	AQR	chr15:35148551-35261995	OK	13.7368	13.1581	-0.0621017	-0.526578	0.35895	0.539903	no		0.957868
AR	AR	AR	chrX:66763873-66950461	OK	7.77004	7.28543	-0.0929087	-0.768876	0.17845	0.333764	no		0.93763
ARAF	ARAF	ARAF	chrX:47420498-47479256	OK	31.9378	28.0793	-0.185759	-0.504136	0.38185	0.560766	no		0.879186
ARAP1	ARAP1	ARAP1	chr11:72396113-72463434	OK	33.6981	34.0861	0.0165169	0.113422	0.8446	0.91692	no		1.01151
ARAP2	ARAP2	ARAP2	chr4:36067619-36275837	NOTEST	0	0	0	0	1	1	no		1
ARAP3	ARAP3	ARAP3	chr5:141032967-141061800	OK	21.9726	25.5672	0.218584	1.49377	0.0095	0.0344223	yes		1.16359
ARC	ARC	ARC	chr8:143692404-143695833	NOTEST	0.239281	0.178249	-0.424816	0	1	1	no		0.744934
ARCN1	ARCN1	ARCN1	chr11:118443101-118473747	OK	89.8145	87.3695	-0.039819	-0.279324	0.62905	0.771606	no		0.972777
AREG	AREG	AREG	chr4:75310814-75320726	NOTEST	0.337193	1.67957	3.48599	0	1	1	no		11.2044
AREL1	AREL1	AREL1	chr14:75127954-75179807	OK	17.6607	19.6381	0.153108	1.0726	0.0573	0.143493	no		1.11196
ARF1	ARF1	ARF1	chr1:228270360-228286913	OK	199.093	199.41	0.00229657	0.0161183	0.9794	0.989147	no		1.00159
ARF3	ARF3	ARF3	chr12:49329991-49351252	OK	112.714	100.245	-0.169143	-1.18969	0.03735	0.103209	no		0.889371
ARF4	ARF4	ARF4	chr3:57557089-57583215	OK	139.107	166.9	0.262792	1.83535	0.0014	0.00697249	yes		1.1998
ARF5	ARF5	ARF5	chr7:127228405-127231759	OK	58.1101	48.6247	-0.2571	-2.09002	0.00025	0.00156594	yes		0.836768
ARF6	ARF6	ARF6	chr14:50359735-50363772	OK	33.8241	37.3665	0.143693	0.986155	0.0819	0.187379	no		1.10473
ARFGAP1	ARFGAP1	ARFGAP1	chr20:61904136-61921142	OK	60.6052	68.7734	0.18241	1.28176	0.0249	0.0749413	no		1.13478
ARFGAP2	ARFGAP2	ARFGAP2	chr11:46958239-47198676	OK	22.7974	23.7615	0.05976	0.332195	0.56195	0.72051	no		1.04229
ARFGAP3	ARFGAP3	ARFGAP3	chr22:43192531-43253408	OK	31.6032	34.6823	0.134132	1.10712	0.05215	0.133475	no		1.09743
ARFGEF1	ARFGEF1	ARFGEF1	chr8:68109883-68255912	OK	9.02945	9.84375	0.124569	1.05713	0.06355	0.155354	no		1.09018
ARFGEF2	ARFGEF2	ARFGEF2	chr20:47538274-47653230	OK	29.3909	29.7984	0.0198629	0.138977	0.8086	0.895074	no		1.01386
ARFGEF3	ARFGEF3	ARFGEF3	chr6:138483052-138665800	NOTEST	0.0295984	0.0354151	0.258843	0	1	1	no		1.19652
ARFIP1	ARFIP1	ARFIP1	chr4:153701088-153833063	OK	7.35793	9.89264	0.427055	3.0337	5e-05	0.000373901	yes		1.34449
ARFIP2	ARFIP2	ARFIP2	chr11:6495912-6505911	OK	20.7802	18.784	-0.14571	-0.924681	0.103	0.223002	no		0.903934
ARFRP1	ARFRP1	ARFRP1	chr20:62289162-62370460	OK	24.6465	22.374	-0.13956	-0.536766	0.35735	0.538213	no		0.907796
ARG1	ARG1	ARG1	chr6:131894343-131949379	NOTEST	0.0142886	0	#NAME?	0	1	1	no		#NAME?
ARG2	ARG2	ARG2	chr14:68086578-68141602	OK	3.64753	3.86164	0.0822942	0.187789	0.7491	0.85778	no		1.0587
ARGFX	ARGFX	ARGFX	chr3:121286777-121309469	NOTEST	0	0	0	0	1	1	no		1
ARGFXP2	ARGFXP2	ARGFXP2	chr17:30469472-30552790	NOTEST	0.0168888	0.050779	1.58816	0	1	1	no		3.00666
ARGLU1	ARGLU1	ARGLU1	chr13:107195661-107220514	OK	23.6779	24.2784	0.0361335	0.281626	0.61915	0.764156	no		1.02536
ARHGAP1	ARHGAP1	ARHGAP1	chr11:46698624-46722215	OK	29.591	30.7951	0.0575423	0.38986	0.49275	0.661027	no		1.04069
ARHGAP10	ARHGAP10	ARHGAP10	chr4:148653452-148993927	OK	6.86802	8.08144	0.234718	1.61483	0.0048	0.0197159	yes		1.17668
ARHGAP11A	ARHGAP11A	ARHGAP11A	chr15:32907344-32932150	OK	3.83223	2.91172	-0.396314	-2.19597	0.0002	0.00128915	yes		0.759797
ARHGAP11B	ARHGAP11B	ARHGAP11B	chr15:30918878-30931013	OK	0.70602	0.488727	-0.530681	-0.714254	0.22675	0.393911	no		0.692228
ARHGAP12	ARHGAP12	ARHGAP12	chr10:32094325-32217804	OK	10.6104	10.0994	-0.0712122	-0.581321	0.3112	0.49147	no		0.951838
ARHGAP15	ARHGAP15	ARHGAP15	chr2:143886898-144525921	NOTEST	0	0	0	0	1	1	no		1
ARHGAP17	ARHGAP17	ARHGAP17	chr16:24930704-25026699	OK	26.1525	28.1678	0.107097	0.932844	0.107	0.229344	no		1.07706
ARHGAP18	ARHGAP18	ARHGAP18	chr6:129898239-130031370	OK	16.2635	15.5376	-0.0658702	-0.542372	0.34055	0.5228	no		0.955369
ARHGAP19	ARHGAP19	ARHGAP19	chr10:98757794-99052430	OK	1.8436	1.47774	-0.319136	-1.65236	0.0036	0.0154886	yes		0.80155
ARHGAP19-SLIT1	ARHGAP19-SLIT1	ARHGAP19-SLIT1	chr10:98757794-99052430	NOTEST	5.35022e-24	5.28603e-16	26.558	0	1	1	no		9.87995e+07
ARHGAP20	ARHGAP20	ARHGAP20	chr11:110447758-110583912	NOTEST	0.00302099	0	#NAME?	0	1	1	no		#NAME?
ARHGAP21	ARHGAP21	ARHGAP21	chr10:24872537-25012597	OK	17.4113	17.8484	0.0357725	0.244858	0.66765	0.799391	no		1.02511
ARHGAP22	ARHGAP22	ARHGAP22	chr10:49654067-49864310	OK	24.8119	22.6926	-0.128813	-1.08187	0.0598	0.148259	no		0.914584
ARHGAP23	ARHGAP23	ARHGAP23	chr17:36584719-36668628	OK	53.5974	30.5896	-0.809121	-5.64078	5e-05	0.000373901	yes		0.570729
ARHGAP24	ARHGAP24	ARHGAP24	chr4:86396283-86923823	OK	13.9294	13.8794	-0.00519167	-0.0433133	0.94175	0.970095	no		0.996408
ARHGAP25	ARHGAP25	ARHGAP25	chr2:68961912-69053957	NOTEST	0.135466	0.0883306	-0.61695	0	1	1	no		0.652048
ARHGAP26	ARHGAP26	ARHGAP26	chr5:142150291-142608572	OK	4.78855	4.99396	0.0605953	0.47855	0.4093	0.58551	no		1.0429
ARHGAP26-AS1	ARHGAP26-AS1	ARHGAP26-AS1	chr5:142150291-142608572	NOTEST	0	0	0	0	1	1	no		1
ARHGAP26-IT1	ARHGAP26-IT1	ARHGAP26-IT1	chr5:142150291-142608572	NOTEST	0	0	0	0	1	1	no		1
ARHGAP27	ARHGAP27	ARHGAP27	chr17_ctg5_hap1:86403-125407	OK	6.51027	8.3496	0.35899	2.37971	5e-05	0.000373901	yes		1.28253
ARHGAP28	ARHGAP28	ARHGAP28	chr18:6834431-6915712	NOTEST	0.0193267	0.00710748	-1.44319	0	1	1	no		0.367753
ARHGAP29	ARHGAP29	ARHGAP29	chr1:94634462-94703307	OK	38.3931	28.1096	-0.449781	-3.15364	5e-05	0.000373901	yes		0.732154
ARHGAP30	ARHGAP30	ARHGAP30	chr1:161016731-161039760	NOTEST	0.303345	0.300261	-0.0147438	0	1	1	no		0.989832
ARHGAP31	ARHGAP31	ARHGAP31	chr3:119013219-119138323	OK	7.07047	6.6977	-0.0781385	-0.645043	0.26005	0.434501	no		0.947279
ARHGAP31-AS1	ARHGAP31-AS1	ARHGAP31-AS1	chr3:119013219-119138323	NOTEST	0.353268	0.293162	-0.269067	0	1	1	no		0.829856
ARHGAP32	ARHGAP32	ARHGAP32	chr11:128834954-129062093	OK	1.70057	1.54044	-0.142676	-0.907517	0.1105	0.235262	no		0.905837
ARHGAP33	ARHGAP33	ARHGAP33	chr19:36266416-36279724	OK	2.43779	2.2243	-0.132219	-0.699808	0.22515	0.391953	no		0.912427
ARHGAP35	ARHGAP35	ARHGAP35	chr19:47421932-47508333	OK	13.1642	14.4919	0.138627	0.947414	0.09565	0.210763	no		1.10086
ARHGAP36	ARHGAP36	ARHGAP36	chrX:130192215-130223859	NOTEST	0	0	0	0	1	1	no		1
ARHGAP39	ARHGAP39	ARHGAP39	chr8:145754562-145911197	OK	5.16335	6.30564	0.288333	2.0729	0.0002	0.00128915	yes		1.22123
ARHGAP4	ARHGAP4	ARHGAP4	chrX:153172829-153191714	OK	28.8225	29.1442	0.0160122	0.131638	0.81825	0.900778	no		1.01116
ARHGAP40	ARHGAP40	ARHGAP40	chr20:37230576-37279295	NOTEST	0.217441	0.151599	-0.520367	0	1	1	no		0.697194
ARHGAP42	ARHGAP42	ARHGAP42	chr11:100558406-100861656	OK	2.73391	3.17227	0.214553	1.29614	0.02325	0.0711652	no		1.16034
ARHGAP44	ARHGAP44	ARHGAP44	chr17:12569206-12921381	NOTEST	0.0171123	0.0229489	0.423396	0	1	1	no		1.34108
ARHGAP5	ARHGAP5	ARHGAP5	chr14:32546494-32628934	OK	9.80494	12.4616	0.34591	2.52306	5e-05	0.000373901	yes		1.27095
ARHGAP5-AS1	ARHGAP5-AS1	ARHGAP5-AS1	chr14:32544624-32545905	OK	3.79708	5.71932	0.590954	2.49528	5e-05	0.000373901	yes		1.50624
ARHGAP6	ARHGAP6	ARHGAP6	chrX:11155662-11683821	NOTEST	0.0045709	0	#NAME?	0	1	1	no		#NAME?
ARHGAP8	ARHGAP8	ARHGAP8	chr22:45064426-45258664	NOTEST	0.0126115	0.0136962	0.119041	0	1	1	no		1.08601
ARHGAP9	ARHGAP9	ARHGAP9	chr12:57853917-57873633	NOTEST	0.140906	0.116282	-0.277113	0	1	1	no		0.825241
ARHGDIA	ARHGDIA	ARHGDIA	chr17:79825594-79829282	OK	234.301	217.688	-0.106107	-0.744948	0.19845	0.358173	no		0.929092
ARHGDIB	ARHGDIB	ARHGDIB	chr12:15094949-15114562	OK	313.627	282.542	-0.150581	-1.05701	0.06615	0.159513	no		0.900888
ARHGDIG	ARHGDIG	ARHGDIG	chr16:330605-333003	NOTEST	0	0.0299167	inf	0	1	1	no		#VALUE!
ARHGEF1	ARHGEF1	ARHGEF1	chr19:42387266-42411604	OK	32.654	25.0286	-0.383683	-2.87245	5e-05	0.000373901	yes		0.766478
ARHGEF10	ARHGEF10	ARHGEF10	chr8:1772141-1906807	OK	17.777	15.5813	-0.190194	-1.50225	0.00955	0.034543	yes		0.876488
ARHGEF10L	ARHGEF10L	ARHGEF10L	chr1:17866329-18024370	OK	1.48552	1.07158	-0.471228	-1.98161	0.00035	0.00210017	yes		0.72135
ARHGEF11	ARHGEF11	ARHGEF11	chr1:156904631-157015162	OK	9.78437	9.33992	-0.0670698	-0.564097	0.3273	0.508492	no		0.954575
ARHGEF12	ARHGEF12	ARHGEF12	chr11:120207617-120360645	OK	18.4918	19.4898	0.0758361	0.527933	0.3619	0.542501	no		1.05397
ARHGEF15	ARHGEF15	ARHGEF15	chr17:8213555-8225834	OK	3.56976	3.0291	-0.236934	-1.41787	0.01225	0.0423365	yes		0.848547
ARHGEF16	ARHGEF16	ARHGEF16	chr1:3371146-3397677	NOTEST	0.0512121	0.00839182	-2.60943	0	1	1	no		0.163864
ARHGEF17	ARHGEF17	ARHGEF17	chr11:73019662-73080425	OK	17.6388	20.8719	0.242807	1.67273	0.003	0.0133368	yes		1.18329
ARHGEF18	ARHGEF18	ARHGEF18	chr19:7459998-7537371	OK	11.4591	9.8215	-0.222476	-1.83944	0.00155	0.00762175	yes		0.857093
ARHGEF19	ARHGEF19	ARHGEF19	chr1:16524598-16539104	OK	2.59038	2.34806	-0.141697	-0.682676	0.22965	0.39778	no		0.906452
ARHGEF2	ARHGEF2	ARHGEF2	chr1:155916629-155948336	OK	29.8513	25.9747	-0.200684	-1.37017	0.0163	0.0536182	no		0.870138
ARHGEF25	ARHGEF25	ARHGEF25	chr12:58003962-58011028	OK	8.9929	10.1986	0.181518	1.2372	0.03115	0.0896049	no		1.13408
ARHGEF26	ARHGEF26	ARHGEF26	chr3:153742189-153975616	NOTEST	0.428397	0.488494	0.189392	0	1	1	no		1.14028
ARHGEF26-AS1	ARHGEF26-AS1	ARHGEF26-AS1	chr3:153742189-153975616	NOTEST	0.0210868	0	#NAME?	0	1	1	no		#NAME?
ARHGEF28	ARHGEF28	ARHGEF28	chr5:72921982-73237818	OK	25.1053	23.5246	-0.0938211	-0.63898	0.26905	0.444575	no		0.937038
ARHGEF3	ARHGEF3	ARHGEF3	chr3:56761445-57113336	OK	5.41087	6.84686	0.339582	2.29456	5e-05	0.000373901	yes		1.26539
ARHGEF3-AS1	ARHGEF3-AS1	ARHGEF3-AS1	chr3:56761445-57113336	NOTEST	0	0	0	0	1	1	no		1
ARHGEF33	ARHGEF33	ARHGEF33	chr2:39146503-39202590	NOTEST	0.122943	0.0993087	-0.307995	0	1	1	no		0.807764
ARHGEF34P	ARHGEF34P	ARHGEF34P	chr7:143883175-144077725	NOTEST	0	0	0	0	1	1	no		1
ARHGEF35	ARHGEF35	ARHGEF35	chr7:143883175-144077725	NOTEST	0	0	0	0	1	1	no		1
ARHGEF37	ARHGEF37	ARHGEF37	chr5:148961134-149014527	OK	4.37602	5.52647	0.336737	2.35887	5e-05	0.000373901	yes		1.2629
ARHGEF38	ARHGEF38	ARHGEF38	chr4:106473776-106602070	NOTEST	0.00655229	0.00784325	0.259452	0	1	1	no		1.19702
ARHGEF38-IT1	ARHGEF38-IT1	ARHGEF38-IT1	chr4:106473776-106602070	NOTEST	0	0	0	0	1	1	no		1
ARHGEF39	ARHGEF39	ARHGEF39	chr9:35658286-35665278	OK	0.909163	0.957107	0.0741415	0.218757	0.7057	0.827012	no		1.05273
ARHGEF4	ARHGEF4	ARHGEF4	chr2:131674223-131804826	NOTEST	0.00497207	0	#NAME?	0	1	1	no		#NAME?
ARHGEF40	ARHGEF40	ARHGEF40	chr14:21484921-21572863	OK	7.45673	6.1661	-0.274185	-1.59469	0.0048	0.0197159	yes		0.826917
ARHGEF5	ARHGEF5	ARHGEF5	chr7:143883175-144077725	NOTEST	0.0201029	0	#NAME?	0	1	1	no		#NAME?
ARHGEF6	ARHGEF6	ARHGEF6	chrX:135747711-135863503	NOTEST	0.0333683	0.0072754	-2.19738	0	1	1	no		0.218033
ARHGEF7	ARHGEF7	ARHGEF7	chr13:111766158-111958081	OK	7.45318	5.95568	-0.323591	-2.44207	5e-05	0.000373901	yes		0.799078
ARHGEF7-AS1	ARHGEF7-AS1	ARHGEF7-AS1	chr13:111766158-111958081	NOTEST	0	0	0	0	1	1	no		1
ARHGEF7-AS2	ARHGEF7-AS2	ARHGEF7-AS2	chr13:111766158-111958081	NOTEST	0	0	0	0	1	1	no		1
ARHGEF9	ARHGEF9	ARHGEF9	chrX:62854847-63005426	OK	4.79301	4.96067	0.0496052	0.356559	0.53215	0.694814	no		1.03498
ARHGEF9-IT1	ARHGEF9-IT1	ARHGEF9-IT1	chrX:62854847-63005426	NOTEST	0	0	0	0	1	1	no		1
ARID1A	ARID1A	ARID1A	chr1:27022521-27108601	OK	14.7953	10.7196	-0.464886	-3.4063	5e-05	0.000373901	yes		0.724528
ARID1B	ARID1B	ARID1B	chr6:157099063-157531913	OK	6.11645	6.45394	0.0774869	0.647256	0.2584	0.432668	no		1.05518
ARID2	ARID2	ARID2	chr12:46123619-46301819	OK	3.11786	3.26577	0.0668665	0.484524	0.3961	0.572288	no		1.04744
ARID3A	ARID3A	ARID3A	chr19:926036-972803	OK	5.12962	4.17622	-0.296655	-1.7376	0.0025	0.0113871	yes		0.814138
ARID3B	ARID3B	ARID3B	chr15:74833517-74890472	OK	1.85796	1.21736	-0.609969	-2.7347	5e-05	0.000373901	yes		0.655211
ARID3C	ARID3C	ARID3C	chr9:34621454-34628011	NOTEST	0	0.0142708	inf	0	1	1	no		#VALUE!
ARID4A	ARID4A	ARID4A	chr14:58765221-58840451	OK	4.06626	4.19073	0.0434963	0.304861	0.59495	0.745247	no		1.03061
ARID4B	ARID4B	ARID4B	chr1:235330209-235491532	OK	9.88035	11.7249	0.246948	2.0933	0.00035	0.00210017	yes		1.18669
ARID5A	ARID5A	ARID5A	chr2:97202463-97218371	OK	2.05261	1.58204	-0.375681	-1.38286	0.01725	0.056119	no		0.770742
ARID5B	ARID5B	ARID5B	chr10:63661012-63856707	OK	0.435865	0.680251	0.642187	2.38439	0.0001	0.000697417	yes		1.56069
ARIH1	ARIH1	ARIH1	chr15:72766666-72878896	OK	16.576	18.0054	0.119334	1.04309	0.06885	0.16449	no		1.08623
ARIH2	ARIH2	ARIH2	chr3:48955220-49022971	OK	16.1199	15.27	-0.0781441	-0.654941	0.25965	0.434066	no		0.947275
ARIH2OS	ARIH2OS	ARIH2OS	chr3:48955220-49022971	NOTEST	0.172996	0.266973	0.625954	0	1	1	no		1.54323
ARL1	ARL1	ARL1	chr12:101786897-101801598	OK	25.8088	25.963	0.00859636	0.074453	0.89935	0.947322	no		1.00598
ARL10	ARL10	ARL10	chr5:175792501-175800503	NOTEST	0.0229166	0	#NAME?	0	1	1	no		#NAME?
ARL11	ARL11	ARL11	chr13:50202434-50208008	NOTEST	0	0.0106201	inf	0	1	1	no		#VALUE!
ARL13A	ARL13A	ARL13A	chrX:100224696-100245820	OK	4.76633	4.68629	-0.0244317	-0.105533	0.8565	0.923462	no		0.983208
ARL13B	ARL13B	ARL13B	chr3:93698982-93774522	OK	4.20654	4.60317	0.129993	0.83473	0.14565	0.288076	no		1.09429
ARL14	ARL14	ARL14	chr3:160394947-160396235	NOTEST	0.138636	0.0635961	-1.12429	0	1	1	no		0.458728
ARL14EP	ARL14EP	ARL14EP	chr11:30344645-30359770	OK	12.5858	14.2943	0.183642	1.36244	0.0172	0.0560003	no		1.13575
ARL14EPL	ARL14EPL	ARL14EPL	chr5:115387162-115394827	NOTEST	0.190885	0.318357	0.737942	0	1	1	no		1.6678
ARL15	ARL15	ARL15	chr5:53180613-53606403	OK	2.99481	3.26757	0.125754	0.612441	0.2892	0.46615	no		1.09108
ARL16	ARL16	ARL16	chr17:79648223-79650954	OK	22.1922	24.4358	0.138942	0.983632	0.0853	0.193589	no		1.1011
ARL17A	ARL17A	ARL17A	chr17_ctg5_hap1:1450905-1513884	NOTEST	1.13421	1.24753	2.10086	0	1	1	no		4.28965
ARL17B	ARL17B	ARL17B	chr17_ctg5_hap1:195720-462618	NOTEST	0.280237	0	#NAME?	0	1	1	no		#NAME?
ARL2	ARL2	ARL2	chr11:64781584-64808044	OK	166.373	135.187	-0.299468	-1.88229	0.00095	0.00501059	yes		0.812552
ARL2-SNX15	ARL2-SNX15	ARL2-SNX15	chr11:64781584-64808044	NOTEST	0.0808536	0.0625181	-0.371039	0	1	1	no		0.773225
ARL2BP	ARL2BP	ARL2BP	chr16:57279037-57287545	OK	48.6261	49.5935	0.0284175	0.206588	0.71095	0.830578	no		1.01989
ARL3	ARL3	ARL3	chr10:104433483-104474190	OK	6.61361	7.11891	0.106219	0.762114	0.18195	0.338172	no		1.0764
ARL4A	ARL4A	ARL4A	chr7:12726451-12730558	OK	7.24594	9.78399	0.433249	3.05142	5e-05	0.000373901	yes		1.35027
ARL4C	ARL4C	ARL4C	chr2:235401685-235405697	OK	3.41823	3.024	-0.176792	-1.03752	0.06795	0.162716	no		0.884668
ARL4D	ARL4D	ARL4D	chr17:41476352-41478504	OK	10.6199	9.81049	-0.114372	-0.706328	0.2172	0.382022	no		0.923784
ARL5A	ARL5A	ARL5A	chr2:152657479-152685009	OK	9.95823	9.50443	-0.0672892	-0.488923	0.39935	0.57531	no		0.95443
ARL5B	ARL5B	ARL5B	chr10:18948312-18966940	OK	8.36979	8.24215	-0.0221709	-0.163154	0.77825	0.878307	no		0.98475
ARL5C	ARL5C	ARL5C	chr17:37313146-37322414	NOTEST	0	0	0	0	1	1	no		1
ARL6	ARL6	ARL6	chr3:97483364-97520086	OK	4.24275	4.15726	-0.0293677	-0.131806	0.8114	0.896894	no		0.97985
ARL6IP1	ARL6IP1	ARL6IP1	chr16:18802990-18812857	OK	50.1459	23.9284	-1.06741	-7.8829	5e-05	0.000373901	yes		0.477175
ARL6IP4	ARL6IP4	ARL6IP4	chr12:123464606-123467460	OK	83.1303	80.5268	-0.045906	-0.305841	0.59805	0.747685	no		0.968681
ARL6IP5	ARL6IP5	ARL6IP5	chr3:69134089-69155239	OK	96.5482	128.092	0.407858	2.84145	5e-05	0.000373901	yes		1.32671
ARL6IP6	ARL6IP6	ARL6IP6	chr2:153574406-153617767	OK	8.77542	7.64878	-0.198239	-1.28544	0.0249	0.0749413	no		0.871614
ARL8A	ARL8A	ARL8A	chr1:202102531-202113871	OK	17.3389	15.5371	-0.158288	-1.15592	0.04245	0.113734	no		0.896088
ARL8B	ARL8B	ARL8B	chr3:5163929-5222601	OK	61.6608	60.259	-0.0331775	-0.229677	0.68515	0.812165	no		0.977266
ARL9	ARL9	ARL9	chr4:57371374-57390058	NOTEST	0.0263729	0	#NAME?	0	1	1	no		#NAME?
ARMC1	ARMC1	ARMC1	chr8:66514690-66546452	OK	10.2572	9.18597	-0.159126	-1.16441	0.03835	0.105337	no		0.895567
ARMC10	ARMC10	ARMC10	chr7:102715327-102789569	OK	15.333	15.8081	0.0440177	0.296749	0.59675	0.746573	no		1.03098
ARMC12	ARMC12	ARMC12	chr6:35704808-35716690	OK	1.03135	2.29325	1.15286	2.45394	5e-05	0.000373901	yes		2.22354
ARMC2	ARMC2	ARMC2	chr6:109169618-109295675	OK	1.13354	1.3541	0.256506	1.01446	0.0745	0.174861	no		1.19458
ARMC2-AS1	ARMC2-AS1	ARMC2-AS1	chr6:109169618-109295675	NOTEST	0.068633	0.0280354	-1.29165	0	1	1	no		0.408484
ARMC3	ARMC3	ARMC3	chr10:23216952-23327452	NOTEST	0	0	0	0	1	1	no		1
ARMC4	ARMC4	ARMC4	chr10:28101092-28287984	OK	1.90797	1.30433	-0.548722	-2.25031	5e-05	0.000373901	yes		0.683625
ARMC5	ARMC5	ARMC5	chr16:31469593-31478488	OK	4.98857	5.39829	0.113877	0.745726	0.18925	0.34726	no		1.08213
ARMC6	ARMC6	ARMC6	chr19:19144386-19168987	OK	24.2189	24.1903	-0.00170446	-0.0139996	0.97955	0.989147	no		0.998819
ARMC7	ARMC7	ARMC7	chr17:73106046-73127890	OK	7.52721	6.88409	-0.128849	-0.611363	0.28505	0.461437	no		0.914561
ARMC8	ARMC8	ARMC8	chr3:137906089-138048728	OK	12.4385	6.72599	-0.886992	-6.63477	5e-05	0.000373901	yes		0.54074
ARMC9	ARMC9	ARMC9	chr2:232063259-232240590	OK	8.0731	8.11989	0.0083375	0.0519134	0.9307	0.963352	no		1.0058
ARMCX1	ARMCX1	ARMCX1	chrX:100805513-100809675	OK	12.9754	13.0971	0.0134667	0.096745	0.8685	0.929542	no		1.00938
ARMCX2	ARMCX2	ARMCX2	chrX:100910267-100914876	NOTEST	0.154455	0.101228	-0.609579	0	1	1	no		0.655388
ARMCX3	ARMCX3	ARMCX3	chrX:100878119-100882831	OK	54.7256	62.6483	0.195059	1.35761	0.0171	0.0557478	no		1.14477
ARMCX4	ARMCX4	ARMCX4	chrX:100673250-100790975	OK	1.8173	1.7044	-0.0925376	-0.491965	0.38795	0.565379	no		0.937872
ARMCX5	ARMCX5	ARMCX5	chrX:101854095-101972661	OK	10.1972	10.3021	0.0147757	0.0850568	0.882	0.936913	no		1.01029
ARMCX5-GPRASP2	ARMCX5-GPRASP2,GPRASP2	ARMCX5-GPRASP2,GPRASP2	chrX:101854095-101972661	OK	2.4276	2.36605	-0.0370494	-0.098193	0.86285	0.927036	no		0.974646
ARMCX6	ARMCX6	ARMCX6	chrX:100870107-100872991	OK	78.0355	94.7065	0.279333	1.92939	0.00185	0.00885846	yes		1.21363
ARMS2	ARMS2	ARMS2	chr10:124214178-124216868	NOTEST	0.0293569	0.0532864	0.860068	0	1	1	no		1.81512
ARMT1	ARMT1	ARMT1	chr6:151773392-151791234	OK	15.6898	17.6074	0.166357	1.31055	0.022	0.0681281	no		1.12222
ARNT	ARNT	ARNT	chr1:150782180-150849244	OK	9.91405	10.1958	0.0404214	0.325582	0.5687	0.724792	no		1.02841
ARNT2	ARNT2	ARNT2	chr15:80696691-80890277	NOTEST	0.0324785	0.0344917	0.0867634	0	1	1	no		1.06199
ARNTL	ARNTL	ARNTL	chr11:13299273-13408812	OK	3.54393	4.37915	0.3053	1.69305	0.0028	0.012551	yes		1.23568
ARNTL2	ARNTL2	ARNTL2	chr12:27485786-27599567	OK	9.64294	6.01542	-0.680808	-5.64546	5e-05	0.000373901	yes		0.623816
ARNTL2-AS1	ARNTL2-AS1	ARNTL2-AS1	chr12:27485786-27599567	NOTEST	0.0273321	0	#NAME?	0	1	1	no		#NAME?
ARPC1A	ARPC1A	ARPC1A	chr7:98923495-98963885	OK	127.876	122.236	-0.0650744	-0.451044	0.42965	0.603834	no		0.955896
ARPC1B	ARPC1B	ARPC1B	chr7:98972297-99006305	OK	273.744	268.813	-0.0262205	-0.164737	0.76785	0.871638	no		0.981989
ARPC2	ARPC2	ARPC2	chr2:219081816-219119071	OK	134.006	146.043	0.124095	0.862476	0.13325	0.270574	no		1.08982
ARPC3	ARPC3	ARPC3	chr12:110872694-110888216	OK	321.741	337.108	0.0673106	0.470005	0.4082	0.584606	no		1.04776
ARPC4	ARPC4	ARPC4	chr3:9821647-9878040	OK	137.453	138.062	0.00637059	0.0324013	0.9524	0.97557	no		1.00443
ARPC4-TTLL3	ARPC4-TTLL3	ARPC4-TTLL3	chr3:9821647-9878040	OK	8.40783	8.19932	-0.0362298	-0.074311	0.89795	0.94657	no		0.9752
ARPC5	ARPC5	ARPC5	chr1:183595327-183605076	OK	87.3121	92.2295	0.0790462	0.547222	0.3403	0.522545	no		1.05632
ARPC5L	ARPC5L	ARPC5L	chr9:127631483-127639696	OK	52.4033	54.9277	0.0678764	0.545832	0.3458	0.527793	no		1.04817
ARPIN	ARPIN	ARPIN	chr15:90373830-90456222	OK	6.95316	6.16147	-0.174393	-0.651668	0.25135	0.423842	no		0.88614
ARPP19	ARPP19	ARPP19	chr15:52839241-52861643	OK	30.5663	26.8857	-0.185104	-1.28071	0.028	0.0821611	no		0.879586
ARPP21	ARPP21	ARPP21	chr3:35680665-35835988	NOTEST	0	0	0	0	1	1	no		1
ARR3	ARR3	ARR3	chrX:69488184-69501690	NOTEST	0	0.0133893	inf	0	1	1	no		#VALUE!
ARRB1	ARRB1	ARRB1	chr11:74971165-75062875	OK	7.16965	10.3696	0.532387	4.4676	5e-05	0.000373901	yes		1.44632
ARRB2	ARRB2	ARRB2	chr17:4613788-4624795	OK	30.6882	30.4225	-0.0125447	-0.102998	0.85535	0.922865	no		0.991342
ARRDC1	ARRDC1	ARRDC1	chr9:140500095-140513347	OK	50.2915	34.7672	-0.532587	-4.1354	5e-05	0.000373901	yes		0.691314
ARRDC1-AS1	ARRDC1-AS1	ARRDC1-AS1	chr9:140500095-140513347	OK	9.14453	7.44031	-0.297545	-0.82159	0.1525	0.29769	no		0.813636
ARRDC2	ARRDC2	ARRDC2	chr19:18111940-18124911	OK	18.2696	15.3006	-0.255854	-2.00516	0.0006	0.00337069	yes		0.837491
ARRDC3	ARRDC3	ARRDC3	chr5:90664540-90716532	OK	10.516	11.2982	0.103511	0.822993	0.14665	0.289501	no		1.07438
ARRDC3-AS1	ARRDC3-AS1	ARRDC3-AS1	chr5:90664540-90716532	NOTEST	0.221282	0.227355	0.0390657	0	1	1	no		1.02745
ARRDC4	ARRDC4	ARRDC4	chr15:98503932-98517068	NOTEST	0.00475343	0	#NAME?	0	1	1	no		#NAME?
ARRDC5	ARRDC5	ARRDC5	chr19:4890448-4902879	NOTEST	0	0	0	0	1	1	no		1
ARSA	ARSA	ARSA	chr22:51061181-51066601	OK	13.4394	13.6044	0.0176101	0.145522	0.8011	0.890796	no		1.01228
ARSB	ARSB	ARSB	chr5:78073036-78282357	OK	5.48807	5.40868	-0.0210208	-0.146483	0.80045	0.890607	no		0.985535
ARSD	ARSD	ARSD	chrX:2822010-2847416	OK	5.35316	7.81322	0.545528	4.11277	5e-05	0.000373901	yes		1.45955
ARSE	ARSE	ARSE	chrX:2852672-2886351	OK	1.74557	2.59349	0.571199	2.22537	5e-05	0.000373901	yes		1.48576
ARSF	ARSF	ARSF	chrX:2958274-3030770	NOTEST	0	0.00761987	inf	0	1	1	no		#VALUE!
ARSG	ARSG	ARSG	chr17:66255322-66597095	OK	3.70791	5.50583	0.570356	0.561447	0.32535	0.506222	no		1.48489
ARSH	ARSH	ARSH	chrX:2924653-2951426	NOTEST	0	0	0	0	1	1	no		1
ARSI	ARSI	ARSI	chr5:149675908-149682525	NOTEST	0.0123698	0	#NAME?	0	1	1	no		#NAME?
ARSJ	ARSJ	ARSJ	chr4:114821439-114900878	OK	8.90618	7.80866	-0.189731	-1.47666	0.0094	0.0341796	yes		0.876769
ARSK	ARSK	ARSK	chr5:94890824-94940806	OK	11.2499	11.2679	0.00230437	0.0177449	0.97365	0.986326	no		1.0016
ART1	ART1	ART1	chr11:3666360-3685646	NOTEST	0.0302967	0.0201634	-0.587424	0	1	1	no		0.66553
ART3	ART3	ART3	chr4:76932332-77033955	NOTEST	0.0261109	0.0279661	0.0990261	0	1	1	no		1.07105
ART4	ART4	ART4	chr12:14982244-14996413	NOTEST	0	0.0281901	inf	0	1	1	no		#VALUE!
ART5	ART5	ART5	chr11:3659735-3663546	NOTEST	0	0	0	0	1	1	no		1
ARTN	ARTN	ARTN	chr1:44398991-44402912	NOTEST	0.162296	0.442511	1.44708	0	1	1	no		2.72656
ARV1	ARV1	ARV1	chr1:231114822-231136479	OK	7.04597	5.9631	-0.240736	-1.23122	0.03365	0.0951438	no		0.846313
ARVCF	ARVCF	ARVCF	chr22:19863040-20004309	OK	4.28133	5.12954	0.260771	0.567971	0.32905	0.51019	no		1.19812
ARX	ARX	ARX	chrX:25021812-25034065	NOTEST	0	0	0	0	1	1	no		1
AS3MT	AS3MT	AS3MT	chr10:104613966-104661655	NOTEST	1.73434e-05	1.06095e-05	-0.709031	0	1	1	no		0.611731
ASAH1	ASAH1	ASAH1	chr8:17913924-17955160	OK	24.8284	21.9785	-0.175899	-1.45523	0.0107	0.037897	yes		0.885216
ASAH2	ASAH2	ASAH2	chr10:51946999-52008370	NOTEST	0.129282	0.0600536	-1.1062	0	1	1	no		0.464516
ASAH2B	ASAH2B	ASAH2B	chr10:52499687-52514569	NOTEST	0.216975	0.345147	0.669685	0	1	1	no		1.59073
ASAP1	ASAP1	ASAP1	chr8:131064350-131455906	OK	61.6389	65.6465	0.0908762	0.641067	0.2634	0.438212	no		1.06502
ASAP1-IT1	ASAP1-IT1	ASAP1-IT1	chr8:131064350-131455906	NOTEST	0	0	0	0	1	1	no		1
ASAP1-IT2	ASAP1-IT2	ASAP1-IT2	chr8:131064350-131455906	NOTEST	0.0277065	0.00817847	-1.76032	0	1	1	no		0.295183
ASAP2	ASAP2	ASAP2	chr2:9346893-9545812	OK	21.2719	18.0072	-0.240368	-1.62711	0.00425	0.0178282	yes		0.846529
ASAP3	ASAP3	ASAP3	chr1:23755055-23810750	OK	8.79849	9.56745	0.120879	0.933397	0.0976	0.214072	no		1.0874
ASB1	ASB1	ASB1	chr2:239335625-239360891	OK	2.96724	1.61179	-0.880459	-5.38078	5e-05	0.000373901	yes		0.543195
ASB10	ASB10	ASB10	chr7:150872784-150884919	NOTEST	0	0	0	0	1	1	no		1
ASB11	ASB11	ASB11	chrX:15299830-15333746	NOTEST	0.0210954	0.101672	2.26892	0	1	1	no		4.81962
ASB12	ASB12	ASB12	chrX:63444071-63450511	NOTEST	0	0	0	0	1	1	no		1
ASB13	ASB13	ASB13	chr10:5680819-5708558	OK	4.18028	3.66257	-0.19074	-1.02975	0.06925	0.16516	no		0.876156
ASB14	ASB14	ASB14	chr3:57261764-57326710	NOTEST	0.176529	0.179658	0.0253469	0	1	1	no		1.01772
ASB15	ASB15	ASB15	chr7:123241920-123277934	NOTEST	0	0	0	0	1	1	no		1
ASB16	ASB16	ASB16	chr17:42248073-42264085	OK	1.29046	1.21349	-0.0887164	-0.165999	0.77505	0.87688	no		0.940359
ASB16-AS1	ASB16-AS1	ASB16-AS1	chr17:42248073-42264085	OK	6.70681	7.24415	0.111191	0.511172	0.3723	0.552028	no		1.08012
ASB17	ASB17	ASB17	chr1:76384557-76398116	NOTEST	0	0	0	0	1	1	no		1
ASB18	ASB18	ASB18	chr2:237103514-237172988	NOTEST	0	0	0	0	1	1	no		1
ASB2	ASB2	ASB2	chr14:94400498-94443076	NOTEST	0.0200042	0	#NAME?	0	1	1	no		#NAME?
ASB3	ASB3	ASB3	chr2:53897116-54087170	OK	3.99495	3.93518	-0.0217484	-0.0320075	0.95575	0.976907	no		0.985038
ASB4	ASB4	ASB4	chr7:95115212-95169543	NOTEST	0.0101405	0	#NAME?	0	1	1	no		#NAME?
ASB5	ASB5	ASB5	chr4:177134825-177190373	NOTEST	0.0624526	0.0530097	-0.236507	0	1	1	no		0.848798
ASB6	ASB6	ASB6	chr9:132371162-132404448	OK	14.5508	13.4374	-0.114848	-0.837063	0.14635	0.289046	no		0.92348
ASB7	ASB7	ASB7	chr15:101142754-101191904	OK	6.4013	5.86941	-0.12515	-0.650565	0.2612	0.435719	no		0.916909
ASB8	ASB8	ASB8	chr12:48541571-48551377	OK	11.2177	9.1664	-0.291355	-2.07387	0.0005	0.0028739	yes		0.817134
ASB9	ASB9	ASB9	chrX:15262108-15288589	OK	6.99218	9.79639	0.486507	2.91253	5e-05	0.000373901	yes		1.40105
ASB9P1	ASB9P1	ASB9P1	chr15:93338713-93340338	NOTEST	0.0827556	0	#NAME?	0	1	1	no		#NAME?
ASCC1	ASCC1	ASCC1	chr10:73855789-73995618	OK	13.6244	16.3797	0.265713	0.998352	0.0853	0.193589	no		1.20223
ASCC2	ASCC2	ASCC2	chr22:30184596-30234293	OK	21.1835	20.2335	-0.0661903	-0.548742	0.341	0.523268	no		0.955157
ASCC3	ASCC3	ASCC3	chr6:100956070-101329248	OK	20.277	22.578	0.155074	1.02475	0.07295	0.172036	no		1.11348
ASCL1	ASCL1	ASCL1	chr12:103351451-103354294	NOTEST	0.00801702	0.00991964	0.307222	0	1	1	no		1.23732
ASCL2	ASCL2	ASCL2	chr11:2289727-2292182	NOTEST	0	0	0	0	1	1	no		1
ASCL3	ASCL3	ASCL3	chr11:8959118-8964580	NOTEST	0	0.0319966	inf	0	1	1	no		#VALUE!
ASCL4	ASCL4	ASCL4	chr12:108168161-108170421	NOTEST	0	0	0	0	1	1	no		1
ASCL5	ASCL5	ASCL5	chr1:201083080-201084500	NOTEST	0	0	0	0	1	1	no		1
ASF1A	ASF1A	ASF1A	chr6:119134611-119256327	OK	8.94688	10.6313	0.248867	1.63059	0.00385	0.016377	yes		1.18827
ASF1B	ASF1B	ASF1B	chr19:14230320-14247440	OK	4.99089	1.62554	-1.61837	-6.07461	5e-05	0.000373901	yes		0.325703
ASGR1	ASGR1	ASGR1	chr17:7076750-7082883	OK	0.802893	0.766883	-0.0662027	-0.131471	0.80775	0.894691	no		0.955149
ASGR2	ASGR2	ASGR2	chr17:7004640-7018130	NOTEST	0.0180566	0	#NAME?	0	1	1	no		#NAME?
ASH1L	ASH1L	ASH1L	chr1:155305051-155533735	OK	6.59441	6.20229	-0.0884413	-0.75408	0.19085	0.349123	no		0.940538
ASH1L-AS1	ASH1L-AS1	ASH1L-AS1	chr1:155305051-155533735	OK	0.692253	0.555738	-0.316896	-0.266524	0.64765	0.784545	no		0.802795
ASH2L	ASH2L	ASH2L	chr8:37963010-37997598	OK	13.5665	13.0388	-0.0572396	-0.444011	0.4394	0.613097	no		0.961101
ASIC1	ASIC1	ASIC1	chr12:50451419-50477405	OK	4.16398	3.36198	-0.30865	-1.87005	0.0013	0.00653208	yes		0.807397
ASIC2	ASIC2	ASIC2	chr17:31340105-32483825	NOTEST	0	0	0	0	1	1	no		1
ASIC3	ASIC3	ASIC3	chr7:150745378-150749843	OK	1.24075	1.75898	0.503533	1.66051	0.00365	0.0156549	yes		1.41768
ASIC4	ASIC4	ASIC4	chr2:220378891-220403494	NOTEST	0	0.0138845	inf	0	1	1	no		#VALUE!
ASIC5	ASIC5	ASIC5	chr4:156750880-156787425	NOTEST	0.132393	0.230897	0.802422	0	1	1	no		1.74403
ASIP	ASIP	ASIP	chr20:32848170-32857148	NOTEST	0	0	0	0	1	1	no		1
ASL	ASL	ASL	chr7:65540775-65558329	OK	27.724	29.4156	0.0854433	0.697917	0.22135	0.387183	no		1.06101
ASMT	ASMT	ASMT	chrY:1660485-1711974	NOTEST	0	0.0177417	inf	0	1	1	no		#VALUE!
ASMTL	ASMTL	ASMTL	chrY:1469423-1522655	OK	14.0868	13.8461	-0.0248651	-0.169613	0.76595	0.870675	no		0.982913
ASMTL-AS1	ASMTL-AS1	ASMTL-AS1	chrY:1469423-1522655	OK	2.79851	2.54181	-0.138805	-0.366516	0.5192	0.684097	no		0.908271
ASNA1	ASNA1	ASNA1	chr19:12848305-12859137	OK	107.067	108.021	0.0127934	0.087424	0.87355	0.932322	no		1.00891
ASNS	ASNS	ASNS	chr7:97481428-97501854	OK	5.59891	4.096	-0.450933	-2.31217	5e-05	0.000373901	yes		0.73157
ASNSD1	ASNSD1	ASNSD1	chr2:190526124-190535557	OK	16.1872	16.1724	-0.00132116	-0.0102639	0.98655	0.992624	no		0.999085
ASPA	ASPA	ASPA	chr17:3377403-3402700	NOTEST	0.0302771	0.0444235	0.553097	0	1	1	no		1.46723
ASPDH	ASPDH	ASPDH	chr19:51014856-51017947	NOTEST	0	0.29689	inf	0	1	1	no		#VALUE!
ASPG	ASPG	ASPG	chr14:104552022-104579046	NOTEST	0	0.0206236	inf	0	1	1	no		#VALUE!
ASPH	ASPH	ASPH	chr8:62200524-62627199	OK	161.689	159.269	-0.0217575	-0.151075	0.79335	0.887079	no		0.985032
ASPHD1	ASPHD1	ASPHD1	chr16:29912146-29917377	OK	5.06415	4.53637	-0.158781	-0.728064	0.2054	0.367037	no		0.895782
ASPHD2	ASPHD2	ASPHD2	chr22:26825279-26840978	NOTEST	0.25656	0.287458	0.164054	0	1	1	no		1.12043
ASPM	ASPM	ASPM	chr1:197053256-197115824	OK	0.741439	0.191675	-1.95167	-4.75642	5e-05	0.000373901	yes		0.258517
ASPN	ASPN	ASPN	chr9:95059639-95432547	NOTEST	0	0.0159301	inf	0	1	1	no		#VALUE!
ASPRV1	ASPRV1	ASPRV1	chr2:70187223-70314147	NOTEST	0.10642	0.262633	1.30329	0	1	1	no		2.46791
ASPSCR1	ASPSCR1	ASPSCR1	chr17:79935425-79975282	OK	17.1371	15.4837	-0.146371	-1.06411	0.06025	0.149106	no		0.90352
ASRGL1	ASRGL1	ASRGL1	chr11:62104773-62160887	OK	0.633997	0.207458	-1.61166	-2.21082	0.00035	0.00210017	yes		0.327222
ASS1	ASS1	ASS1	chr9:133320093-133376661	OK	25.3888	31.6127	0.316312	2.54009	5e-05	0.000373901	yes		1.24514
ASTE1	ASTE1	ASTE1	chr3:130569368-131100319	OK	3.47185	3.52041	0.0200368	0.0296024	0.9579	0.97846	no		1.01399
ASTL	ASTL	ASTL	chr2:96789588-96804175	NOTEST	0	0	0	0	1	1	no		1
ASTN1	ASTN1	ASTN1	chr1:176826440-177134040	NOTEST	0.0197302	0	#NAME?	0	1	1	no		#NAME?
ASTN2	ASTN2	ASTN2	chr9:119187503-120177317	OK	11.538	14.2703	0.306624	1.03926	0.0686	0.164019	no		1.23681
ASTN2-AS1	ASTN2-AS1	ASTN2-AS1	chr9:119187503-120177317	NOTEST	0.0109709	0	#NAME?	0	1	1	no		#NAME?
ASUN	ASUN	ASUN	chr12:27058111-27091254	OK	31.7798	36.7463	0.209489	1.5895	0.0068	0.0263288	yes		1.15628
ASXL1	ASXL1	ASXL1	chr20:30946146-31027122	OK	29.742	26.9829	-0.140461	-0.886323	0.1169	0.24548	no		0.907229
ASXL2	ASXL2	ASXL2	chr2:25962252-26101312	OK	8.95419	8.15728	-0.134474	-1.12607	0.05135	0.131808	no		0.911002
ASXL3	ASXL3	ASXL3	chr18:31158540-31327399	NOTEST	0	0	0	0	1	1	no		1
ASZ1	ASZ1	ASZ1	chr7:117003275-117067577	NOTEST	0	0	0	0	1	1	no		1
ATAD1	ATAD1	ATAD1	chr10:89512874-89577917	OK	19.2222	19.952	0.0537547	0.446152	0.4445	0.617991	no		1.03796
ATAD2	ATAD2	ATAD2	chr8:124332090-124408705	OK	5.6808	8.11613	0.514698	3.97507	5e-05	0.000373901	yes		1.4287
ATAD2B	ATAD2B	ATAD2B	chr2:23971533-24149984	OK	1.44711	1.39696	-0.0508923	-0.29037	0.61415	0.760024	no		0.965339
ATAD3A	ATAD3A	ATAD3A	chr1:1447522-1470067	OK	12.2681	13.3225	0.118957	0.860351	0.13355	0.27105	no		1.08595
ATAD3B	ATAD3B	ATAD3B	chr1:1407163-1431582	OK	3.08979	3.11804	0.0131333	0.0631326	0.9105	0.952577	no		1.00914
ATAD3C	ATAD3C	ATAD3C	chr1:1385068-1405538	NOTEST	0.00972059	0	#NAME?	0	1	1	no		#NAME?
ATAD5	ATAD5	ATAD5	chr17:29158987-29222883	NOTEST	0.487688	0.272007	-0.842316	0	1	1	no		0.557747
ATAT1	ATAT1	ATAT1	chr6_ssto_hap7:1926891-1946878	OK	3.15159	3.65926	0.21547	0.979374	0.08865	0.199154	no		1.16108
ATCAY	ATCAY	ATCAY	chr19:3708334-3987432	NOTEST	0.00380522	0.00470965	0.307641	0	1	1	no		1.23768
ATE1	ATE1	ATE1	chr10:123499935-123711480	OK	7.97024	6.73317	-0.243338	-1.86668	0.00065	0.00360914	yes		0.844788
ATE1-AS1	ATE1-AS1	ATE1-AS1	chr10:123499935-123711480	NOTEST	0.0665573	0.126483	0.92628	0	1	1	no		1.90037
ATF1	ATF1	ATF1	chr12:51157788-51214943	OK	9.94665	10.474	0.0745353	0.526073	0.3553	0.536231	no		1.05302
ATF2	ATF2	ATF2	chr2:175936977-176032934	OK	10.9768	8.97983	-0.289695	-2.26131	5e-05	0.000373901	yes		0.818075
ATF3	ATF3	ATF3	chr1:212738675-212794119	OK	5.73502	4.13064	-0.473432	-2.42395	5e-05	0.000373901	yes		0.720249
ATF4	ATF4	ATF4	chr22:39916563-39918691	OK	170.849	189.739	0.151297	1.05346	0.0654	0.158442	no		1.11057
ATF5	ATF5	ATF5	chr19:50392912-50437193	OK	25.8657	27.5384	0.0904072	0.363589	0.52515	0.688933	no		1.06467
ATF6	ATF6	ATF6	chr1:161736033-161933860	OK	14.7283	11.8052	-0.319158	-2.42368	0.0001	0.000697417	yes		0.801538
ATF6B	ATF6B	ATF6B	chr6_mcf_hap5:3462872-3475845	OK	20.1358	24.7949	0.300279	2.47808	5e-05	0.000373901	yes		1.23138
ATF7	ATF7	ATF7	chr12:53901639-54020199	OK	23.4225	24.5798	0.0695808	0.248951	0.6621	0.794661	no		1.04941
ATF7IP	ATF7IP	ATF7IP	chr12:14518565-14655869	OK	9.52545	14.442	0.600412	4.09245	5e-05	0.000373901	yes		1.51615
ATF7IP2	ATF7IP2	ATF7IP2	chr16:10479911-10577495	NOTEST	0.221793	0.220089	-0.0111301	0	1	1	no		0.992315
ATG10	ATG10	ATG10	chr5:81267843-81551216	OK	4.0102	4.11114	0.0358631	0.18786	0.743	0.85286	no		1.02517
ATG101	ATG101	ATG101	chr12:52463757-52471279	OK	55.1519	52.5874	-0.0686928	-0.580737	0.31225	0.49244	no		0.953502
ATG12	ATG12	ATG12	chr5:115163893-115177548	OK	15.4134	15.7123	0.0277098	0.23411	0.6808	0.809595	no		1.01939
ATG13	ATG13	ATG13	chr11:46638825-46697568	OK	20.1371	18.7882	-0.10003	-0.679192	0.2376	0.408136	no		0.933014
ATG14	ATG14	ATG14	chr14:55833108-55878576	OK	5.32426	4.87641	-0.126759	-0.891382	0.12115	0.251934	no		0.915887
ATG16L1	ATG16L1	ATG16L1	chr2:234160216-234204320	OK	10.2596	9.62741	-0.091754	-0.68896	0.2248	0.391674	no		0.938381
ATG16L2	ATG16L2	ATG16L2	chr11:72525450-72540680	OK	10.7528	9.65236	-0.155762	-1.05395	0.06445	0.156875	no		0.897658
ATG2A	ATG2A	ATG2A	chr11:64662003-64684722	OK	12.5338	8.21106	-0.610178	-5.1275	5e-05	0.000373901	yes		0.655116
ATG2B	ATG2B	ATG2B	chr14:96747594-96829678	OK	5.47775	3.77402	-0.537481	-4.3697	5e-05	0.000373901	yes		0.688973
ATG3	ATG3	ATG3	chr3:112251353-112280810	OK	40.2548	41.1441	0.0315278	0.259094	0.6543	0.788576	no		1.02209
ATG4A	ATG4A	ATG4A	chrX:107334898-107397901	OK	29.041	36.3169	0.322548	2.75724	5e-05	0.000373901	yes		1.25054
ATG4B	ATG4B	ATG4B	chr2:242577026-242613271	OK	10.3248	9.69439	-0.0908933	-0.661996	0.24785	0.419592	no		0.938941
ATG4C	ATG4C	ATG4C	chr1:63249776-63330941	OK	4.9203	4.28693	-0.198802	-1.15122	0.0435	0.115848	no		0.871274
ATG4D	ATG4D	ATG4D	chr19:10654569-10676702	OK	5.74669	5.41566	-0.0855926	-0.27684	0.6288	0.77139	no		0.942397
ATG5	ATG5	ATG5	chr6:106632351-106773695	OK	11.24	11.6367	0.0500361	0.382605	0.50325	0.670694	no		1.03529
ATG7	ATG7	ATG7	chr3:11314009-11762242	OK	9.92644	8.17735	-0.279643	-1.06292	0.0669	0.160853	no		0.823795
ATG9A	ATG9A	ATG9A	chr2:220084101-220094410	OK	15.1335	14.5502	-0.0567083	-0.467326	0.41945	0.59434	no		0.961455
ATG9B	ATG9B	ATG9B	chr7:150688143-150721586	OK	3.24734	1.77435	-0.871964	-1.16845	0.0435	0.115848	no		0.546403
ATHL1	ATHL1	ATHL1	chr11:289137-295688	OK	46.3117	57.6982	0.317149	2.19069	0.00015	0.00100331	yes		1.24587
ATIC	ATIC	ATIC	chr2:216176678-216214496	OK	34.0907	30.2144	-0.174142	-1.46183	0.0105	0.037327	yes		0.886294
ATL1	ATL1	ATL1	chr14:50999799-51099784	OK	0.660454	1.27744	0.951723	2.71341	5e-05	0.000373901	yes		1.93418
ATL2	ATL2	ATL2	chr2:38521098-38604432	OK	8.80648	9.88269	0.166337	1.11158	0.05555	0.140042	no		1.12221
ATL3	ATL3	ATL3	chr11:63391553-63439446	OK	21.8601	23.9146	0.129595	0.901758	0.12405	0.256761	no		1.09399
ATM	ATM	ATM	chr11:108093558-108239826	OK	10.1972	10.2369	0.00560535	0.0384663	0.9481	0.973428	no		1.00389
ATMIN	ATMIN	ATMIN	chr16:81069457-81080951	OK	15.8449	18.549	0.227319	1.9836	0.00085	0.0045508	yes		1.17066
ATN1	ATN1	ATN1	chr12:7033625-7051484	OK	50.2369	56.3536	0.165758	1.1549	0.0437	0.116256	no		1.12176
ATOH1	ATOH1	ATOH1	chr4:94750077-94751142	NOTEST	0	0	0	0	1	1	no		1
ATOH7	ATOH7	ATOH7	chr10:69990351-69991870	NOTEST	0.0507867	0.0137885	-1.88098	0	1	1	no		0.271499
ATOH8	ATOH8	ATOH8	chr2:85980908-86018506	OK	2.13895	2.5679	0.263685	1.58859	0.00485	0.0198687	yes		1.20054
ATOX1	ATOX1	ATOX1	chr5:151122382-151138210	OK	124.542	124.035	-0.00588513	-0.046071	0.9371	0.966915	no		0.995929
ATP10A	ATP10A	ATP10A	chr15:25923859-26108349	NOTEST	0.00365619	0	#NAME?	0	1	1	no		#NAME?
ATP10B	ATP10B	ATP10B	chr5:159990126-160279219	NOTEST	0	0.00205308	inf	0	1	1	no		#VALUE!
ATP10D	ATP10D	ATP10D	chr4:47487409-47595503	OK	7.56359	8.29567	0.133287	1.08997	0.0554	0.139749	no		1.09679
ATP11A	ATP11A	ATP11A	chr13:113344642-113541482	OK	2.99255	2.98599	-0.00316334	-0.0228104	0.9671	0.983007	no		0.99781
ATP11A-AS1	ATP11A-AS1	ATP11A-AS1	chr13:113344642-113541482	NOTEST	0	0	0	0	1	1	no		1
ATP11AUN	ATP11AUN	ATP11AUN	chr13:113301357-113338811	NOTEST	0	0	0	0	1	1	no		1
ATP11B	ATP11B	ATP11B	chr3:182511290-182639421	OK	8.54672	8.9854	0.0722114	0.608424	0.28925	0.46617	no		1.05133
ATP11C	ATP11C	ATP11C	chrX:138808504-138914447	OK	11.8897	12.9154	0.11938	1.02754	0.07505	0.175853	no		1.08627
ATP12A	ATP12A	ATP12A	chr13:25254548-25285923	NOTEST	0.0104363	0	#NAME?	0	1	1	no		#NAME?
ATP13A1	ATP13A1	ATP13A1	chr19:19756009-19774503	OK	30.3988	32.67	0.103953	0.709782	0.21015	0.373056	no		1.07471
ATP13A2	ATP13A2	ATP13A2	chr1:17312452-17338467	OK	39.2637	30.7595	-0.352165	-2.41192	5e-05	0.000373901	yes		0.783408
ATP13A3	ATP13A3	ATP13A3	chr3:194123402-194188968	OK	12.7852	14.2361	0.155075	1.1268	0.04625	0.121581	no		1.11348
ATP13A4	ATP13A4	ATP13A4	chr3:193116755-193273373	NOTEST	0.00944074	0.0111576	0.241061	0	1	1	no		1.18186
ATP13A4-AS1	ATP13A4-AS1	ATP13A4-AS1	chr3:193116755-193273373	NOTEST	0	0	0	0	1	1	no		1
ATP13A5	ATP13A5	ATP13A5	chr3:192992830-193096514	NOTEST	0	0	0	0	1	1	no		1
ATP13A5-AS1	ATP13A5-AS1	ATP13A5-AS1	chr3:192992830-193096514	NOTEST	0	0	0	0	1	1	no		1
ATP1A1	ATP1A1	ATP1A1	chr1:116915794-116961244	OK	454.318	461.887	0.0238374	0.169374	0.7626	0.868218	no		1.01666
ATP1A1-AS1	ATP1A1-AS1	ATP1A1-AS1	chr1:116915794-116961244	OK	0.754999	1.03938	0.461181	0.0539941	0.66	0.792967	no		1.37667
ATP1A2	ATP1A2	ATP1A2	chr1:160085519-160113374	OK	2.00444	2.40318	0.261743	1.50771	0.0088	0.0324058	yes		1.19893
ATP1A3	ATP1A3	ATP1A3	chr19:42470733-42498428	NOTEST	0.243996	0.300677	0.301357	0	1	1	no		1.2323
ATP1A4	ATP1A4	ATP1A4	chr1:160121351-160156767	NOTEST	0	0	0	0	1	1	no		1
ATP1B1	ATP1B1	ATP1B1	chr1:169075946-169429907	OK	36.0245	40.1576	0.156698	0.840658	0.13925	0.279287	no		1.11473
ATP1B2	ATP1B2	ATP1B2	chr17:7549944-7561089	NOTEST	0.0147595	0	#NAME?	0	1	1	no		#NAME?
ATP1B3	ATP1B3	ATP1B3	chr3:141595469-141645382	OK	136.349	139.305	0.0309427	0.215938	0.7053	0.827012	no		1.02168
ATP1B4	ATP1B4	ATP1B4	chrX:119495939-119517104	NOTEST	0	0	0	0	1	1	no		1
ATP2A1	ATP2A1	ATP2A1	chr16:28889808-28936532	OK	0.590184	1.07471	0.864708	1.48468	0.0098	0.0352726	yes		1.82097
ATP2A1-AS1	ATP2A1-AS1	ATP2A1-AS1	chr16:28889808-28936532	OK	1.39193	1.40045	0.00881103	0.00639372	0.9869	0.992734	no		1.00613
ATP2A2	ATP2A2	ATP2A2	chr12:110719031-110788897	OK	80.3255	77.6868	-0.0481877	-0.323802	0.56865	0.724792	no		0.96715
ATP2A3	ATP2A3	ATP2A3	chr17:3827162-3867758	NOTEST	0.296849	0.177067	-0.74543	0	1	1	no		0.59649
ATP2B1	ATP2B1	ATP2B1	chr12:89981825-90049844	OK	8.06633	8.67036	0.104179	0.86208	0.1265	0.2604	no		1.07488
ATP2B2	ATP2B2	ATP2B2	chr3:10365706-10547268	NOTEST	0.0425657	0.0125729	-1.75937	0	1	1	no		0.295377
ATP2B2-IT2	ATP2B2-IT2	ATP2B2-IT2	chr3:10667700-10668492	NOTEST	0	0	0	0	1	1	no		1
ATP2B3	ATP2B3	ATP2B3	chrX:152801579-152848387	NOTEST	0.00272199	0	#NAME?	0	1	1	no		#NAME?
ATP2B4	ATP2B4	ATP2B4	chr1:203595914-203713209	OK	27.7874	27.2696	-0.0271347	-0.190089	0.7393	0.850815	no		0.981367
ATP2C1	ATP2C1	ATP2C1	chr3:130569368-131100319	OK	42.5697	46.4579	0.126098	0.785791	0.1723	0.324953	no		1.09134
ATP2C2	ATP2C2	ATP2C2	chr16:84402128-84497793	NOTEST	0.0291843	0.0268904	-0.1181	0	1	1	no		0.9214
ATP4A	ATP4A	ATP4A	chr19:36041094-36054560	NOTEST	0	0.00448471	inf	0	1	1	no		#VALUE!
ATP4B	ATP4B	ATP4B	chr13:114303121-114312513	NOTEST	0.0542946	0.0255021	-1.09019	0	1	1	no		0.4697
ATP5A1	ATP5A1	ATP5A1	chr18:43664109-43684199	OK	170.332	167.547	-0.0237786	-0.167235	0.76975	0.87261	no		0.983653
ATP5B	ATP5B	ATP5B	chr12:57031958-57039852	OK	514.229	578.188	0.169127	1.19781	0.03405	0.0959689	no		1.12438
ATP5C1	ATP5C1	ATP5C1	chr10:7830092-7849762	OK	97.3822	81.7915	-0.251707	-1.97404	0.00105	0.00545921	yes		0.839902
ATP5D	ATP5D	ATP5D	chr19:1241748-1244824	OK	56.6695	61.5005	0.118025	0.886372	0.1245	0.257435	no		1.08525
ATP5E	ATP5E	ATP5E	chr20:57603732-57617901	OK	928.656	1019.62	0.13482	0.822875	0.1493	0.293334	no		1.09796
ATP5EP2	ATP5EP2	ATP5EP2	chr13:28519342-28519710	NOTEST	0	0	0	0	1	1	no		1
ATP5F1	ATP5F1	ATP5F1	chr1:111982511-112004525	OK	60.5767	62.0973	0.0357678	0.199575	0.7287	0.843441	no		1.0251
ATP5G1	ATP5G1	ATP5G1	chr17:46970147-46973232	OK	99.9563	100.783	0.0118787	0.0935632	0.87105	0.930694	no		1.00827
ATP5G2	ATP5G2	ATP5G2	chr12:54058943-54070512	OK	391.029	356.674	-0.132669	-0.926236	0.10745	0.229991	no		0.912142
ATP5G3	ATP5G3	ATP5G3	chr2:176040985-176046490	OK	46.4719	48.4173	0.059165	0.403598	0.48275	0.651762	no		1.04186
ATP5H	ATP5H	ATP5H	chr17:73028661-73061984	OK	212.767	219.848	0.0472278	0.264599	0.64145	0.779823	no		1.03328
ATP5I	ATP5I	ATP5I	chr4:666224-668127	OK	219.672	241.552	0.136982	1.09216	0.05495	0.138839	no		1.0996
ATP5J	ATP5J	ATP5J	chr21:27096790-27144771	OK	63.8508	64.106	0.00575375	0.0320825	0.95435	0.976308	no		1.004
ATP5J2	ATP5J2	ATP5J2	chr7:99006600-99063824	OK	142.381	156.089	0.132612	0.53097	0.3618	0.542482	no		1.09628
ATP5J2-PTCD1	ATP5J2-PTCD1	ATP5J2-PTCD1	chr7:99006600-99063824	NOTEST	0.319549	0.148237	-1.10813	0	1	1	no		0.463895
ATP5L	ATP5L	ATP5L	chr11:118230295-118289530	OK	88.828	87.4811	-0.0220446	-0.112753	0.84315	0.916413	no		0.984836
ATP5L2	ATP5L2	ATP5L2	chr22:43013845-43045405	NOTEST	0	0.0243465	inf	0	1	1	no		#VALUE!
ATP5O	ATP5O	ATP5O	chr21:35275756-35288158	OK	133.657	129.887	-0.0412792	-0.358746	0.5279	0.691227	no		0.971793
ATP5S	ATP5S	ATP5S	chr14:50779046-50792946	OK	4.84751	4.10619	-0.239445	-1.14607	0.04485	0.118705	no		0.847071
ATP5SL	ATP5SL	ATP5SL	chr19:41937222-41945843	OK	40.2203	39.2278	-0.0360471	-0.298127	0.60405	0.752056	no		0.975324
ATP6AP1	ATP6AP1	ATP6AP1	chrX:153656977-153664863	OK	136.437	152.839	0.163779	1.14737	0.0457	0.120569	no		1.12022
ATP6AP1L	ATP6AP1L	ATP6AP1L	chr5:81575280-81614465	NOTEST	0.53747	0.488565	-0.137636	0	1	1	no		0.909007
ATP6AP2	ATP6AP2	ATP6AP2	chrX:40440215-40465888	OK	118.959	123.71	0.0564936	0.394084	0.48645	0.655052	no		1.03994
ATP6V0A1	ATP6V0A1	ATP6V0A1	chr17:40610861-40674597	OK	26.6713	24.2603	-0.136689	-0.959755	0.09395	0.207976	no		0.909604
ATP6V0A2	ATP6V0A2	ATP6V0A2	chr12:124196864-124246301	OK	4.47562	4.26756	-0.0686761	-0.503456	0.379	0.558231	no		0.953513
ATP6V0A4	ATP6V0A4	ATP6V0A4	chr7:138391038-138490769	OK	1.48013	1.37833	-0.102801	-0.377978	0.501	0.668628	no		0.931223
ATP6V0B	ATP6V0B	ATP6V0B	chr1:44440319-44443972	OK	65.979	73.3488	0.152766	1.30954	0.02215	0.0684902	no		1.1117
ATP6V0C	ATP6V0C	ATP6V0C	chr16:2563726-2570224	OK	153.64	152.548	-0.0102891	-0.0700705	0.9018	0.948508	no		0.992894
ATP6V0CP3	ATP6V0CP3	ATP6V0CP3	chr6:42695313-42695932	NOTEST	0	0	0	0	1	1	no		1
ATP6V0D1	ATP6V0D1	ATP6V0D1	chr16:67471916-67515089	OK	125.634	120.354	-0.0619427	-0.429864	0.454	0.625667	no		0.957973
ATP6V0D2	ATP6V0D2	ATP6V0D2	chr8:87111138-87166454	OK	0.635775	0.756407	0.250647	0.621989	0.27805	0.453995	no		1.18974
ATP6V0E1	ATP6V0E1	ATP6V0E1	chr5:172410762-172461900	OK	210.085	220.761	0.0715071	0.493224	0.3819	0.560773	no		1.05081
ATP6V0E2	ATP6V0E2	ATP6V0E2	chr7:149564782-149577801	OK	13.955	6.24255	-1.16057	-7.58808	5e-05	0.000373901	yes		0.447336
ATP6V0E2-AS1	ATP6V0E2-AS1	ATP6V0E2-AS1	chr7:149564782-149577801	OK	1.31767	0.964993	-0.449395	-0.920468	0.1101	0.234531	no		0.73235
ATP6V1A	ATP6V1A	ATP6V1A	chr3:113465865-113530905	OK	43.2042	39.1012	-0.143958	-0.998611	0.07645	0.178159	no		0.905033
ATP6V1B1	ATP6V1B1	ATP6V1B1	chr2:71162997-71192561	NOTEST	0.137449	0.277633	1.01428	0	1	1	no		2.01989
ATP6V1B1-AS1	ATP6V1B1-AS1	ATP6V1B1-AS1	chr2:71162997-71192561	OK	2.22354	2.45349	0.141978	0.338206	0.5409	0.703289	no		1.10342
ATP6V1B2	ATP6V1B2	ATP6V1B2	chr8:20054703-20079207	OK	87.8678	84.5341	-0.055801	-0.39009	0.4959	0.663962	no		0.96206
ATP6V1C1	ATP6V1C1	ATP6V1C1	chr8:104033247-104085285	OK	21.7108	19.8638	-0.128267	-0.8753	0.12375	0.256415	no		0.91493
ATP6V1C2	ATP6V1C2	ATP6V1C2	chr2:10861774-10978103	NOTEST	0.21847	0.152326	-0.520271	0	1	1	no		0.697241
ATP6V1D	ATP6V1D	ATP6V1D	chr14:67804580-67826720	OK	60.5899	63.8837	0.0763709	0.518019	0.3603	0.541278	no		1.05436
ATP6V1E1	ATP6V1E1	ATP6V1E1	chr22:18074902-18111588	OK	69.2841	75.8402	0.130437	1.02946	0.07105	0.168418	no		1.09463
ATP6V1E2	ATP6V1E2	ATP6V1E2	chr2:46738985-46747096	OK	0.78051	0.626418	-0.317292	-0.737039	0.20985	0.372683	no		0.802575
ATP6V1F	ATP6V1F	ATP6V1F	chr7:128502856-128505903	OK	147.488	163.883	0.152065	1.24846	0.0283	0.0828848	no		1.11116
ATP6V1G1	ATP6V1G1	ATP6V1G1	chr9:117349993-117361152	OK	72.2798	83.3056	0.204821	1.39571	0.01255	0.043217	yes		1.15254
ATP6V1G2	ATP6V1G2	ATP6V1G2	chr6_ssto_hap7:2827543-2845430	NOTEST	0.447084	0.435052	-0.0393563	0	1	1	no		0.973089
ATP6V1G2-DDX39B	ATP6V1G2-DDX39B	ATP6V1G2-DDX39B	chr6_ssto_hap7:2827543-2845430	NOTEST	0.17623	0.502032	1.51032	0	1	1	no		2.84873
ATP6V1G3	ATP6V1G3	ATP6V1G3	chr1:198492351-198510075	NOTEST	0	0	0	0	1	1	no		1
ATP6V1H	ATP6V1H	ATP6V1H	chr8:54628102-54755871	OK	33.1744	28.4005	-0.224157	-1.86687	0.001	0.00523872	yes		0.856095
ATP7A	ATP7A	ATP7A	chrX:77166152-77305892	OK	4.84743	5.36872	0.147358	1.17791	0.038	0.104517	no		1.10754
ATP7B	ATP7B	ATP7B	chr13:52506805-52585630	NOTEST	0.192034	0.0626011	-1.6171	0	1	1	no		0.32599
ATP8A1	ATP8A1	ATP8A1	chr4:42410391-42659122	NOTEST	0.0968997	0.140264	0.533576	0	1	1	no		1.44751
ATP8A2	ATP8A2	ATP8A2	chr13:25946208-26595420	NOTEST	0.00352113	0.0188473	2.42024	0	1	1	no		5.3526
ATP8B1	ATP8B1	ATP8B1	chr18:55297533-55470327	OK	10.0606	10.1981	0.0195849	0.158966	0.7838	0.881287	no		1.01367
ATP8B2	ATP8B2	ATP8B2	chr1:154298035-154323780	OK	31.2175	27.422	-0.187023	-1.12947	0.04825	0.125748	no		0.878416
ATP8B3	ATP8B3	ATP8B3	chr19:1782073-1812275	OK	0.850941	0.918814	0.110713	0.440734	0.44215	0.616172	no		1.07976
ATP8B4	ATP8B4	ATP8B4	chr15:50150434-50411419	OK	0.685421	0.4144	-0.725966	-2.18958	5e-05	0.000373901	yes		0.604592
ATP8B5P	ATP8B5P	ATP8B5P	chr9:35406751-35483026	NOTEST	0.0209048	0.0807102	1.94892	0	1	1	no		3.86085
ATP9A	ATP9A	ATP9A	chr20:50213313-50384950	OK	14.9755	16.5693	0.145904	0.996634	0.07805	0.180903	no		1.10642
ATP9B	ATP9B	ATP9B	chr18:76829274-77138282	OK	5.53573	5.17007	-0.0985888	-0.69164	0.23335	0.402505	no		0.933946
ATPAF1	ATPAF1	ATPAF1	chr1:47100710-47134099	OK	12.4642	10.7259	-0.216684	-1.41747	0.0132	0.0450803	yes		0.860541
ATPAF2	ATPAF2	ATPAF2	chr17:17921333-17942480	OK	11.7114	12.9152	0.141148	0.912742	0.10895	0.23264	no		1.10278
ATPIF1	ATPIF1	ATPIF1	chr1:28562601-28564616	OK	68.1191	89.7664	0.398115	2.63359	5e-05	0.000373901	yes		1.31778
ATR	ATR	ATR	chr3:142168076-142297668	OK	9.24613	8.99147	-0.0402925	-0.346079	0.54145	0.703848	no		0.972458
ATRAID	ATRAID	ATRAID	chr2:27422454-27440046	OK	67.7988	69.8731	0.0434786	0.224641	0.6961	0.821029	no		1.0306
ATRIP	ATRIP	ATRIP	chr3:48488113-48509044	OK	3.91347	4.34098	0.149572	0.6174	0.277	0.452832	no		1.10924
ATRN	ATRN	ATRN	chr20:3451664-3631769	OK	53.0183	54.5608	0.0413753	0.257718	0.6559	0.789814	no		1.02909
ATRNL1	ATRNL1	ATRNL1	chr10:116853123-117708509	NOTEST	0	0	0	0	1	1	no		1
ATRX	ATRX	ATRX	chrX:76760355-77041755	OK	11.0296	11.9918	0.12066	0.823504	0.15135	0.29619	no		1.08723
ATXN1	ATXN1	ATXN1	chr6:16299342-16761721	OK	1.92443	2.09532	0.12274	0.844427	0.14385	0.285973	no		1.0888
ATXN10	ATXN10	ATXN10	chr22:46067677-46241187	OK	29.8673	29.5112	-0.0173077	-0.130632	0.8232	0.903186	no		0.988075
ATXN1L	ATXN1L	ATXN1L	chr16:71879893-71891236	OK	10.0789	7.49092	-0.428128	-3.63173	5e-05	0.000373901	yes		0.743226
ATXN2	ATXN2	ATXN2	chr12:111890017-112037480	OK	13.3787	12.3492	-0.115522	-0.923873	0.10895	0.23264	no		0.923048
ATXN2L	ATXN2L	ATXN2L	chr16:28834368-28848558	OK	61.7972	64.5657	0.063226	0.437814	0.44345	0.617292	no		1.0448
ATXN3	ATXN3	ATXN3	chr14:92524895-92572965	OK	2.80758	3.21839	0.197014	1.31592	0.01595	0.0526761	no		1.14632
ATXN3L	ATXN3L	ATXN3L	chrX:13328770-13338518	NOTEST	0	0	0	0	1	1	no		1
ATXN7	ATXN7	ATXN7	chr3:63850232-63989136	OK	5.09402	5.04953	-0.0126535	-0.0950599	0.86685	0.929217	no		0.991268
ATXN7L1	ATXN7L1	ATXN7L1	chr7:105245220-105517031	OK	2.88605	2.23755	-0.367176	-1.48163	0.00985	0.0354218	yes		0.775299
ATXN7L2	ATXN7L2	ATXN7L2	chr1:110026560-110035420	OK	2.29551	2.33776	0.0263109	0.111787	0.8426	0.915975	no		1.0184
ATXN7L3	ATXN7L3	ATXN7L3	chr17:42269172-42275529	OK	35.9497	36.611	0.0262963	0.179994	0.7511	0.859458	no		1.01839
ATXN7L3B	ATXN7L3B	ATXN7L3B	chr12:74931550-74935232	OK	44.3885	46.1152	0.0550575	0.380271	0.4939	0.662065	no		1.0389
ATXN8OS	ATXN8OS	ATXN8OS	chr13:70274724-70713885	NOTEST	0	0	0	0	1	1	no		1
AUH	AUH	AUH	chr9:93976096-94124251	OK	4.90578	3.58491	-0.452547	-2.01731	0.0006	0.00337069	yes		0.730752
AUNIP	AUNIP	AUNIP	chr1:26146396-26185949	OK	1.71593	1.20146	-0.514195	-0.78099	0.17215	0.324719	no		0.700184
AUP1	AUP1	AUP1	chr2:74753774-74784678	OK	73.0861	79.2893	0.117529	0.702276	0.222	0.387938	no		1.08488
AURKA	AURKA	AURKA	chr20:54944444-54967351	OK	14.9825	12.2461	-0.290956	-2.09125	0.0003	0.00183562	yes		0.81736
AURKAIP1	AURKAIP1	AURKAIP1	chr1:1309109-1310818	OK	68.9263	47.3784	-0.540824	-4.18286	5e-05	0.000373901	yes		0.687378
AURKAPS1	AURKAPS1	AURKAPS1	chr1:220321609-220445843	NOTEST	0.374496	0.263302	-0.508231	0	1	1	no		0.703084
AURKB	AURKB	AURKB	chr17:8108048-8113944	OK	5.12752	1.62543	-1.65745	-5.32375	5e-05	0.000373901	yes		0.316999
AURKC	AURKC	AURKC	chr19:57742376-57746916	OK	0.566797	0.303952	-0.898987	-0.98341	0.06255	0.153241	no		0.536263
AUTS2	AUTS2	AUTS2	chr7:69063904-70258054	NOTEST	0	0	0	0	1	1	no		1
AVEN	AVEN	AVEN	chr15:34158427-34357287	OK	14.3073	16.6594	0.21958	1.5028	0.0091	0.0332934	yes		1.16439
AVIL	AVIL	AVIL	chr12:58176527-58209852	NOTEST	0.369326	0.517538	0.486769	0	1	1	no		1.4013
AVL9	AVL9	AVL9	chr7:32535037-32758780	OK	9.52706	8.47818	-0.168277	-1.4091	0.0147	0.0493083	yes		0.889905
AVP	AVP	AVP	chr20:3063201-3065370	NOTEST	0	0	0	0	1	1	no		1
AVPI1	AVPI1	AVPI1	chr10:99437180-99447015	OK	7.98686	7.63773	-0.0644854	-0.347472	0.5415	0.703848	no		0.956286
AVPR1A	AVPR1A	AVPR1A	chr12:63536538-63546590	NOTEST	0.00222087	0	#NAME?	0	1	1	no		#NAME?
AVPR1B	AVPR1B	AVPR1B	chr1:206224282-206231482	NOTEST	0	0	0	0	1	1	no		1
AVPR2	AVPR2	AVPR2	chrX:153167984-153172620	NOTEST	0.21702	0.260191	0.261744	0	1	1	no		1.19893
AWAT1	AWAT1	AWAT1	chrX:69454504-69460511	NOTEST	0	0	0	0	1	1	no		1
AWAT2	AWAT2	AWAT2	chrX:69260391-69269788	NOTEST	0.0095004	0	#NAME?	0	1	1	no		#NAME?
AXDND1	AXDND1	AXDND1	chr1:179334854-179545087	NOTEST	0.0272396	0.0224292	-0.280332	0	1	1	no		0.823402
AXIN1	AXIN1	AXIN1	chr16:337439-402676	OK	11.0947	11.3067	0.0273068	0.213581	0.7018	0.825128	no		1.01911
AXIN2	AXIN2	AXIN2	chr17:63524682-63557740	OK	0.823784	0.934369	0.181725	0.662583	0.2464	0.417877	no		1.13424
AXL	AXL	AXL	chr19:41725103-41767672	OK	111.394	64.1295	-0.796606	-5.61176	5e-05	0.000373901	yes		0.575702
AZGP1	AZGP1	AZGP1	chr7:99564349-99573735	NOTEST	0.0329493	0	#NAME?	0	1	1	no		#NAME?
AZGP1P1	AZGP1P1	AZGP1P1	chr7:99578384-99581860	NOTEST	0	0	0	0	1	1	no		1
AZI2	AZI2	AZI2	chr3:28363843-28390618	OK	39.5516	44.2535	0.162056	1.06016	0.06585	0.159036	no		1.11888
AZIN1	AZIN1	AZIN1	chr8:103838529-103876428	OK	22.8486	23.9696	0.0690997	0.484249	0.3871	0.564604	no		1.04906
AZIN1-AS1	AZIN1-AS1	AZIN1-AS1	chr8:103876498-103990104	NOTEST	0	0.342905	inf	0	1	1	no		#VALUE!
AZIN2	AZIN2	AZIN2	chr1:33546713-33586132	OK	1.81829	1.69087	-0.104824	-0.262947	0.60455	0.752341	no		0.929918
AZU1	AZU1	AZU1	chr19:827830-832017	NOTEST	0.0251953	0	#NAME?	0	1	1	no		#NAME?
B2M	B2M	B2M	chr15:45003684-45010357	OK	454.687	494.293	0.120494	0.848217	0.13255	0.269518	no		1.08711
B3GALNT1	B3GALNT1	B3GALNT1	chr3:160801670-160823160	NOTEST	0	0	0	0	1	1	no		1
B3GALNT2	B3GALNT2	B3GALNT2	chr1:235530674-235667781	OK	8.55207	9.28846	0.119166	0.713487	0.21165	0.374915	no		1.08611
B3GALT1	B3GALT1	B3GALT1	chr2:168671283-168797654	NOTEST	0.062811	0.026211	-1.26085	0	1	1	no		0.417298
B3GALT2	B3GALT2	B3GALT2	chr1:193091087-193223942	NOTEST	0	0	0	0	1	1	no		1
B3GALT4	B3GALT4	B3GALT4	chr6_qbl_hap6:4477155-4478841	OK	0.23236	0.563301	1.27755	1.68724	0.0128	0.0439438	yes		2.42427
B3GALT5	B3GALT5	B3GALT5	chr21:40984866-41034816	NOTEST	0	0	0	0	1	1	no		1
B3GALT5-AS1	B3GALT5-AS1	B3GALT5-AS1	chr21:40969074-40984749	NOTEST	0	0	0	0	1	1	no		1
B3GALT6	B3GALT6	B3GALT6	chr1:1167628-1170420	OK	7.07807	10.9559	0.630278	4.39323	5e-05	0.000373901	yes		1.54786
B3GAT1	B3GAT1	B3GAT1	chr11:134248397-134281812	NOTEST	0.0110484	0	#NAME?	0	1	1	no		#NAME?
B3GAT2	B3GAT2	B3GAT2	chr6:71377473-71666788	OK	0.984038	0.92445	-0.0901197	-0.139978	0.8119	0.897263	no		0.939445
B3GAT3	B3GAT3	B3GAT3	chr11:62382767-62389647	OK	53.6544	49.1502	-0.1265	-1.08288	0.0582	0.145365	no		0.916051
B3GLCT	B3GLCT	B3GLCT	chr13:31774111-31906411	OK	2.4509	1.95802	-0.323917	-1.69776	0.0032	0.0140549	yes		0.798898
B3GNT2	B3GNT2	B3GNT2	chr2:62423261-62451866	OK	10.9117	10.7415	-0.0226839	-0.166365	0.7728	0.875098	no		0.9844
B3GNT3	B3GNT3	B3GNT3	chr19:17905918-17924385	OK	0.873612	0.31232	-1.48397	-3.29002	5e-05	0.000373901	yes		0.357504
B3GNT4	B3GNT4	B3GNT4	chr12:122688227-122692084	NOTEST	0.0909874	0.0598593	-0.60409	0	1	1	no		0.657886
B3GNT5	B3GNT5	B3GNT5	chr3:182895791-183146057	OK	10.4278	14.3294	0.458534	3.70962	5e-05	0.000373901	yes		1.37414
B3GNT6	B3GNT6	B3GNT6	chr11:76745384-76753005	NOTEST	0	0	0	0	1	1	no		1
B3GNT7	B3GNT7	B3GNT7	chr2:232260334-232265875	NOTEST	0.0207615	0.0438486	1.07862	0	1	1	no		2.11201
B3GNT8	B3GNT8	B3GNT8	chr19:41931263-41934635	NOTEST	0	0.0680191	inf	0	1	1	no		#VALUE!
B3GNT9	B3GNT9	B3GNT9	chr16:67143914-67184902	OK	7.73961	11.2255	0.536451	2.68959	5e-05	0.000373901	yes		1.4504
B3GNTL1	B3GNTL1	B3GNTL1	chr17:80901666-81009686	OK	7.19864	7.51434	0.0619226	0.325748	0.5706	0.726543	no		1.04386
B4GALNT1	B4GALNT1	B4GALNT1	chr12:58012187-58027022	OK	6.69817	8.15958	0.284729	1.70963	0.00285	0.0127383	yes		1.21818
B4GALNT2	B4GALNT2	B4GALNT2	chr17:47209821-47247351	NOTEST	0	0	0	0	1	1	no		1
B4GALNT3	B4GALNT3	B4GALNT3	chr12:569542-671058	NOTEST	0.00567068	0	#NAME?	0	1	1	no		#NAME?
B4GALNT4	B4GALNT4	B4GALNT4	chr11:369794-382117	OK	8.50577	11.0717	0.380359	2.86255	5e-05	0.000373901	yes		1.30167
B4GALT1	B4GALT1	B4GALT1	chr9:33110638-33179981	OK	22.3594	20.343	-0.136346	-1.18601	0.04025	0.109325	no		0.909821
B4GALT1-AS1	B4GALT1-AS1	B4GALT1-AS1	chr9:33110638-33179981	NOTEST	0.303476	0.313199	0.0455012	0	1	1	no		1.03204
B4GALT2	B4GALT2	B4GALT2	chr1:44444873-44456843	OK	36.1191	43.2758	0.260796	2.24468	5e-05	0.000373901	yes		1.19814
B4GALT3	B4GALT3	B4GALT3	chr1:161141099-161147758	OK	15.6164	14.6378	-0.0933631	-0.711869	0.21505	0.379261	no		0.937335
B4GALT4	B4GALT4	B4GALT4	chr3:118930588-119009513	OK	18.0003	19.5276	0.117495	0.917473	0.11525	0.24296	no		1.08485
B4GALT4-AS1	B4GALT4-AS1	B4GALT4-AS1	chr3:118930588-119009513	NOTEST	0	0	0	0	1	1	no		1
B4GALT5	B4GALT5	B4GALT5	chr20:48249482-48330421	OK	121.74	176.37	0.5348	3.78388	5e-05	0.000373901	yes		1.44874
B4GALT6	B4GALT6	B4GALT6	chr18:29202208-29264686	OK	4.30062	3.30871	-0.378275	-2.46696	5e-05	0.000373901	yes		0.769357
B4GALT7	B4GALT7	B4GALT7	chr5:177027118-177037346	OK	27.6099	28.1255	0.0266899	0.213005	0.70875	0.829178	no		1.01867
B4GAT1	B4GAT1	B4GAT1	chr11:66112842-66115161	OK	28.334	20.2547	-0.48428	-3.88812	5e-05	0.000373901	yes		0.714854
B9D1	B9D1	B9D1	chr17:19240866-19290532	OK	30.733	27.2403	-0.174048	-0.756675	0.18755	0.345273	no		0.886352
B9D2	B9D2	B9D2	chr19:41860321-41889987	OK	7.26824	8.9165	0.29487	1.2374	0.0342	0.0962825	no		1.22677
BAALC	BAALC	BAALC	chr8:104145190-104242533	NOTEST	0.0197459	0	#NAME?	0	1	1	no		#NAME?
BAALC-AS1	BAALC-AS1	BAALC-AS1	chr8:104145190-104242533	NOTEST	0.0628588	0.0336483	-0.901582	0	1	1	no		0.535299
BAALC-AS2	BAALC-AS2	BAALC-AS2	chr8:104145190-104242533	NOTEST	0	0	0	0	1	1	no		1
BAAT	BAAT	BAAT	chr9:104122698-104147287	NOTEST	0.0329068	0.0649182	0.980237	0	1	1	no		1.97279
BABAM1	BABAM1	BABAM1	chr19:17378184-17390162	OK	49.1957	38.6851	-0.346753	-2.86958	5e-05	0.000373901	yes		0.786352
BACE1	BACE1	BACE1	chr11:117103340-117186972	OK	8.83877	9.94317	0.16986	1.1379	0.04605	0.121184	no		1.12495
BACE1-AS	BACE1-AS	BACE1-AS	chr11:117103340-117186972	OK	1.97295	1.79823	-0.133779	-0.118073	0.84075	0.915005	no		0.911441
BACE2	BACE2	BACE2	chr21:42539727-42654461	OK	7.2076	5.74643	-0.326854	-2.71426	5e-05	0.000373901	yes		0.797273
BACH1	BACH1	BACH1	chr21:30671115-30734217	OK	13.5211	13.1846	-0.0363617	-0.307315	0.58945	0.740973	no		0.975111
BACH1-IT2	BACH1-IT2	BACH1-IT2	chr21:30744820-30746300	NOTEST	0	0	0	0	1	1	no		1
BACH2	BACH2	BACH2	chr6:90636246-91006627	NOTEST	0.00967953	0.0093536	-0.049416	0	1	1	no		0.966327
BAD	BAD	BAD	chr11:64037299-64056972	OK	47.4314	28.5631	-0.731691	-3.6913	5e-05	0.000373901	yes		0.602198
BAG1	BAG1	BAG1	chr9:33252469-33264759	OK	3.62708	4.2575	0.2312	1.43158	0.01375	0.0465999	yes		1.17381
BAG2	BAG2	BAG2	chr6:57037103-57050012	OK	14.0164	12.8216	-0.128547	-0.920254	0.1069	0.229248	no		0.914752
BAG3	BAG3	BAG3	chr10:121410881-121437329	OK	57.919	41.8798	-0.467782	-3.19422	5e-05	0.000373901	yes		0.723075
BAG4	BAG4	BAG4	chr8:38020838-38070819	OK	6.3072	5.86066	-0.105939	-0.57871	0.315	0.495581	no		0.9292
BAG5	BAG5	BAG5	chr14:104022880-104029151	OK	13.5332	15.4991	0.19569	1.66554	0.00335	0.0145746	yes		1.14527
BAG6	BAG6	BAG6	chr6_ssto_hap7:2937601-2956785	OK	49.084	54.2712	0.144934	1.00141	0.07715	0.179487	no		1.10568
BAGE	BAGE,BAGE5	BAGE,BAGE5	chr21:11020841-11098937	NOTEST	0.0826105	0.0473544	-0.802828	0	1	1	no		0.573224
BAGE2	BAGE2	BAGE2	chr21:11020841-11098937	NOTEST	0.0964173	0.153756	0.673279	0	1	1	no		1.59469
BAGE4	BAGE4	BAGE4	chr21:11020841-11098937	NOTEST	0.0659186	0.117752	0.836989	0	1	1	no		1.78632
BAGE5	BAGE5	BAGE5	chr21:11020841-11098937	NOTEST	0.0689033	0.121338	0.81638	0	1	1	no		1.76098
BAHCC1	BAHCC1	BAHCC1	chr17:79373520-79433358	OK	1.1686	1.01901	-0.197614	-1.12137	0.0496	0.128324	no		0.871992
BAHD1	BAHD1	BAHD1	chr15:40731919-40760441	OK	11.2353	10.0696	-0.158023	-1.11876	0.05285	0.134767	no		0.896252
BAIAP2	BAIAP2	BAIAP2	chr17:79008946-79156964	OK	6.80198	7.06966	0.0556876	0.364766	0.5216	0.686168	no		1.03935
BAIAP2-AS1	BAIAP2-AS1	BAIAP2-AS1	chr17:79002932-79008519	OK	2.76243	4.84334	0.810063	5.0577	5e-05	0.000373901	yes		1.75329
BAIAP2L1	BAIAP2L1	BAIAP2L1	chr7:97910978-98030427	OK	2.75559	2.01378	-0.452456	-0.99539	0.08635	0.195329	no		0.730798
BAIAP2L2	BAIAP2L2	BAIAP2L2	chr22:38480895-38506676	NOTEST	0.168681	0.198579	0.235418	0	1	1	no		1.17725
BAIAP3	BAIAP3	BAIAP3	chr16:1383605-1401873	NOTEST	0.0569419	0.101061	0.827668	0	1	1	no		1.77481
BAK1	BAK1	BAK1	chr6:33540322-33548070	OK	16.5491	17.5149	0.0818353	0.626403	0.27175	0.447429	no		1.05836
BAMBI	BAMBI	BAMBI	chr10:28966423-28971868	NOTEST	0.39881	0.481267	0.271134	0	1	1	no		1.20676
BANCR	BANCR	BANCR	chr9:71911596-71921972	NOTEST	0	0	0	0	1	1	no		1
BANF1	BANF1	BANF1	chr11:65764015-65771617	OK	125.691	139.348	0.148815	0.916846	0.10985	0.234119	no		1.10866
BANF2	BANF2	BANF2	chr20:17674319-17716517	NOTEST	0	0	0	0	1	1	no		1
BANK1	BANK1	BANK1	chr4:102711763-102995969	NOTEST	0	0	0	0	1	1	no		1
BANP	BANP	BANP	chr16:87985037-88110924	OK	4.52309	4.63695	0.0358702	0.192313	0.7322	0.846093	no		1.02517
BAP1	BAP1	BAP1	chr3:52435019-52444121	OK	24.0069	22.2456	-0.10993	-0.953876	0.0953	0.210252	no		0.926633
BARD1	BARD1	BARD1	chr2:215590369-215674435	NOTEST	0.414376	0.403028	-0.0400602	0	1	1	no		0.972614
BARHL1	BARHL1	BARHL1	chr9:135457992-135465640	NOTEST	0	0.0132283	inf	0	1	1	no		#VALUE!
BARHL2	BARHL2	BARHL2	chr1:91177578-91182794	NOTEST	0	0	0	0	1	1	no		1
BARX1	BARX1	BARX1	chr9:96713908-96717608	NOTEST	0	0	0	0	1	1	no		1
BARX2	BARX2	BARX2	chr11:129245880-129322174	NOTEST	0	0	0	0	1	1	no		1
BASP1	BASP1	BASP1	chr5:17130136-17276954	OK	35.9892	24.2197	-0.571385	-4.6645	5e-05	0.000373901	yes		0.67297
BASP1P1	BASP1P1	BASP1P1	chr13:23471168-23472320	NOTEST	0	0	0	0	1	1	no		1
BATF	BATF	BATF	chr14:75988783-76013334	NOTEST	0.139949	0.42644	1.60745	0	1	1	no		3.04713
BATF2	BATF2	BATF2	chr11:64755416-64764517	OK	3.55538	1.39338	-1.35141	-4.807	5e-05	0.000373901	yes		0.391909
BATF3	BATF3	BATF3	chr1:212859758-212873327	OK	1.50468	0.527199	-1.51303	-2.36713	0.0018	0.00866246	yes		0.350375
BAX	BAX	BAX	chr19:49458116-49465055	OK	199.568	212.185	0.0884441	0.601489	0.2925	0.469823	no		1.06322
BAZ1A	BAZ1A	BAZ1A	chr14:35221936-35344853	OK	16.0617	19.168	0.255071	1.85581	0.00165	0.00803712	yes		1.19339
BAZ1B	BAZ1B	BAZ1B	chr7:72854727-72936615	OK	19.8004	21.1189	0.0929989	0.636171	0.2587	0.432944	no		1.06658
BAZ2A	BAZ2A	BAZ2A	chr12:56915608-57030163	OK	32.5234	32.4822	-0.00183097	-0.0105809	0.98555	0.992341	no		0.998732
BAZ2B	BAZ2B	BAZ2B	chr2:160175489-160474553	NOTEST	0.0977329	0.098338	0.00890406	0	1	1	no		1.00619
BBC3	BBC3	BBC3	chr19:47724078-47736023	OK	13.4481	13.876	0.0451976	0.28875	0.6089	0.755923	no		1.03182
BBIP1	BBIP1	BBIP1	chr10:112631552-112679124	OK	10.6652	10.8602	0.0261507	0.058449	0.9212	0.958471	no		1.01829
BBOX1	BBOX1	BBOX1	chr11:27062508-27241660	NOTEST	0.0101346	0	#NAME?	0	1	1	no		#NAME?
BBOX1-AS1	BBOX1-AS1	BBOX1-AS1	chr11:27062508-27241660	NOTEST	0	0.0745223	inf	0	1	1	no		#VALUE!
BBS1	BBS1	BBS1	chr11:66278118-66301084	OK	8.48748	7.61082	-0.157284	-1.13174	0.04785	0.124941	no		0.896712
BBS10	BBS10	BBS10	chr12:76738265-76742222	OK	7.51031	10.208	0.442755	3.28328	5e-05	0.000373901	yes		1.3592
BBS12	BBS12	BBS12	chr4:123653856-123666098	OK	2.90376	2.61045	-0.153627	-0.792313	0.16085	0.309323	no		0.898988
BBS2	BBS2	BBS2	chr16:56518258-56554008	OK	27.8949	26.7265	-0.0617313	-0.528769	0.3536	0.534965	no		0.958114
BBS4	BBS4	BBS4	chr15:72978519-73030817	OK	8.48616	7.13462	-0.250275	-1.64348	0.0046	0.0190328	yes		0.840736
BBS5	BBS5	BBS5	chr2:170336005-170363165	OK	1.41674	1.55686	0.13606	0.54454	0.34425	0.526592	no		1.0989
BBS7	BBS7	BBS7	chr4:122745483-122791652	OK	9.56344	8.97457	-0.0916871	-0.61556	0.28695	0.463908	no		0.938425
BBS9	BBS9	BBS9	chr7:33169151-33645680	OK	4.01173	3.71085	-0.112473	-0.697236	0.2215	0.387391	no		0.925001
BBX	BBX	BBX	chr3:107241782-107530176	OK	17.5883	19.5968	0.156002	1.08565	0.05795	0.144828	no		1.1142
BCAM	BCAM	BCAM	chr19:45312315-45324678	OK	6.38234	7.0443	0.142372	0.905549	0.1141	0.241068	no		1.10372
BCAN	BCAN	BCAN	chr1:156611739-156629324	OK	0.659175	0.664051	0.010632	0.0291807	0.9609	0.980036	no		1.0074
BCAP29	BCAP29	BCAP29	chr7:107220421-107263762	OK	10.1146	10.5962	0.0671003	0.562857	0.3229	0.503103	no		1.04761
BCAP31	BCAP31	BCAP31	chrX:152965946-152990201	OK	209.788	210.848	0.00727647	0.0504206	0.9297	0.962713	no		1.00506
BCAR1	BCAR1	BCAR1	chr16:75262927-75301951	OK	80.7593	75.8322	-0.0908173	-0.629649	0.2713	0.447044	no		0.938991
BCAR3	BCAR3	BCAR3	chr1:94027297-94312706	OK	19.6308	22.2433	0.180255	1.51236	0.0081	0.0302769	yes		1.13308
BCAR4	BCAR4	BCAR4	chr16:11913690-11922689	NOTEST	0	0.140127	inf	0	1	1	no		#VALUE!
BCAS1	BCAS1	BCAS1	chr20:52560078-52687304	NOTEST	0.0796871	0.0240913	-1.72584	0	1	1	no		0.302322
BCAS2	BCAS2	BCAS2	chr1:115110180-115124265	OK	22.2813	22.8473	0.036189	0.259698	0.64725	0.784188	no		1.0254
BCAS3	BCAS3	BCAS3	chr17:58755171-59470199	OK	11.2689	9.91537	-0.184607	-1.42026	0.0132	0.0450803	yes		0.879889
BCAS4	BCAS4	BCAS4	chr20:49411430-49493714	OK	18.5561	15.4027	-0.268713	-1.77836	0.0021	0.00985794	yes		0.83006
BCAT1	BCAT1	BCAT1	chr12:24962957-25102393	OK	25.8617	30.0459	0.216351	1.50178	0.00755	0.0285128	yes		1.16179
BCAT2	BCAT2	BCAT2	chr19:49298318-49314320	OK	41.168	40.854	-0.011047	-0.0909468	0.8687	0.929542	no		0.992372
BCCIP	BCCIP	BCCIP	chr10:127512103-127569884	OK	31.6191	28.3842	-0.15571	-0.871522	0.1285	0.263426	no		0.89769
BCDIN3D	BCDIN3D	BCDIN3D	chr12:50222325-50236912	OK	1.97048	2.27352	0.206381	0.928561	0.1069	0.229248	no		1.15379
BCDIN3D-AS1	BCDIN3D-AS1	BCDIN3D-AS1	chr12:50222325-50236912	NOTEST	0.367794	0.397544	0.112215	0	1	1	no		1.08089
BCHE	BCHE	BCHE	chr3:165490691-165555253	OK	16.808	18.0063	0.0993586	0.780671	0.172	0.324535	no		1.0713
BCKDHA	BCKDHA	BCKDHA	chr19:41903693-41930910	OK	16.3486	16.3205	-0.00248225	-0.0179207	0.97465	0.986936	no		0.998281
BCKDHB	BCKDHB	BCKDHB	chr6:80816343-81055987	OK	8.63917	9.48862	0.135305	0.751888	0.19	0.348081	no		1.09832
BCKDK	BCKDK	BCKDK	chr16:31119614-31124112	OK	45.8899	48.0538	0.066473	0.503081	0.3749	0.554097	no		1.04715
BCL10	BCL10	BCL10	chr1:85731459-85743771	OK	7.09687	8.24221	0.215848	1.49144	0.00875	0.0322504	yes		1.16139
BCL11A	BCL11A	BCL11A	chr2:60678301-60780633	NOTEST	0.458879	0.303452	-0.596646	0	1	1	no		0.66129
BCL11B	BCL11B	BCL11B	chr14:99635624-99738050	NOTEST	0.0477714	0.0432226	-0.144361	0	1	1	no		0.90478
BCL2	BCL2	BCL2	chr18:60790578-60986613	NOTEST	0	0.00533508	inf	0	1	1	no		#VALUE!
BCL2A1	BCL2A1	BCL2A1	chr15:80253231-80263643	NOTEST	0.391064	0.339274	-0.204956	0	1	1	no		0.867565
BCL2L1	BCL2L1	BCL2L1	chr20:30252260-30311212	OK	149.699	170.731	0.189654	1.12752	0.04995	0.128934	no		1.14049
BCL2L10	BCL2L10	BCL2L10	chr15:52401465-52404972	NOTEST	0.0173594	0.0173507	-0.000715994	0	1	1	no		0.999504
BCL2L11	BCL2L11	BCL2L11	chr2:111878490-111926022	OK	2.59739	3.48704	0.424941	2.20656	5e-05	0.000373901	yes		1.34252
BCL2L12	BCL2L12	BCL2L12	chr19:50162825-50177173	OK	6.54896	6.10837	-0.100477	-0.299245	0.58725	0.739106	no		0.932725
BCL2L13	BCL2L13	BCL2L13	chr22:18121349-18213621	OK	10.1435	10.8515	0.0973401	0.775902	0.17365	0.327052	no		1.0698
BCL2L14	BCL2L14	BCL2L14	chr12:12223877-12252627	NOTEST	0	0.0133851	inf	0	1	1	no		#VALUE!
BCL2L15	BCL2L15	BCL2L15	chr1:114355233-114447746	NOTEST	0.0110679	0.00386151	-1.51914	0	1	1	no		0.348894
BCL2L2	BCL2L2	BCL2L2	chr14:23775970-23795394	OK	14.2095	13.3693	-0.087935	-0.309199	0.59255	0.743666	no		0.940868
BCL2L2-PABPN1	BCL2L2-PABPN1	BCL2L2-PABPN1	chr14:23775970-23795394	OK	32.7339	35.277	0.107942	0.434602	0.44865	0.621258	no		1.07769
BCL3	BCL3	BCL3	chr19:45251977-45263301	OK	7.93994	8.529	0.103249	0.630166	0.27295	0.448714	no		1.07419
BCL6	BCL6	BCL6	chr3:187416046-187463513	OK	44.5832	63.413	0.508279	3.503	5e-05	0.000373901	yes		1.42235
BCL6B	BCL6B	BCL6B	chr17:6926368-6932961	OK	3.58836	3.62423	0.0143514	0.0839406	0.88735	0.940424	no		1.01
BCL7A	BCL7A	BCL7A	chr12:122459791-122499950	OK	3.27195	3.40693	0.0583216	0.337683	0.5536	0.714046	no		1.04125
BCL7B	BCL7B	BCL7B	chr7:72950682-72972065	OK	21.6842	19.0965	-0.183339	-1.37695	0.01605	0.0529641	no		0.880662
BCL7C	BCL7C	BCL7C	chr16:30845361-30906539	OK	24.3639	23.3224	-0.0630338	-0.431579	0.4476	0.620426	no		0.957249
BCL9	BCL9	BCL9	chr1:147013270-147098020	OK	3.07841	2.59845	-0.244537	-1.58411	0.0057	0.0228092	yes		0.844087
BCL9L	BCL9L	BCL9L	chr11:118754474-118781613	OK	52.3632	50.1456	-0.06243	-0.438417	0.4415	0.615336	no		0.95765
BCLAF1	BCLAF1	BCLAF1	chr6:136578000-136610989	OK	20.8593	21.572	0.0484701	0.332326	0.56155	0.720187	no		1.03417
BCO1	BCO1	BCO1	chr16:81272295-81324747	NOTEST	0.0152578	0	#NAME?	0	1	1	no		#NAME?
BCO2	BCO2	BCO2	chr11:112046207-112089649	OK	3.90775	3.58549	-0.124167	-0.673779	0.22955	0.397663	no		0.917534
BCOR	BCOR	BCOR	chrX:39910498-40036582	OK	8.62953	7.77946	-0.14961	-1.22086	0.03505	0.0980974	no		0.901494
BCORL1	BCORL1	BCORL1	chrX:129139163-129192058	OK	3.27094	2.28433	-0.517934	-3.47331	5e-05	0.000373901	yes		0.698371
BCORP1	BCORP1	BCORP1	chrY:21617316-21665039	NOTEST	0	0	0	0	1	1	no		1
BCR	BCR	BCR	chr22:23522551-23660224	OK	33.0545	43.2512	0.387895	2.72315	5e-05	0.000373901	yes		1.30848
BCRP2	BCRP2	BCRP2	chr22:21457304-21476575	NOTEST	0.304393	0.470537	0.628375	0	1	1	no		1.54582
BCRP3	BCRP3	BCRP3	chr22:25028881-25055114	OK	3.82842	4.06701	0.0872187	0.325213	0.5736	0.72923	no		1.06232
BCS1L	BCS1L	BCS1L	chr2:219524378-219528166	OK	11.9015	11.7737	-0.0155764	-0.0969901	0.8657	0.928812	no		0.989261
BCYRN1	BCYRN1	BCYRN1	chrX:70430034-70948962	NOTEST	0	0	0	0	1	1	no		1
BDH1	BDH1	BDH1	chr3:197236653-197300194	NOTEST	0.0730334	0.0545538	-0.420877	0	1	1	no		0.74697
BDH2	BDH2	BDH2	chr4:103998781-104021024	OK	5.68213	6.77185	0.253119	1.63863	0.00505	0.0205592	yes		1.19178
BDKRB1	BDKRB1	BDKRB1	chr14:96722546-96731100	NOTEST	0	0	0	0	1	1	no		1
BDKRB2	BDKRB2	BDKRB2	chr14:96671134-96710666	NOTEST	0	0	0	0	1	1	no		1
BDNF	BDNF	BDNF	chr11:27528398-27743605	OK	7.81575	10.6346	0.444305	3.30763	5e-05	0.000373901	yes		1.36066
BDNF-AS	BDNF-AS	BDNF-AS	chr11:27528398-27743605	OK	1.12554	1.35706	0.269877	0.359452	0.52495	0.688933	no		1.20571
BDP1	BDP1	BDP1	chr5:70751441-70863649	OK	5.3981	5.18213	-0.0589065	-0.490862	0.38875	0.566147	no		0.959991
BEAN1	BEAN1	BEAN1	chr16:66461199-66527432	NOTEST	0.0453193	0.0301025	-0.590241	0	1	1	no		0.664232
BEAN1-AS1	BEAN1-AS1	BEAN1-AS1	chr16:66461199-66527432	NOTEST	0	0	0	0	1	1	no		1
BECN1	BECN1	BECN1	chr17:40950853-40976310	OK	37.6657	44.3428	0.235449	2.02344	0.0003	0.00183562	yes		1.17727
BECN2	BECN2	BECN2	chr1:242121068-242122364	NOTEST	0	0	0	0	1	1	no		1
BEGAIN	BEGAIN	BEGAIN	chr14:101003483-101036131	NOTEST	0	0	0	0	1	1	no		1
BEND2	BEND2	BEND2	chrX:18181050-18239024	NOTEST	0	0	0	0	1	1	no		1
BEND3	BEND3	BEND3	chr6:107386384-107435636	OK	0.778807	0.903971	0.215011	0.936844	0.10225	0.221649	no		1.16071
BEND3P3	BEND3P3	BEND3P3	chr10:81442730-81448650	NOTEST	0.345461	0.391581	0.180787	0	1	1	no		1.1335
BEND4	BEND4	BEND4	chr4:42112869-42154895	NOTEST	0	0	0	0	1	1	no		1
BEND5	BEND5	BEND5	chr1:48998526-50489626	NOTEST	0	0	0	0	1	1	no		1
BEND6	BEND6	BEND6	chr6:56819772-56892142	OK	0.752257	0.755523	0.0062496	0.0172606	0.97295	0.985959	no		1.00434
BEND7	BEND7	BEND7	chr10:13480483-13544976	OK	1.01899	1.11593	0.131107	0.363981	0.5306	0.693723	no		1.09513
BEST1	BEST1	BEST1	chr11:61717355-61735132	NOTEST	0.097048	0.170824	0.815739	0	1	1	no		1.7602
BEST2	BEST2	BEST2	chr19:12863406-12869271	NOTEST	0.0206684	0	#NAME?	0	1	1	no		#NAME?
BEST3	BEST3	BEST3	chr12:70037287-70093196	NOTEST	0.0978989	0.0294038	-1.73529	0	1	1	no		0.300349
BEST4	BEST4	BEST4	chr1:45249256-45253426	NOTEST	0.0185105	0.0663126	1.84094	0	1	1	no		3.58243
BET1	BET1	BET1	chr7:93620999-93633690	OK	11.397	10.5177	-0.115836	-0.872064	0.1289	0.264115	no		0.922847
BET1L	BET1L	BET1L	chr11:202923-207422	OK	33.7148	37.8831	0.168175	1.21135	0.03675	0.101846	no		1.12364
BEX1	BEX1	BEX1	chrX:102317580-102319168	NOTEST	0	0	0	0	1	1	no		1
BEX2	BEX2	BEX2	chrX:102564273-102565974	OK	0.652661	0.869818	0.414378	0.527985	0.26305	0.437923	no		1.33272
BEX4	BEX4	BEX4	chrX:102470019-102472128	NOTEST	0.147061	0.217928	0.56744	0	1	1	no		1.48189
BEX5	BEX5	BEX5	chrX:101408678-101410986	NOTEST	0	0	0	0	1	1	no		1
BFAR	BFAR	BFAR	chr16:14726667-14763093	OK	36.4144	28.0778	-0.375081	-2.83679	5e-05	0.000373901	yes		0.771062
BFSP1	BFSP1	BFSP1	chr20:17474549-17549865	OK	4.83885	5.70374	0.237244	1.28423	0.02565	0.0768819	no		1.17874
BFSP2	BFSP2	BFSP2	chr3:133118838-133194056	NOTEST	0	0	0	0	1	1	no		1
BGLAP	BGLAP	BGLAP	chr1:156182778-156217908	NOTEST	0.10462	0.0871044	-0.264337	0	1	1	no		0.832581
BGLT3	BGLT3	BGLT3	chr11:5265783-5266776	NOTEST	0	0	0	0	1	1	no		1
BGN	BGN	BGN	chrX:152713122-152775004	OK	10.1485	8.10191	-0.324929	-1.94121	0.0008	0.00430911	yes		0.798338
BHLHA15	BHLHA15	BHLHA15	chr7:97841565-97842271	NOTEST	0.0328993	0.0865306	1.39515	0	1	1	no		2.63016
BHLHA9	BHLHA9	BHLHA9	chr17:1173857-1174565	NOTEST	0	0	0	0	1	1	no		1
BHLHB9	BHLHB9	BHLHB9	chrX:101975641-102007369	OK	4.70123	4.46377	-0.0747769	-0.483759	0.39365	0.570207	no		0.949489
BHLHE22	BHLHE22	BHLHE22	chr8:65492794-65496191	NOTEST	0	0	0	0	1	1	no		1
BHLHE23	BHLHE23	BHLHE23	chr20:61637330-61638387	NOTEST	0	0	0	0	1	1	no		1
BHLHE40	BHLHE40	BHLHE40	chr3:4938492-5026865	OK	34.6422	45.5332	0.39439	2.68534	5e-05	0.000373901	yes		1.31439
BHLHE40-AS1	BHLHE40-AS1	BHLHE40-AS1	chr3:4938492-5026865	NOTEST	0.120768	0.092157	-0.390067	0	1	1	no		0.763094
BHLHE41	BHLHE41	BHLHE41	chr12:26272958-26278003	OK	1.63359	2.62511	0.684332	3.33924	5e-05	0.000373901	yes		1.60696
BHMG1	BHMG1	BHMG1	chr19:46236508-46267797	NOTEST	0.020035	0.017655	-0.18245	0	1	1	no		0.881205
BHMT	BHMT	BHMT	chr5:78407603-78428113	NOTEST	0	0	0	0	1	1	no		1
BHMT2	BHMT2	BHMT2	chr5:78365546-78385897	NOTEST	0	0	0	0	1	1	no		1
BICC1	BICC1	BICC1	chr10:60272903-60591197	NOTEST	0	0	0	0	1	1	no		1
BICD1	BICD1	BICD1	chr12:32260184-32531141	OK	7.46586	8.34425	0.160474	1.14187	0.04785	0.124941	no		1.11765
BICD2	BICD2	BICD2	chr9:95473644-95527083	OK	18.2411	20.1214	0.141534	1.16388	0.04075	0.110298	no		1.10308
BID	BID	BID	chr22:18216905-18257431	OK	10.1731	9.37408	-0.118007	-0.786961	0.16605	0.316287	no		0.92146
BIK	BIK	BIK	chr22:43506753-43525718	NOTEST	0.0223776	0.0390446	0.803068	0	1	1	no		1.74481
BIN1	BIN1	BIN1	chr2:127805598-127864903	OK	63.4328	60.0491	-0.079086	-0.539601	0.34475	0.527097	no		0.946657
BIN2	BIN2	BIN2	chr12:51674821-51718464	NOTEST	0.0174702	0	#NAME?	0	1	1	no		#NAME?
BIN3	BIN3	BIN3	chr8:22462144-22526661	OK	12.3805	10.8015	-0.196838	-0.448005	0.43915	0.612817	no		0.872461
BIN3-IT1	BIN3-IT1	BIN3-IT1	chr8:22462144-22526661	NOTEST	0	0.0477978	inf	0	1	1	no		#VALUE!
BIRC2	BIRC2	BIRC2	chr11:102217912-102249401	OK	23.5004	24.781	0.0765472	0.62584	0.2739	0.449599	no		1.05449
BIRC3	BIRC3	BIRC3	chr11:102188180-102210135	OK	1.32812	0.88832	-0.580236	-2.69393	5e-05	0.000373901	yes		0.668854
BIRC5	BIRC5	BIRC5	chr17:76210276-76221716	OK	3.55768	1.00002	-1.8309	-6.42456	5e-05	0.000373901	yes		0.281089
BIRC6	BIRC6	BIRC6	chr2:32582095-32843965	OK	6.97865	7.13029	0.0310125	0.211111	0.70615	0.82713	no		1.02173
BIRC6-AS2	BIRC6-AS2	BIRC6-AS2	chr2:32582095-32843965	NOTEST	0.0451231	0	#NAME?	0	1	1	no		#NAME?
BIRC7	BIRC7	BIRC7	chr20:61867234-61871859	NOTEST	0.0162729	0	#NAME?	0	1	1	no		#NAME?
BIRC8	BIRC8	BIRC8	chr19:53792853-53794875	NOTEST	0	0	0	0	1	1	no		1
BISPR	BISPR,MVB12A	BISPR,MVB12A	chr19:17516494-17536148	NOTEST	0.352289	0.216421	-0.702916	0	1	1	no		0.614329
BIVM	BIVM	BIVM	chr13:103436630-103528351	OK	1.81169	1.6406	-0.14311	-0.371353	0.51075	0.67684	no		0.905565
BIVM-ERCC5	BIVM-ERCC5	BIVM-ERCC5	chr13:103436630-103528351	OK	1.66207	1.45959	-0.187419	-0.38505	0.4716	0.641945	no		0.878175
BLACAT1	BLACAT1	BLACAT1	chr1:205404013-205425214	NOTEST	0	0	0	0	1	1	no		1
BLACE	BLACE	BLACE	chr7:155149682-155160628	NOTEST	0	0	0	0	1	1	no		1
BLCAP	BLCAP	BLCAP	chr20:36145818-36156333	OK	96.7083	81.4465	-0.247787	-1.72344	0.00335	0.0145746	yes		0.842187
BLID	BLID	BLID	chr11:121959810-122073770	NOTEST	0	0.0555223	inf	0	1	1	no		#VALUE!
BLK	BLK	BLK	chr8:11351520-11422108	NOTEST	0.195545	0.0986617	-0.98694	0	1	1	no		0.504547
BLM	BLM	BLM	chr15:91260557-91358692	OK	0.581673	0.273273	-1.08987	-2.26204	5e-05	0.000373901	yes		0.469804
BLMH	BLMH	BLMH	chr17:28575212-28619184	OK	40.1734	36.5325	-0.137061	-1.07979	0.05325	0.135398	no		0.90937
BLNK	BLNK	BLNK	chr10:97951454-98031333	NOTEST	0.0127875	0.0491867	1.94354	0	1	1	no		3.84648
BLOC1S1	BLOC1S1	BLOC1S1	chr12:56109817-56118526	OK	79.4657	70.3549	-0.175681	-1.24092	0.02905	0.084682	no		0.88535
BLOC1S1-RDH5	BLOC1S1-RDH5	BLOC1S1-RDH5	chr12:56109817-56118526	OK	0.937492	0.887133	-0.0796563	-0.0653249	0.9071	0.950621	no		0.946283
BLOC1S2	BLOC1S2	BLOC1S2	chr10:102033034-102046469	OK	18.8905	21.4067	0.180402	1.4731	0.00955	0.034543	yes		1.1332
BLOC1S3	BLOC1S3	BLOC1S3	chr19:45682002-45685058	OK	6.3772	6.27609	-0.0230565	-0.145077	0.80355	0.892267	no		0.984145
BLOC1S4	BLOC1S4	BLOC1S4	chr4:6717841-6719387	OK	6.39455	9.36932	0.551101	3.06253	5e-05	0.000373901	yes		1.4652
BLOC1S5	BLOC1S5	BLOC1S5	chr6:7727010-8102828	OK	3.29537	5.06033	0.618789	0.490457	0.36655	0.546324	no		1.53559
BLOC1S5-TXNDC5	BLOC1S5-TXNDC5	BLOC1S5-TXNDC5	chr6:7727010-8102828	OK	2.38252	2.46042	0.0464155	0.0369605	0.9442	0.971094	no		1.0327
BLOC1S6	BLOC1S6	BLOC1S6	chr15:45879416-45901909	OK	8.67777	9.73886	0.166429	1.2757	0.0268	0.0795039	no		1.12228
BLVRA	BLVRA	BLVRA	chr7:43798271-43846941	OK	20.6047	16.7231	-0.301131	-1.94923	0.00085	0.0045508	yes		0.811616
BLVRB	BLVRB	BLVRB	chr19:40953690-40971725	OK	100.966	111.22	0.139541	1.19482	0.0349	0.0978318	no		1.10155
BLZF1	BLZF1	BLZF1	chr1:169075946-169429907	OK	10.7028	10.5106	-0.02615	-0.0767767	0.89495	0.945012	no		0.982037
BMF	BMF	BMF	chr15:40380090-40401085	OK	1.76041	2.98037	0.759582	4.08474	5e-05	0.000373901	yes		1.693
BMI1	BMI1	BMI1	chr10:22605311-22620414	OK	10.3265	10.6115	0.0392647	0.143786	0.79465	0.887462	no		1.02759
BMP1	BMP1	BMP1	chr8:22022652-22069840	OK	34.6012	34.2532	-0.0145836	-0.0972836	0.8669	0.929217	no		0.989942
BMP10	BMP10	BMP10	chr2:69092612-69098649	NOTEST	0	0	0	0	1	1	no		1
BMP15	BMP15	BMP15	chrX:50653734-50659641	NOTEST	0	0	0	0	1	1	no		1
BMP2	BMP2	BMP2	chr20:6748744-6760910	NOTEST	0.0653293	0.138983	1.08911	0	1	1	no		2.12743
BMP2K	BMP2K	BMP2K	chr4:79697531-79833341	OK	7.15197	8.763	0.293085	2.07695	0.00035	0.00210017	yes		1.22526
BMP3	BMP3	BMP3	chr4:81952118-81978685	NOTEST	0.00305952	0.00545956	0.83548	0	1	1	no		1.78445
BMP4	BMP4	BMP4	chr14:54416454-54423554	NOTEST	0.0109501	0.00974715	-0.167897	0	1	1	no		0.890139
BMP5	BMP5	BMP5	chr6:55620237-55740375	NOTEST	0	0	0	0	1	1	no		1
BMP6	BMP6	BMP6	chr6:7727010-8102828	OK	12.5888	16.2889	0.371747	0.949534	0.09795	0.214537	no		1.29392
BMP7	BMP7	BMP7	chr20:55743808-55841707	NOTEST	0	0	0	0	1	1	no		1
BMP7-AS1	BMP7-AS1	BMP7-AS1	chr20:55743808-55841707	NOTEST	0	0	0	0	1	1	no		1
BMP8A	BMP8A	BMP8A	chr1:39957317-40025370	NOTEST	0.115535	0.130853	0.179618	0	1	1	no		1.13258
BMP8B	BMP8B	BMP8B	chr1:40204516-40254533	NOTEST	0.0352518	0.0135854	-1.37564	0	1	1	no		0.385382
BMPER	BMPER	BMPER	chr7:33944522-34195484	NOTEST	0.0176354	0.0172685	-0.0303246	0	1	1	no		0.9792
BMPR1A	BMPR1A	BMPR1A	chr10:88516395-88684945	OK	7.41462	7.77338	0.0681676	0.492628	0.3861	0.563808	no		1.04838
BMPR1B	BMPR1B	BMPR1B	chr4:95679127-96079601	NOTEST	0	0	0	0	1	1	no		1
BMPR1B-AS1	BMPR1B-AS1	BMPR1B-AS1	chr4:95664818-95678684	NOTEST	0	0	0	0	1	1	no		1
BMPR2	BMPR2	BMPR2	chr2:203241049-203432474	OK	12.5045	14.0617	0.169324	1.16954	0.03925	0.107195	no		1.12453
BMS1	BMS1	BMS1	chr10:43277953-43330385	OK	9.39046	10.0136	0.0926982	0.799113	0.16125	0.3099	no		1.06636
BMS1P18	BMS1P18	BMS1P18	chr22:16150528-16193009	NOTEST	0	0	0	0	1	1	no		1
BMS1P20	BMS1P20	BMS1P20	chr22:22652462-22677324	OK	4.23152	4.21181	-0.00673301	-0.0336982	0.9533	0.976089	no		0.995344
BMS1P21	BMS1P21	BMS1P21	chr10:81664653-81691557	NOTEST	0.312779	0.242264	-0.368564	0	1	1	no		0.774553
BMS1P4	BMS1P4	BMS1P4	chr10:75458908-75490272	OK	1.5194	1.58569	0.0616087	0.200983	0.7293	0.843841	no		1.04363
BMS1P5	BMS1P5	BMS1P5	chr10:48927373-48980339	NOTEST	0.137309	0.101633	-0.434061	0	1	1	no		0.740175
BMS1P6	BMS1P6	BMS1P6	chr10:48185838-48203780	NOTEST	0.0306905	0.014168	-1.11515	0	1	1	no		0.461643
BMX	BMX	BMX	chrX:15518899-15574652	NOTEST	0	0	0	0	1	1	no		1
BNC1	BNC1	BNC1	chr15:83924654-83953468	OK	0.691234	0.75114	0.119907	0.405309	0.46285	0.633785	no		1.08666
BNC2	BNC2	BNC2	chr9:16409500-16870786	OK	1.77664	1.4216	-0.32163	-2.18055	0.0002	0.00128915	yes		0.800165
BNIP1	BNIP1	BNIP1	chr5:172571444-172591390	OK	7.85873	6.1153	-0.361873	-1.76215	0.00185	0.00885846	yes		0.778154
BNIP2	BNIP2	BNIP2	chr15:59955061-59981642	OK	26.16	28.7963	0.138519	1.17083	0.04095	0.110767	no		1.10077
BNIP3	BNIP3	BNIP3	chr10:133781186-133795517	OK	53.4752	62.3957	0.222577	1.73649	0.0031	0.0136931	yes		1.16682
BNIP3L	BNIP3L	BNIP3L	chr8:26240522-26270644	OK	35.0308	17.7975	-0.976949	-7.30665	5e-05	0.000373901	yes		0.508053
BNIPL	BNIPL	BNIPL	chr1:151009028-151020076	NOTEST	0.119225	0.112916	-0.0784414	0	1	1	no		0.94708
BOC	BOC	BOC	chr3:112930311-113160361	NOTEST	0.0300332	0.0463173	0.624993	0	1	1	no		1.5422
BOD1	BOD1	BOD1	chr5:173034147-173043666	OK	26.878	28.5071	0.0848926	0.693096	0.22655	0.393847	no		1.06061
BOD1L1	BOD1L1	BOD1L1	chr4:13570365-13629328	OK	7.34323	6.83953	-0.102519	-0.879976	0.1201	0.250422	no		0.931405
BOD1L2	BOD1L2	BOD1L2	chr18:54814292-54817639	NOTEST	0	0	0	0	1	1	no		1
BOK	BOK	BOK	chr2:242483800-242513553	OK	11.2465	11.4977	0.031872	0.233904	0.68135	0.809939	no		1.02234
BOK-AS1	BOK-AS1	BOK-AS1	chr2:242483800-242513553	NOTEST	0.0812114	0	#NAME?	0	1	1	no		#NAME?
BOLA1	BOLA1	BOLA1	chr1:149871154-149872348	OK	4.14676	3.18039	-0.382781	-1.18277	0.0437	0.116256	no		0.766958
BOLA2	BOLA2	BOLA2	chr16:29464913-29478899	NOTEST	0	0	0	0	1	1	no		1
BOLA2B	BOLA2B	BOLA2B	chr16:30204255-30218248	NOTEST	0	0	0	0	1	1	no		1
BOLA3	BOLA3	BOLA3	chr2:74362527-74375039	OK	29.0821	28.5265	-0.0278283	-0.151015	0.7946	0.887462	no		0.980896
BOLA3-AS1	BOLA3-AS1	BOLA3-AS1	chr2:74375107-74379516	OK	0.984506	0.690123	-0.512546	-0.885773	0.1096	0.233667	no		0.700984
BOLL	BOLL	BOLL	chr2:198591602-198651036	NOTEST	0	0	0	0	1	1	no		1
BOP1	BOP1	BOP1	chr8:145486001-145515120	OK	40.0401	34.3294	-0.222001	-1.82035	0.0013	0.00653208	yes		0.857375
BORA	BORA	BORA	chr13:73282494-73590591	OK	0.895798	0.619984	-0.530941	-0.627648	0.2684	0.443678	no		0.692103
BPESC1	BPESC1	BPESC1	chr3:138823026-138844005	NOTEST	0	0	0	0	1	1	no		1
BPGM	BPGM	BPGM	chr7:134331530-134364567	OK	47.024	40.9201	-0.200587	-1.70148	0.00275	0.0123581	yes		0.870196
BPHL	BPHL	BPHL	chr6:3118609-3153432	OK	5.41316	6.51207	0.266645	1.46381	0.0102	0.0364378	yes		1.20301
BPI	BPI	BPI	chr20:36932551-36965905	NOTEST	0	0	0	0	1	1	no		1
BPIFA1	BPIFA1	BPIFA1	chr20:31823801-31831115	NOTEST	0	0	0	0	1	1	no		1
BPIFA2	BPIFA2	BPIFA2	chr20:31755959-31769223	NOTEST	0	0	0	0	1	1	no		1
BPIFA3	BPIFA3	BPIFA3	chr20:31805115-31815612	NOTEST	0	0	0	0	1	1	no		1
BPIFA4P	BPIFA4P	BPIFA4P	chr20:31781410-31798268	NOTEST	0	0	0	0	1	1	no		1
BPIFB1	BPIFB1	BPIFB1	chr20:31870940-31897684	NOTEST	0	0	0	0	1	1	no		1
BPIFB2	BPIFB2	BPIFB2	chr20:31595383-31611515	NOTEST	0	0	0	0	1	1	no		1
BPIFB3	BPIFB3	BPIFB3	chr20:31643136-31661443	NOTEST	0	0	0	0	1	1	no		1
BPIFB4	BPIFB4	BPIFB4	chr20:31669317-31699557	NOTEST	0	0	0	0	1	1	no		1
BPIFB6	BPIFB6	BPIFB6	chr20:31619453-31631853	NOTEST	0	0	0	0	1	1	no		1
BPIFC	BPIFC	BPIFC	chr22:32809833-32853373	NOTEST	0	0	0	0	1	1	no		1
BPNT1	BPNT1	BPNT1	chr1:220046618-220321383	OK	8.42766	9.07382	0.106578	0.167232	0.78205	0.880595	no		1.07667
BPTF	BPTF	BPTF	chr17:65821779-65980494	OK	13.8555	16.5472	0.256124	1.76665	0.00205	0.0096451	yes		1.19427
BPY2B	BPY2B	BPY2B	chrY:27177049-27198251	NOTEST	0	0	0	0	1	1	no		1
BRAF	BRAF	BRAF	chr7:140433812-140624564	OK	3.2058	2.93441	-0.127618	-0.660712	0.243	0.414147	no		0.915342
BRAP	BRAP	BRAP	chr12:112079949-112123800	OK	9.54588	9.49758	-0.00731774	-0.0567518	0.9214	0.958599	no		0.994941
BRAT1	BRAT1	BRAT1	chr7:2577443-2595392	OK	14.5995	13.9461	-0.0660597	-0.521185	0.35915	0.540008	no		0.955243
BRCA1	BRCA1	BRCA1	chr17:41196311-41277500	OK	2.56027	1.55099	-0.723103	-3.76068	5e-05	0.000373901	yes		0.605793
BRCA2	BRCA2	BRCA2	chr13:32889616-32973809	NOTEST	0.223106	0.160564	-0.474575	0	1	1	no		0.719679
BRCAT107	BRCAT107	BRCAT107	chr5:44495245-44510384	NOTEST	0	0	0	0	1	1	no		1
BRCAT54	BRCAT54	BRCAT54	chr5:44744429-44808895	NOTEST	0.0757327	0.0754859	-0.00470773	0	1	1	no		0.996742
BRCC3	BRCC3	BRCC3	chrX:154299694-154351349	OK	10.5466	9.16379	-0.202763	-1.46387	0.0113	0.0396266	yes		0.868885
BRD1	BRD1	BRD1	chr22:50166925-50221196	OK	6.88374	7.77885	0.176364	1.33012	0.0205	0.0645779	no		1.13003
BRD2	BRD2	BRD2	chr6_ssto_hap7:4367204-4430060	OK	30.259	35.1235	0.215071	1.43419	0.01255	0.043217	yes		1.16076
BRD3	BRD3	BRD3	chr9:136890560-136933141	OK	14.0755	10.9388	-0.363737	-1.80783	0.0015	0.00741405	yes		0.777149
BRD4	BRD4	BRD4	chr19:15348300-15391262	OK	21.456	20.0371	-0.098705	-0.688786	0.2249	0.391738	no		0.933871
BRD7	BRD7	BRD7	chr16:50352928-50402845	OK	35.1339	35.3397	0.00842722	0.0724362	0.89935	0.947322	no		1.00586
BRD7P3	BRD7P3	BRD7P3	chr6:118781934-119031238	NOTEST	0.00745127	0.0262307	1.8157	0	1	1	no		3.5203
BRD8	BRD8	BRD8	chr5:137475458-137514358	OK	23.8344	25.0074	0.06931	0.593364	0.29935	0.477798	no		1.04921
BRD9	BRD9	BRD9	chr5:863849-892939	OK	12.035	12.6721	0.0744115	0.55609	0.33565	0.51803	no		1.05293
BRDT	BRDT	BRDT	chr1:92414927-92479985	NOTEST	0	0	0	0	1	1	no		1
BRDTP1	BRDTP1	BRDTP1	chrX:95592084-95592901	NOTEST	0	0	0	0	1	1	no		1
BRE	BRE	BRE	chr2:28004230-28561767	OK	35.2137	33.9618	-0.0522203	-0.426111	0.4537	0.625323	no		0.964451
BRE-AS1	BRE-AS1	BRE-AS1	chr2:28004230-28561767	NOTEST	0.131378	0.190154	0.533445	0	1	1	no		1.44738
BREA2	BREA2	BREA2	chr8:144779284-144780583	NOTEST	0.337009	0.236955	-0.508172	0	1	1	no		0.703113
BRF1	BRF1	BRF1	chr14:105675622-105864484	OK	10.975	10.8908	-0.0111164	-0.0325424	0.9548	0.976308	no		0.992324
BRF2	BRF2	BRF2	chr8:37654400-37707431	OK	8.97039	9.26341	0.0463728	0.294804	0.60455	0.752341	no		1.03267
BRI3	BRI3	BRI3	chr7:97910978-98030427	OK	148.983	130.929	-0.186369	-1.38864	0.01825	0.0587719	no		0.878815
BRI3BP	BRI3BP	BRI3BP	chr12:125478193-125511969	OK	2.61973	2.95719	0.174807	0.509245	0.3782	0.557449	no		1.12881
BRICD5	BRICD5	BRICD5	chr16:2255177-2261069	OK	2.55543	3.74337	0.550773	0.89059	0.12275	0.254835	no		1.46487
BRINP1	BRINP1	BRINP1	chr9:121928907-122131739	NOTEST	0	0	0	0	1	1	no		1
BRINP2	BRINP2	BRINP2	chr1:177140523-177251558	NOTEST	0.0451367	0.020555	-1.13482	0	1	1	no		0.455392
BRINP3	BRINP3	BRINP3	chr1:190066796-190446759	NOTEST	0.0127863	0.02241	0.809545	0	1	1	no		1.75266
BRIP1	BRIP1	BRIP1	chr17:59756546-59940920	NOTEST	0.432126	0.175136	-1.30297	0	1	1	no		0.405291
BRIX1	BRIX1	BRIX1	chr5:34915819-34925787	OK	16.7293	18.1259	0.115676	0.773273	0.17785	0.332943	no		1.08348
BRK1	BRK1	BRK1	chr3:10157332-10168874	OK	153.201	155.46	0.0211142	0.145678	0.79465	0.887462	no		1.01474
BRMS1	BRMS1	BRMS1	chr11:66104803-66112582	OK	48.3326	44.0747	-0.133047	-1.10799	0.0566	0.142083	no		0.911903
BRMS1L	BRMS1L	BRMS1L	chr14:36295596-36341169	OK	11.2956	10.4183	-0.116637	-0.84167	0.1426	0.284307	no		0.922335
BROX	BROX	BROX	chr1:222885894-222908538	OK	9.64498	10.815	0.165187	0.870886	0.12495	0.258022	no		1.12131
BRPF1	BRPF1	BRPF1	chr3:9773433-9789699	OK	9.8462	10.8395	0.13866	1.12351	0.0489	0.126989	no		1.10088
BRPF3	BRPF3	BRPF3	chr6:36164549-36200567	OK	11.9869	12.4265	0.0519602	0.444693	0.4386	0.612393	no		1.03667
BRS3	BRS3	BRS3	chrX:135570124-135574598	NOTEST	0	0	0	0	1	1	no		1
BRSK1	BRSK1	BRSK1	chr19:55795533-55823903	OK	2.17243	1.40106	-0.632796	-2.65631	5e-05	0.000373901	yes		0.644925
BRSK2	BRSK2	BRSK2	chr11:1411128-1483919	NOTEST	0.122566	0.188249	0.619078	0	1	1	no		1.53589
BRWD1	BRWD1	BRWD1	chr21:40557403-40685712	OK	7.16514	5.28228	-0.439833	-2.18679	5e-05	0.000373901	yes		0.73722
BRWD1-AS1	BRWD1-AS1	BRWD1-AS1	chr21:40687632-40695144	NOTEST	0	0	0	0	1	1	no		1
BRWD1-IT2	BRWD1-IT2	BRWD1-IT2	chr21:40685832-40686841	NOTEST	0.105014	0.176319	0.747606	0	1	1	no		1.679
BRWD3	BRWD3	BRWD3	chrX:79924986-80065233	OK	5.35462	4.78261	-0.162986	-1.37626	0.0159	0.0525389	no		0.893175
BSCL2	BSCL2	BSCL2	chr11:62457733-62494857	OK	12.2823	19.8641	0.693591	1.14014	0.0483	0.125825	no		1.6173
BSDC1	BSDC1	BSDC1	chr1:32830233-32860062	OK	20.9393	21.2502	0.0212668	0.176301	0.7584	0.865079	no		1.01485
BSG	BSG	BSG	chr19:571276-583493	OK	645.572	700.239	0.11727	0.829798	0.1448	0.287035	no		1.08468
BSN	BSN	BSN	chr3:49591921-49708982	NOTEST	0.0832646	0.0765445	-0.121405	0	1	1	no		0.919292
BSN-AS2	BSN-AS2	BSN-AS2	chr3:49586738-49591799	NOTEST	0.00762355	0.0156842	1.04077	0	1	1	no		2.05733
BSND	BSND	BSND	chr1:55464616-55474465	NOTEST	0	0	0	0	1	1	no		1
BSPH1	BSPH1	BSPH1	chr19:48471302-48495427	NOTEST	0	0	0	0	1	1	no		1
BSPRY	BSPRY	BSPRY	chr9:116111811-116133513	NOTEST	0.0156796	0	#NAME?	0	1	1	no		#NAME?
BST1	BST1	BST1	chr4:15704572-15733796	OK	0.571717	0.416867	-0.455713	-0.734901	0.18335	0.340265	no		0.72915
BST2	BST2	BST2	chr19:17513747-17516457	OK	6.42977	6.81344	0.0836171	0.367546	0.52825	0.691474	no		1.05967
BSX	BSX	BSX	chr11:122848356-122852379	NOTEST	0	0	0	0	1	1	no		1
BTAF1	BTAF1	BTAF1	chr10:93683735-93790080	OK	9.39417	12.8502	0.451955	3.88521	5e-05	0.000373901	yes		1.36789
BTBD1	BTBD1	BTBD1	chr15:83685180-83736167	OK	51.6892	50.0801	-0.0456256	-0.315662	0.58385	0.736692	no		0.96887
BTBD10	BTBD10	BTBD10	chr11:13409542-13484844	OK	30.4162	19.9033	-0.611832	-5.07144	5e-05	0.000373901	yes		0.654365
BTBD11	BTBD11	BTBD11	chr12:107712196-108053419	NOTEST	0.368938	0.541486	0.553546	0	1	1	no		1.46769
BTBD16	BTBD16	BTBD16	chr10:124030820-124097676	NOTEST	0.285353	0.382756	0.42368	0	1	1	no		1.34134
BTBD17	BTBD17	BTBD17	chr17:72352554-72357958	NOTEST	0	0	0	0	1	1	no		1
BTBD18	BTBD18	BTBD18	chr11:57479994-57586652	NOTEST	0.0430201	0.0404781	-0.0878706	0	1	1	no		0.94091
BTBD19	BTBD19	BTBD19	chr1:45274153-45279801	OK	21.5314	24.1225	0.163941	1.23473	0.03225	0.0919388	no		1.12034
BTBD2	BTBD2	BTBD2	chr19:1985446-2015702	OK	41.359	48.8651	0.240605	1.63829	0.0046	0.0190328	yes		1.18149
BTBD3	BTBD3	BTBD3	chr20:11871370-11907243	OK	18.3022	20.9748	0.196643	1.53918	0.00825	0.030745	yes		1.14603
BTBD6	BTBD6	BTBD6	chr14:105675622-105864484	OK	23.8332	27.5279	0.207926	0.716138	0.2093	0.372239	no		1.15503
BTBD7	BTBD7	BTBD7	chr14:93703895-93799438	OK	8.82317	10.0624	0.189608	1.33893	0.01875	0.0600861	no		1.14045
BTBD8	BTBD8	BTBD8	chr1:92545861-92613401	OK	0.729599	0.374753	-0.961164	-1.49693	0.0202	0.0637946	no		0.513642
BTBD9	BTBD9	BTBD9	chr6:38136226-38607924	OK	2.1888	1.44238	-0.601689	-3.69318	5e-05	0.000373901	yes		0.658982
BTC	BTC	BTC	chr4:75671447-75719882	NOTEST	0	0	0	0	1	1	no		1
BTD	BTD	BTD	chr3:15602210-15687328	OK	14.1548	18.2255	0.364665	1.76882	0.0033	0.0143974	yes		1.28758
BTF3	BTF3	BTF3	chr5:72794249-72801448	OK	426.455	398.318	-0.0984727	-0.69358	0.22745	0.394685	no		0.934021
BTF3L4	BTF3L4	BTF3L4	chr1:52521856-52556388	OK	11.5349	11.4053	-0.0162993	-0.133774	0.8143	0.898421	no		0.988766
BTF3P11	BTF3P11	BTF3P11	chr13:77502584-77503224	NOTEST	0	0	0	0	1	1	no		1
BTG1	BTG1	BTG1	chr12:92378751-92539673	OK	12.6988	12.6011	-0.0111405	-0.0926308	0.8743	0.932882	no		0.992308
BTG2	BTG2	BTG2	chr1:203274663-203278729	OK	38.0379	49.0306	0.366244	2.57426	5e-05	0.000373901	yes		1.28899
BTG3	BTG3	BTG3	chr21:18965967-18985268	OK	8.41908	6.39202	-0.397389	-2.13435	0.00015	0.00100331	yes		0.759231
BTG4	BTG4	BTG4	chr11:111338255-111383079	NOTEST	0	0	0	0	1	1	no		1
BTK	BTK	BTK	chrX:100604434-100645784	NOTEST	0.0602326	0.0969382	0.686521	0	1	1	no		1.6094
BTLA	BTLA	BTLA	chr3:112182812-112218408	NOTEST	0.0311269	0.0222102	-0.486939	0	1	1	no		0.713537
BTN1A1	BTN1A1	BTN1A1	chr6:26501494-26510652	NOTEST	0.00691615	0.0691331	3.32134	0	1	1	no		9.99592
BTN2A1	BTN2A1	BTN2A1	chr6:26458131-26482737	OK	8.36302	10.1031	0.272705	1.95729	0.0007	0.00384551	yes		1.20807
BTN2A2	BTN2A2	BTN2A2	chr6:26383323-26395100	OK	5.75677	5.49814	-0.0663137	-0.383025	0.50075	0.668438	no		0.955075
BTN2A3P	BTN2A3P	BTN2A3P	chr6:26421618-26430816	OK	0.972119	1.0139	0.0607114	0.181774	0.75095	0.859365	no		1.04298
BTN3A1	BTN3A1	BTN3A1	chr6:26402464-26415444	OK	3.91212	3.06932	-0.350033	-1.99314	0.00085	0.0045508	yes		0.784566
BTN3A2	BTN3A2	BTN3A2	chr6:26365386-26378548	OK	8.08717	7.28143	-0.151413	-1.04255	0.06795	0.162716	no		0.900368
BTN3A3	BTN3A3	BTN3A3	chr6:26440699-26453643	OK	5.58338	4.97579	-0.166212	-1.02374	0.0721	0.170549	no		0.89118
BTNL10	BTNL10	BTNL10	chr1:228698059-228699989	NOTEST	0	0	0	0	1	1	no		1
BTNL2	BTNL2	BTNL2	chr6_ssto_hap7:3705728-3722355	NOTEST	0	0	0	0	1	1	no		1
BTNL3	BTNL3	BTNL3	chr5:180415844-180433727	NOTEST	0	0	0	0	1	1	no		1
BTNL8	BTNL8	BTNL8	chr5:180326076-180377906	NOTEST	0.0251412	0.0342621	0.446561	0	1	1	no		1.36279
BTNL9	BTNL9	BTNL9	chr5:180467224-180488523	NOTEST	0	0	0	0	1	1	no		1
BTRC	BTRC	BTRC	chr10:103113789-103317078	OK	7.55556	6.16583	-0.293242	-2.30844	5e-05	0.000373901	yes		0.816066
BUB1	BUB1	BUB1	chr2:111395274-111435684	OK	2.06776	0.788675	-1.39057	-5.24643	5e-05	0.000373901	yes		0.381414
BUB1B	BUB1B	BUB1B	chr15:40453209-40569688	OK	1.96123	0.720101	-1.44549	-5.11964	5e-05	0.000373901	yes		0.367167
BUB3	BUB3	BUB3	chr10:124913759-124924886	OK	59.8834	57.1534	-0.0673156	-0.432123	0.44815	0.620842	no		0.954412
BUD13	BUD13	BUD13	chr11:116618885-116643714	OK	8.31423	8.19833	-0.0202529	-0.130597	0.81645	0.899355	no		0.98606
BUD31	BUD31	BUD31	chr7:99006600-99063824	OK	33.9808	30.0745	-0.176175	-0.544744	0.34705	0.529246	no		0.885046
BVES	BVES	BVES	chr6:105544698-105585049	NOTEST	0.228409	0.120344	-0.924461	0	1	1	no		0.526877
BVES-AS1	BVES-AS1	BVES-AS1	chr6:105585561-105627858	NOTEST	0	0	0	0	1	1	no		1
BYSL	BYSL	BYSL	chr6:41888964-41900784	OK	12.8254	12.7968	-0.00322116	-0.0226469	0.9721	0.985783	no		0.99777
BZRAP1	BZRAP1	BZRAP1	chr17:56378587-56494943	NOTEST	0	0	0	0	1	1	no		1
BZRAP1-AS1	BZRAP1-AS1	BZRAP1-AS1	chr17:56378587-56494943	NOTEST	0.0451009	0	#NAME?	0	1	1	no		#NAME?
BZW1	BZW1	BZW1	chr2:201560445-201688569	OK	117.888	100.811	-0.225758	-1.49348	0.0099	0.0355913	yes		0.855146
BZW2	BZW2	BZW2	chr7:16685758-16746148	OK	41.7531	42.1666	0.0142171	0.121306	0.8311	0.908883	no		1.0099
C10orf10	C10orf10	C10orf10	chr10:45455218-45500777	OK	30.4859	68.1566	1.16071	6.00001	5e-05	0.000373901	yes		2.23567
C10orf105	C10orf105	C10orf105	chr10:73156690-73575704	NOTEST	0	0	0	0	1	1	no		1
C10orf107	C10orf107	C10orf107	chr10:63422718-63526091	NOTEST	0	0.132417	inf	0	1	1	no		#VALUE!
C10orf11	C10orf11	C10orf11	chr10:77191403-78317133	NOTEST	0	0.0501843	inf	0	1	1	no		#VALUE!
C10orf111	C10orf111	C10orf111	chr10:15137383-15146256	NOTEST	0.0687802	0.115893	0.752725	0	1	1	no		1.68497
C10orf113	C10orf113	C10orf113	chr10:21068902-21463852	NOTEST	0	0	0	0	1	1	no		1
C10orf12	C10orf12	C10orf12	chr10:98741040-98745585	OK	1.30455	1.26972	-0.0390399	-0.172273	0.7671	0.871378	no		0.973302
C10orf120	C10orf120	C10orf120	chr10:124457224-124459338	NOTEST	0	0	0	0	1	1	no		1
C10orf126	C10orf126	C10orf126	chr10:29135336-29170826	NOTEST	0	0	0	0	1	1	no		1
C10orf128	C10orf128	C10orf128	chr10:50362768-50396445	NOTEST	0.0404774	0.21322	2.39715	0	1	1	no		5.26762
C10orf131	C10orf131	C10orf131	chr10:97471535-97849992	NOTEST	0.0170729	0.172818	3.33947	0	1	1	no		10.1223
C10orf142	C10orf142	C10orf142	chr10:44788197-44790097	NOTEST	0	0	0	0	1	1	no		1
C10orf2	C10orf2	C10orf2	chr10:102747292-102754158	OK	8.46791	8.9433	0.0788013	0.452287	0.4356	0.610331	no		1.05614
C10orf25	C10orf25	C10orf25	chr10:45455218-45500777	OK	2.84296	2.98917	0.0723507	0.0661432	0.9013	0.948508	no		1.05143
C10orf32	C10orf32	C10orf32	chr10:104613966-104661655	OK	7.08482	7.49842	0.0818544	0.497062	0.3853	0.56297	no		1.05838
C10orf32-ASMT	C10orf32-ASMT	C10orf32-ASMT	chr10:104613966-104661655	NOTEST	0.0248161	0.132183	2.41319	0	1	1	no		5.32651
C10orf35	C10orf35	C10orf35	chr10:71390002-71393355	NOTEST	0.234214	0.215276	-0.12164	0	1	1	no		0.919142
C10orf53	C10orf53	C10orf53	chr10:50887683-50916956	NOTEST	0	0	0	0	1	1	no		1
C10orf54	C10orf54	C10orf54	chr10:73156690-73575704	OK	9.03996	7.35541	-0.297512	-2.30756	0.0001	0.000697417	yes		0.813654
C10orf55	C10orf55	C10orf55	chr10:75669726-75682535	NOTEST	0.317077	0.15496	-1.03293	0	1	1	no		0.488717
C10orf62	C10orf62	C10orf62	chr10:99344101-99372555	NOTEST	0.0841571	0.116289	0.466561	0	1	1	no		1.38181
C10orf67	C10orf67	C10orf67	chr10:23605519-23633772	NOTEST	0	0	0	0	1	1	no		1
C10orf71	C10orf71	C10orf71	chr10:50507186-50535537	NOTEST	0	0	0	0	1	1	no		1
C10orf71-AS1	C10orf71-AS1	C10orf71-AS1	chr10:50504327-50506938	NOTEST	0	0	0	0	1	1	no		1
C10orf76	C10orf76	C10orf76	chr10:103605355-103815932	OK	6.63621	6.01978	-0.140649	-1.0038	0.07975	0.183814	no		0.907111
C10orf82	C10orf82	C10orf82	chr10:118423206-118429481	NOTEST	0	0	0	0	1	1	no		1
C10orf88	C10orf88	C10orf88	chr10:124690418-124713919	OK	5.07842	4.83353	-0.0713013	-0.440531	0.43945	0.613098	no		0.951779
C10orf90	C10orf90	C10orf90	chr10:128113573-128210010	NOTEST	0.225173	0.0915014	-1.29917	0	1	1	no		0.40636
C10orf91	C10orf91	C10orf91	chr10:134258713-134261825	NOTEST	0.0609897	0.081594	0.419899	0	1	1	no		1.33783
C10orf95	C10orf95	C10orf95	chr10:104209573-104216050	NOTEST	0.247591	0.137054	-0.853218	0	1	1	no		0.553549
C10orf99	C10orf99	C10orf99	chr10:85933553-85945050	NOTEST	0	0	0	0	1	1	no		1
C11orf1	C11orf1	C11orf1	chr11:111744779-111754797	OK	23.1425	25.3075	0.129019	0.736131	0.1981	0.357801	no		1.09355
C11orf16	C11orf16	C11orf16	chr11:8932700-8954553	NOTEST	0.0194823	0.0105888	-0.879626	0	1	1	no		0.543508
C11orf21	C11orf21	C11orf21	chr11:2317506-2323143	NOTEST	0	0	0	0	1	1	no		1
C11orf24	C11orf24	C11orf24	chr11:68028802-68039469	OK	14.2266	14.1217	-0.0106809	-0.0750705	0.89355	0.944015	no		0.992624
C11orf30	C11orf30	C11orf30	chr11:76156068-76263943	OK	5.04829	3.48363	-0.535206	-3.91596	5e-05	0.000373901	yes		0.69006
C11orf31	C11orf31	C11orf31	chr11:57479994-57586652	OK	58.1311	60.6193	0.0604676	0.148705	0.79085	0.885766	no		1.0428
C11orf39	C11orf39	C11orf39	chr11:131240370-132206716	NOTEST	0	0	0	0	1	1	no		1
C11orf40	C11orf40	C11orf40	chr11:4592652-4599050	NOTEST	0	0	0	0	1	1	no		1
C11orf42	C11orf42	C11orf42	chr11:6226797-6232365	NOTEST	0.0538782	0.0393785	-0.452292	0	1	1	no		0.730881
C11orf44	C11orf44	C11orf44	chr11:130542850-130587247	NOTEST	0	0	0	0	1	1	no		1
C11orf45	C11orf45	C11orf45	chr11:128761312-128787951	NOTEST	0.260549	0.219116	-0.24986	0	1	1	no		0.840978
C11orf49	C11orf49	C11orf49	chr11:46958239-47198676	OK	20.8317	20.384	-0.0313446	-0.119162	0.8364	0.912189	no		0.978508
C11orf52	C11orf52	C11orf52	chr11:111779343-111797595	NOTEST	0.0531411	0.120563	1.18189	0	1	1	no		2.26874
C11orf53	C11orf53	C11orf53	chr11:111126706-111157129	NOTEST	0	0	0	0	1	1	no		1
C11orf54	C11orf54	C11orf54	chr11:93474759-93496268	OK	5.02668	4.31872	-0.219002	-1.2257	0.02825	0.0827774	no		0.85916
C11orf57	C11orf57	C11orf57	chr11:111944967-111957522	OK	12.3823	16.0483	0.374141	2.38938	5e-05	0.000373901	yes		1.29607
C11orf58	C11orf58	C11orf58	chr11:16760147-16779901	OK	37.3314	37.6482	0.0121878	0.0838771	0.8832	0.937546	no		1.00848
C11orf63	C11orf63	C11orf63	chr11:122753235-122830430	OK	1.00002	0.954794	-0.0667628	-0.197081	0.7328	0.846472	no		0.954778
C11orf65	C11orf65	C11orf65	chr11:108253726-108338258	NOTEST	0.182149	0.137211	-0.408724	0	1	1	no		0.753289
C11orf68	C11orf68	C11orf68	chr11:65684282-65686531	OK	29.6039	23.4475	-0.336353	-2.60968	5e-05	0.000373901	yes		0.792041
C11orf70	C11orf70	C11orf70	chr11:101918168-101955291	NOTEST	0	0.0613113	inf	0	1	1	no		#VALUE!
C11orf71	C11orf71	C11orf71	chr11:114262169-114281332	OK	4.00744	7.6143	0.92603	2.29106	0.00015	0.00100331	yes		1.90004
C11orf72	C11orf72	C11orf72	chr11:67370350-67374177	NOTEST	0.357966	0.302615	-0.242339	0	1	1	no		0.845374
C11orf73	C11orf73	C11orf73	chr11:86013252-86056985	OK	35.9527	35.8725	-0.00322213	-0.024544	0.96545	0.981973	no		0.997769
C11orf74	C11orf74	C11orf74	chr11:36613492-36680841	OK	14.6371	12.6068	-0.215424	-1.11656	0.05145	0.13201	no		0.861293
C11orf80	C11orf80	C11orf80	chr11:66512206-66614003	OK	4.83303	4.3188	-0.1623	-0.540516	0.3539	0.535158	no		0.893599
C11orf84	C11orf84	C11orf84	chr11:63580845-63595190	OK	27.6004	25.7958	-0.0975533	-0.796075	0.1648	0.31434	no		0.934617
C11orf85	C11orf85	C11orf85	chr11:64705701-64739563	NOTEST	0	0	0	0	1	1	no		1
C11orf86	C11orf86	C11orf86	chr11:66742753-66744479	OK	0.679781	1.1219	0.722796	1.38621	0.02035	0.0641867	no		1.65038
C11orf87	C11orf87	C11orf87	chr11:109292845-109299893	NOTEST	0.00320985	0.00718836	1.16316	0	1	1	no		2.23947
C11orf88	C11orf88	C11orf88	chr11:111385509-111407756	NOTEST	0	0	0	0	1	1	no		1
C11orf91	C11orf91	C11orf91	chr11:33719653-33722286	OK	8.05168	6.70459	-0.264141	-1.13957	0.04855	0.126291	no		0.832694
C11orf94	C11orf94	C11orf94	chr11:45928085-45928833	NOTEST	0	0	0	0	1	1	no		1
C11orf95	C11orf95	C11orf95	chr11:63527363-63536113	OK	9.93242	10.6331	0.0983487	0.815391	0.1558	0.302138	no		1.07055
C11orf96	C11orf96	C11orf96	chr11:43964105-43965433	NOTEST	0.124315	0.0774624	-0.68243	0	1	1	no		0.623115
C11orf97	C11orf97	C11orf97	chr11:94245694-94265289	NOTEST	0	0	0	0	1	1	no		1
C11orf98	C11orf98	C11orf98	chr11:62430288-62441162	OK	91.0738	85.1564	-0.0969213	-0.623999	0.27755	0.453433	no		0.935026
C12orf10	C12orf10	C12orf10	chr12:53693469-53700965	OK	43.8236	41.4726	-0.0795514	-0.637274	0.27125	0.447021	no		0.946352
C12orf29	C12orf29	C12orf29	chr12:88429267-88535993	OK	6.75903	6.65367	-0.0226655	-0.0820286	0.8916	0.943156	no		0.984412
C12orf4	C12orf4	C12orf4	chr12:4596895-4647674	OK	8.28819	6.37147	-0.379432	-2.76963	5e-05	0.000373901	yes		0.76874
C12orf40	C12orf40	C12orf40	chr12:40019971-40115720	NOTEST	0	0.0287002	inf	0	1	1	no		#VALUE!
C12orf42	C12orf42	C12orf42	chr12:103631368-103889788	NOTEST	0	0	0	0	1	1	no		1
C12orf43	C12orf43	C12orf43	chr12:121416370-121454305	OK	10.8969	9.23013	-0.239497	-1.65596	0.00345	0.0149677	yes		0.847041
[truncated: 24,230 more rows]

## Sheet: Endo marker
test_id	gene_id	gene	locus	status	shSCR	shSWELL1	log2(fold_change)	test_stat	p_value	q_value	significant	Fold change shSWELL1 vs shSCR
LRRC8 proteins HUVEC
LRRC8A	LRRC8A	LRRC8A	chr9:131644390-131680317	OK	108.193	20.7912	-2.37957	-17.5086	5e-05	0.000373901	yes	0.192167
LRRC8B	LRRC8B	LRRC8B	chr1:89990396-90063420	NOTEST	0.488456	0.417219	-0.227423	0	1	1	no	0.854159
LRRC8C	LRRC8C	LRRC8C	chr1:90098643-90185094	OK	4.023	4.05695	0.0121242	0.0892607	0.87105	0.930694	no	1.00844
LRRC8D	LRRC8D	LRRC8D	chr1:90286572-90401989	OK	12.9248	11.105	-0.218932	-1.75768	0.0022	0.0102422	yes	0.859201
LRRC8E	LRRC8E	LRRC8E	chr19:7953389-7966908	OK	2.71439	1.65326	-0.715317	-3.43227	5e-05	0.000373901	yes	0.609071
LRRC8 proteins C2C12 myotube
LRRC8A					7.2		15.0268
LRRC8B					6
LRRC8D					5
LRRC8E					1.8
LRRC8 proteins 3T3-F442A adipocytes
8A					33.6		3.22003
8B					1.6
8C					2.7
8D					5.3
8E					0.0005
Mechano-sensitive/Mechanoresponsive ion channels
PIEZO1	PIEZO1	PIEZO1	chr16:88772890-88851628	OK	43.3526	47.5301	0.132723	0.90249	0.114	0.240938	no	1.09636	2.49565
PIEZO2	PIEZO2	PIEZO2	chr18:10670243-11148761	NOTEST	0.00193866	0	#NAME?	0	1	1	no
TRPV4	TRPV4	TRPV4	chr12:110220891-110271241	NOTEST	0.0127897	0.00565165	-1.17824	0	1	1	no
Endothelial genes
NOS3	NOS3	NOS3	chr7:150688143-150721586	OK	74.2964	40.58	-0.872526	-5.75977	5e-05	0.000373901	yes	0.54619
ICAM1	ICAM1	ICAM1	chr19:10381516-10397291	OK	57.0922	30.7061	-0.89477	-6.52325	5e-05	0.000373901	yes	0.537833
FLT1	FLT1	FLT1	chr13:28874482-29069265	OK	21.3592	17.4319	-0.293122	-1.9386	0.00055	0.00311943	yes	0.816134
EPOR	EPOR	EPOR	chr19:11487880-11495018	OK	11.087	13.4149	0.274972	2.01494	0.0005	0.0028739	yes	1.20997
CDH5	CDH5	CDH5	chr16:66400524-66438689	OK	88.6316	111.405	0.329918	2.32386	0.0001	0.000697417	yes	1.25694
CD36	CD36	CD36	chr7:80231503-80308593	OK	7.30605	25.0841	1.77961	10.7318	5e-05	0.000373901	yes	3.43333
VWF	VWF	VWF	chr12:6058039-6233836	OK	1.2166	1.55672	0.355661	2.06629	0.00055	0.00311943	yes	1.27957
PECAM1	PECAM1	PECAM1	chr17:62396776-62407083	OK	41.856	81.6478	0.96398	6.72672	5e-05	0.000373901	yes	1.95068
KDR	KDR	KDR	chr4:55944425-55991762	OK	22.2871	32.1649	0.529278	3.64672	5e-05	0.000373901	yes	1.44321
VEGFA	VEGFA	VEGFA	chr6:43737945-43754223	OK	11.0704	18.0961	0.708967	5.2867	5e-05	0.000373901	yes	1.63463
